# Supplementary material for: Development and Initial Validation of The Russian Version of The RAADS-14: A Self-Report Questionnaire to Assess Autistic Traits
Source: Research Square preprint supplement (doi:10.21203/rs.3.rs-109635/v1), 2020-11-25
Supplement: Supplementary file 1 [file 59f96f72c8c2bcb8749283c9.xlsx]

## Sheet: Title
	This spreadsheet is a Supplementary file 2 to a manuscript sent for peer review to the Scientific Reports journal
Manuscript title	Development and initial validation of the Russian version of the RAADS-14: a self-report questionnaire to assess autistic traits
Authors	Ivan Skorokhodov, Ksenia Vergeles, Elena Skorokhodova, Svetlana Firsova, Galina Portnova, Anton Varlamov

## Sheet: raads 30.09.2020
Participant Number	Age	Sex	RAADS1	RAADS2	RAADS3	RAADS4	RAADS5	RAADS6r	RAADS7	RAADS8	RAADS9	RAADS10	RAADS11	RAADS12	RAADS13	RAADS14	Were you diagnosed with autism in a clinically established conditions?	Do you have a diagnosis of Autism or Autism Spectrum established with ADOS?	Sample	Autism_control	RAADS-14 score	Mentalizing Deficits	Sensory reactivity	Social anxiety	Big5-Neuroticism	Big5-Extraversion	Big5-Openness	Big5-Agreeableness	Big5-Conscientiousness
1	999	999	0	3	1	0	1	0	0	0	0	0	0	2	0	0	999	999	1	0	7	2	3	2	999	999	999	999	999
2	18	1	0	0	0	0	0	0	0	0	0	0	0	0	0	0	999	999	1	0	0	0	0	0	999	999	999	999	999
3	18	1	0	0	0	0	0	0	0	0	0	0	0	0	0	0	999	999	1	0	0	0	0	0	999	999	999	999	999
4	21	1	0	0	0	0	0	0	0	0	0	0	0	0	0	0	999	999	1	0	0	0	0	0	999	999	999	999	999
5	21	1	0	0	0	0	0	0	0	0	0	0	0	0	0	0	999	999	1	0	0	0	0	0	999	999	999	999	999
6	22	1	0	0	0	0	0	0	0	0	0	0	0	0	0	0	999	999	1	0	0	0	0	0	999	999	999	999	999
7	19	1	0	0	0	0	0	0	0	0	0	0	0	1	0	0	999	999	1	0	1	1	0	0	999	999	999	999	999
8	18	1	0	0	0	0	0	0	1	0	0	0	0	0	0	0	999	999	1	0	1	0	1	0	999	999	999	999	999
9	25	1	0	0	0	0	1	0	0	0	0	0	0	0	0	0	999	999	1	0	1	0	0	1	999	999	999	999	999
10	18	1	0	0	0	0	1	0	0	0	0	0	0	0	0	0	999	999	1	0	1	0	0	1	999	999	999	999	999
11	20	1	0	1	0	0	0	0	0	0	0	0	0	0	0	1	999	999	1	0	2	1	1	0	999	999	999	999	999
12	18	1	0	0	0	0	0	0	0	0	0	1	0	0	0	1	999	999	1	0	2	1	1	0	999	999	999	999	999
13	35	1	0	0	0	0	0	0	0	0	0	2	0	0	0	0	999	999	1	0	2	0	2	0	999	999	999	999	999
14	18	1	0	0	0	0	0	0	1	0	0	0	0	1	0	0	999	999	1	0	2	1	1	0	999	999	999	999	999
15	18	1	0	0	0	0	0	0	2	0	0	0	0	0	0	0	999	999	1	0	2	0	2	0	999	999	999	999	999
16	18	1	0	0	0	0	0	0	2	0	0	0	0	0	0	0	999	999	1	0	2	0	2	0	999	999	999	999	999
17	21	1	0	0	1	0	1	0	0	0	0	0	0	0	0	0	999	999	1	0	2	0	0	2	999	999	999	999	999
18	18	1	0	3	0	0	0	0	0	0	0	0	0	0	0	0	999	999	1	0	3	0	3	0	999	999	999	999	999
19	18	1	0	0	0	0	0	0	2	0	0	0	0	1	0	0	999	999	1	0	3	1	2	0	999	999	999	999	999
20	33	1	0	0	0	0	0	0	3	0	0	0	0	0	0	0	999	999	1	0	3	0	3	0	999	999	999	999	999
21	17	1	0	0	0	0	0	0	3	0	0	0	0	0	0	0	999	999	1	0	3	0	3	0	999	999	999	999	999
22	20	1	0	0	0	0	0	0	3	0	0	0	0	0	0	0	999	999	1	0	3	0	3	0	999	999	999	999	999
23	24	1	0	0	0	0	0	1	0	0	0	0	0	2	0	0	999	999	1	0	3	2	0	1	999	999	999	999	999
24	18	1	0	0	0	0	0	2	0	0	0	0	0	1	0	0	999	999	1	0	3	1	0	2	999	999	999	999	999
25	19	1	0	0	0	0	0	2	0	0	0	0	1	0	0	0	999	999	1	0	3	1	0	2	999	999	999	999	999
26	19	1	0	0	0	0	0	3	0	0	0	0	0	0	0	0	999	999	1	0	3	0	0	3	999	999	999	999	999
27	18	1	0	0	0	0	0	3	0	0	0	0	0	0	0	0	999	999	1	0	3	0	0	3	999	999	999	999	999
28	18	1	0	0	0	0	0	3	0	0	0	0	0	0	0	0	999	999	1	0	3	0	0	3	999	999	999	999	999
29	20	1	0	0	0	0	0	3	0	0	0	0	0	0	0	0	999	999	1	0	3	0	0	3	999	999	999	999	999
30	21	1	0	0	0	0	0	3	0	0	0	0	0	0	0	0	999	999	1	0	3	0	0	3	999	999	999	999	999
31	18	1	0	0	1	0	0	0	0	0	0	0	0	0	0	3	999	999	1	0	4	3	0	1	999	999	999	999	999
32	18	1	0	0	0	0	0	0	0	0	1	0	0	3	0	0	999	999	1	0	4	4	0	0	999	999	999	999	999
33	19	1	0	0	0	0	0	0	2	0	0	0	0	1	0	1	999	999	1	0	4	2	2	0	999	999	999	999	999
34	19	1	0	0	0	0	1	0	0	0	0	0	0	3	0	0	999	999	1	0	4	3	0	1	999	999	999	999	999
35	18	1	0	0	0	0	1	0	1	0	0	0	0	0	1	1	999	999	1	0	4	2	1	1	999	999	999	999	999
36	22	1	0	0	0	0	0	0	2	0	0	3	0	0	0	0	999	999	1	0	5	0	5	0	999	999	999	999	999
37	20	1	0	0	0	1	0	0	3	0	0	0	0	0	0	1	999	999	1	0	5	2	3	0	999	999	999	999	999
38	20	1	0	0	3	0	2	0	0	0	0	0	0	0	0	0	999	999	1	0	5	0	0	5	999	999	999	999	999
39	18	1	0	0	1	1	0	0	1	1	0	0	0	1	0	1	999	999	1	0	6	3	1	2	999	999	999	999	999
40	18	1	0	0	0	0	0	3	3	0	0	0	0	0	0	0	999	999	1	0	6	0	3	3	999	999	999	999	999
41	19	1	0	3	0	1	0	0	0	0	0	3	0	0	0	0	999	999	1	0	7	1	6	0	999	999	999	999	999
42	19	1	0	2	0	0	0	0	1	0	0	0	1	1	1	1	999	999	1	0	7	4	3	0	999	999	999	999	999
43	17	1	0	0	0	3	0	0	2	0	1	0	0	0	1	0	999	999	1	0	7	5	2	0	999	999	999	999	999
44	18	1	0	0	0	1	0	0	3	0	0	0	0	0	0	3	999	999	1	0	7	4	3	0	999	999	999	999	999
45	22	1	0	0	0	0	0	1	2	1	0	0	0	1	1	1	999	999	1	0	7	3	2	2	999	999	999	999	999
46	18	1	0	0	1	0	0	3	0	0	0	0	0	3	0	0	999	999	1	0	7	3	0	4	999	999	999	999	999
47	21	1	0	0	0	0	0	3	0	1	0	2	1	0	0	0	999	999	1	0	7	1	2	4	999	999	999	999	999
48	18	1	0	1	1	0	1	0	0	0	1	0	0	3	0	0	999	999	1	0	7	4	1	2	999	999	999	999	999
49	18	1	0	0	1	0	1	0	0	1	0	3	0	0	0	1	999	999	1	0	7	1	3	3	999	999	999	999	999
50	20	1	0	0	0	1	1	2	3	0	0	0	0	0	0	0	999	999	1	0	7	1	3	3	999	999	999	999	999
51	20	1	0	0	0	0	0	0	2	0	0	1	3	0	0	2	999	999	1	0	8	5	3	0	999	999	999	999	999
52	19	1	0	0	0	0	0	0	3	0	0	0	0	2	0	3	999	999	1	0	8	5	3	0	999	999	999	999	999
53	18	1	0	0	1	0	0	3	0	1	0	0	0	3	0	0	999	999	1	0	8	3	0	5	999	999	999	999	999
54	19	1	0	0	0	2	1	0	1	1	0	3	0	0	0	0	999	999	1	0	8	2	4	2	999	999	999	999	999
55	18	1	0	0	0	0	1	0	2	1	0	1	1	0	1	1	999	999	1	0	8	3	3	2	999	999	999	999	999
56	30	1	0	0	0	0	1	3	3	0	0	0	0	0	1	0	999	999	1	0	8	1	3	4	999	999	999	999	999
57	23	1	0	0	0	1	3	0	0	2	0	0	1	0	1	0	999	999	1	0	8	3	0	5	999	999	999	999	999
58	18	1	0	0	0	1	0	0	2	0	0	3	0	2	0	1	999	999	1	0	9	4	5	0	999	999	999	999	999
59	19	1	0	3	0	0	0	0	3	0	0	0	0	0	0	3	999	999	1	0	9	3	6	0	999	999	999	999	999
60	19	1	0	0	0	0	0	0	3	0	0	0	0	3	3	0	999	999	1	0	9	6	3	0	999	999	999	999	999
61	22	1	0	0	1	1	0	0	3	0	0	0	0	3	1	0	999	999	1	0	9	5	3	1	999	999	999	999	999
62	18	1	0	1	0	0	0	0	3	0	0	0	0	3	1	1	999	999	1	0	9	5	4	0	999	999	999	999	999
63	18	1	0	0	0	0	0	0	3	0	0	0	0	3	0	3	999	999	1	0	9	6	3	0	999	999	999	999	999
64	28	1	0	0	0	1	0	1	2	0	0	0	0	2	2	1	999	999	1	0	9	6	2	1	999	999	999	999	999
65	18	1	0	0	1	0	1	0	3	0	0	0	0	3	1	0	999	999	1	0	9	4	3	2	999	999	999	999	999
66	19	1	0	0	0	1	1	3	3	0	0	0	1	0	0	0	999	999	1	0	9	2	3	4	999	999	999	999	999
67	22	1	0	3	1	0	0	0	1	0	1	1	0	0	3	0	999	999	1	0	10	4	5	1	999	999	999	999	999
68	21	1	0	0	0	1	0	0	2	0	0	3	0	2	0	2	999	999	1	0	10	5	5	0	999	999	999	999	999
69	18	1	0	3	0	0	0	0	2	0	1	0	0	3	0	1	999	999	1	0	10	5	5	0	999	999	999	999	999
70	18	1	0	0	0	0	0	3	3	0	0	0	0	2	0	2	999	999	1	0	10	4	3	3	999	999	999	999	999
71	18	1	0	0	0	0	1	0	3	1	1	0	0	3	0	1	999	999	1	0	10	5	3	2	999	999	999	999	999
72	18	1	0	1	0	1	1	3	0	0	0	0	1	3	0	0	999	999	1	0	10	5	1	4	999	999	999	999	999
73	23	1	0	0	0	2	3	0	3	0	0	0	0	0	0	2	999	999	1	0	10	4	3	3	999	999	999	999	999
74	18	1	0	1	0	1	0	0	3	0	0	1	0	3	1	1	999	999	1	0	11	6	5	0	999	999	999	999	999
75	23	1	0	2	0	0	0	1	2	0	0	0	0	3	0	3	999	999	1	0	11	6	4	1	999	999	999	999	999
76	22	1	0	0	1	1	1	0	0	2	0	0	0	3	1	2	999	999	1	0	11	7	0	4	999	999	999	999	999
77	20	1	0	0	0	0	3	2	3	0	0	0	0	3	0	0	999	999	1	0	11	3	3	5	999	999	999	999	999
78	18	1	0	3	2	1	0	0	2	0	1	0	0	3	0	0	999	999	1	0	12	5	5	2	999	999	999	999	999
79	18	1	0	0	0	2	2	0	2	0	0	0	0	2	2	2	999	999	1	0	12	8	2	2	999	999	999	999	999
80	18	1	0	3	0	0	3	0	0	0	0	0	0	3	0	3	999	999	1	0	12	6	3	3	999	999	999	999	999
81	18	1	0	1	0	1	0	0	2	2	3	2	0	0	0	2	999	999	1	0	13	6	5	2	999	999	999	999	999
82	18	1	0	3	0	0	0	0	3	0	1	3	0	3	0	0	999	999	1	0	13	4	9	0	999	999	999	999	999
83	19	1	0	3	0	1	1	0	3	0	3	0	1	0	1	0	999	999	1	0	13	6	6	1	999	999	999	999	999
84	19	1	0	3	0	1	1	0	3	0	1	1	0	3	1	0	999	999	1	0	14	6	7	1	999	999	999	999	999
85	20	1	0	1	1	1	1	0	3	1	0	3	0	0	1	2	999	999	1	0	14	4	7	3	999	999	999	999	999
86	19	1	0	0	1	3	1	1	3	1	0	0	0	0	1	3	999	999	1	0	14	7	3	4	999	999	999	999	999
87	18	1	0	3	0	0	0	0	3	0	0	3	0	3	0	3	999	999	1	0	15	6	9	0	999	999	999	999	999
88	18	1	0	3	3	1	1	0	3	1	1	0	0	0	1	1	999	999	1	0	15	4	6	5	999	999	999	999	999
89	19	1	0	0	0	1	1	3	3	0	1	3	1	2	0	0	999	999	1	0	15	5	6	4	999	999	999	999	999
90	17	1	0	0	2	1	3	3	2	0	0	0	1	2	1	0	999	999	1	0	15	5	2	8	999	999	999	999	999
91	18	1	0	1	0	0	0	0	3	0	0	3	0	3	3	3	999	999	1	0	16	9	7	0	999	999	999	999	999
92	18	1	0	1	0	0	0	0	3	0	0	3	0	3	3	3	999	999	1	0	16	9	7	0	999	999	999	999	999
93	18	1	0	1	0	0	0	0	3	0	0	3	0	3	3	3	999	999	1	0	16	9	7	0	999	999	999	999	999
94	20	1	0	0	0	0	0	0	3	1	3	3	1	2	3	0	999	999	1	0	16	9	6	1	999	999	999	999	999
95	18	1	0	1	1	3	1	0	2	1	1	1	0	3	1	1	999	999	1	0	16	9	4	3	999	999	999	999	999
96	18	1	0	0	1	0	1	2	3	3	1	0	0	3	1	1	999	999	1	0	16	6	3	7	999	999	999	999	999
97	18	1	0	3	0	3	0	1	2	1	0	0	0	3	3	1	999	999	1	0	17	10	5	2	999	999	999	999	999
98	18	1	0	3	0	0	0	3	2	0	0	3	0	2	1	3	999	999	1	0	17	6	8	3	999	999	999	999	999
99	18	1	0	0	3	3	1	0	3	0	0	3	0	3	1	0	999	999	1	0	17	7	6	4	999	999	999	999	999
100	22	1	0	3	1	1	3	0	0	2	1	0	0	2	2	2	999	999	1	0	17	8	3	6	999	999	999	999	999
101	18	1	0	0	3	3	0	3	3	0	0	0	0	3	0	3	999	999	1	0	18	9	3	6	999	999	999	999	999
102	18	1	0	0	0	0	1	2	3	0	0	0	3	3	3	3	999	999	1	0	18	12	3	3	999	999	999	999	999
103	27	1	0	0	2	1	2	3	1	1	3	3	1	0	1	0	999	999	1	0	18	6	4	8	999	999	999	999	999
104	18	1	0	3	1	3	1	0	2	1	1	0	1	3	0	3	999	999	1	0	19	11	5	3	999	999	999	999	999
105	18	1	0	0	2	2	1	0	3	0	0	3	2	3	0	3	999	999	1	0	19	10	6	3	999	999	999	999	999
106	24	1	0	3	3	3	2	0	2	2	1	0	0	2	1	0	999	999	1	0	19	7	5	7	999	999	999	999	999
107	18	1	0	1	2	1	3	2	2	0	3	1	2	0	3	1	999	999	1	0	21	10	4	7	999	999	999	999	999
108	18	1	0	0	3	3	3	3	3	0	0	0	0	3	3	0	999	999	1	0	21	9	3	9	999	999	999	999	999
109	18	1	0	0	0	0	3	3	3	0	0	0	3	3	3	3	999	999	1	0	21	12	3	6	999	999	999	999	999
110	20	1	0	2	2	2	1	3	3	0	0	0	1	2	3	3	999	999	1	0	22	11	5	6	999	999	999	999	999
111	18	1	0	0	3	3	0	0	2	2	2	2	0	3	3	3	999	999	1	0	23	14	4	5	999	999	999	999	999
112	18	1	0	0	0	0	3	0	2	3	3	2	2	3	2	3	999	999	1	0	23	13	4	6	999	999	999	999	999
113	19	1	0	0	3	1	3	3	3	3	3	3	0	0	0	1	999	999	1	0	23	5	6	12	999	999	999	999	999
114	20	1	0	3	0	1	0	0	3	1	1	3	3	3	3	3	999	999	1	0	24	14	9	1	999	999	999	999	999
115	18	1	0	2	3	3	3	3	2	1	0	2	3	0	0	3	999	999	1	0	25	9	6	10	999	999	999	999	999
116	18	1	0	3	0	3	3	0	1	2	0	3	3	3	3	3	999	999	1	0	27	15	7	5	999	999	999	999	999
117	18	1	0	3	3	3	3	0	3	1	0	3	0	2	3	3	999	999	1	0	27	11	9	7	999	999	999	999	999
118	19	1	0	3	1	3	3	0	3	3	3	0	2	2	2	3	999	999	1	0	28	15	6	7	999	999	999	999	999
119	18	1	0	1	1	0	0	0	0	0	0	0	0	0	0	0	999	999	1	0	2	0	1	1	999	999	999	999	999
120	18	1	0	1	1	0	0	0	0	0	0	0	0	0	0	0	999	999	1	0	2	0	1	1	999	999	999	999	999
121	18	1	0	0	2	0	0	0	2	0	0	0	0	0	0	1	999	999	1	0	5	1	2	2	999	999	999	999	999
122	19	1	0	0	0	0	1	0	1	0	0	0	0	3	0	0	999	999	1	0	5	3	1	1	999	999	999	999	999
123	19	1	0	0	0	0	1	0	1	0	0	0	0	3	0	0	999	999	1	0	5	3	1	1	999	999	999	999	999
124	19	1	0	3	1	1	1	0	1	0	0	0	0	1	0	0	999	999	1	0	8	2	4	2	999	999	999	999	999
125	18	1	0	0	0	1	1	3	0	0	1	0	0	0	1	1	999	999	1	0	8	4	0	4	999	999	999	999	999
126	22	1	0	0	0	3	0	0	3	0	0	0	0	0	3	0	999	999	1	0	9	6	3	0	999	999	999	999	999
127	18	1	0	0	2	3	2	0	0	2	0	0	0	3	0	2	999	999	1	0	14	8	0	6	999	999	999	999	999
128	26	0	0	0	0	0	0	0	0	0	0	0	0	0	0	0	999	999	1	0	0	0	0	0	999	999	999	999	999
129	35	0	0	0	0	0	0	0	0	0	0	0	0	0	0	0	999	999	1	0	0	0	0	0	999	999	999	999	999
130	35	0	0	0	0	0	0	0	0	0	0	0	0	0	0	0	999	999	1	0	0	0	0	0	999	999	999	999	999
131	45	0	0	0	0	0	0	0	0	0	0	0	0	0	0	0	999	999	1	0	0	0	0	0	999	999	999	999	999
132	31	0	0	0	0	0	0	0	0	0	0	0	0	0	0	0	999	999	1	0	0	0	0	0	999	999	999	999	999
133	20	0	0	0	0	0	0	0	0	0	0	0	0	0	0	0	999	999	1	0	0	0	0	0	999	999	999	999	999
134	18	0	0	0	0	0	0	0	1	0	0	0	0	0	0	0	999	999	1	0	1	0	1	0	999	999	999	999	999
135	27	0	0	0	0	0	0	1	0	0	0	0	0	0	0	0	999	999	1	0	1	0	0	1	999	999	999	999	999
136	20	0	0	0	0	0	0	0	2	0	0	0	0	0	0	0	999	999	1	0	2	0	2	0	999	999	999	999	999
137	32	0	0	0	0	0	0	0	2	0	0	0	0	0	0	0	999	999	1	0	2	0	2	0	999	999	999	999	999
138	19	0	0	0	0	0	0	2	0	0	0	0	0	0	0	0	999	999	1	0	2	0	0	2	999	999	999	999	999
139	19	0	0	0	1	0	1	0	0	0	0	0	0	0	0	0	999	999	1	0	2	0	0	2	999	999	999	999	999
140	18	0	0	3	0	0	0	0	0	0	0	0	0	0	0	0	999	999	1	0	3	0	3	0	999	999	999	999	999
141	18	0	0	0	0	3	0	0	0	0	0	0	0	0	0	0	999	999	1	0	3	3	0	0	999	999	999	999	999
142	18	0	0	2	0	0	0	0	0	0	0	0	0	1	0	0	999	999	1	0	3	1	2	0	999	999	999	999	999
143	17	0	0	0	0	0	0	0	0	0	0	0	0	3	0	0	999	999	1	0	3	3	0	0	999	999	999	999	999
144	18	0	0	0	0	0	0	0	0	0	0	0	0	3	0	0	999	999	1	0	3	3	0	0	999	999	999	999	999
145	20	0	0	0	0	0	0	0	1	0	0	0	0	2	0	0	999	999	1	0	3	2	1	0	999	999	999	999	999
146	18	0	0	1	0	0	0	0	2	0	0	0	0	0	0	0	999	999	1	0	3	0	3	0	999	999	999	999	999
147	33	0	0	0	0	0	0	0	3	0	0	0	0	0	0	0	999	999	1	0	3	0	3	0	999	999	999	999	999
148	20	0	0	0	1	0	0	1	1	0	0	0	0	0	0	0	999	999	1	0	3	0	1	2	999	999	999	999	999
149	28	0	0	0	0	0	0	3	0	0	0	0	0	0	0	0	999	999	1	0	3	0	0	3	999	999	999	999	999
150	21	0	0	0	0	0	0	3	0	0	0	0	0	0	0	0	999	999	1	0	3	0	0	3	999	999	999	999	999
151	18	0	0	0	0	0	1	0	2	0	0	0	0	0	0	0	999	999	1	0	3	0	2	1	999	999	999	999	999
152	21	0	0	0	0	0	0	0	0	0	0	0	0	3	1	0	999	999	1	0	4	4	0	0	999	999	999	999	999
153	17	0	0	0	0	0	0	0	1	0	0	0	0	3	0	0	999	999	1	0	4	3	1	0	999	999	999	999	999
154	18	0	0	0	0	0	0	0	1	0	0	0	0	3	0	0	999	999	1	0	4	3	1	0	999	999	999	999	999
155	32	0	0	0	0	0	0	0	2	0	0	0	0	0	0	2	999	999	1	0	4	2	2	0	999	999	999	999	999
156	18	0	0	0	0	0	0	0	3	0	0	0	0	0	1	0	999	999	1	0	4	1	3	0	999	999	999	999	999
157	22	0	0	0	0	0	0	0	3	0	0	0	0	1	0	0	999	999	1	0	4	1	3	0	999	999	999	999	999
158	17	0	0	0	0	0	0	1	0	0	1	0	0	0	0	2	999	999	1	0	4	3	0	1	999	999	999	999	999
159	28	0	0	1	0	0	0	1	2	0	0	0	0	0	0	0	999	999	1	0	4	0	3	1	999	999	999	999	999
160	20	0	0	0	1	0	0	1	2	0	0	0	0	0	0	0	999	999	1	0	4	0	2	2	999	999	999	999	999
161	41	0	0	0	0	0	0	1	3	0	0	0	0	0	0	0	999	999	1	0	4	0	3	1	999	999	999	999	999
162	17	0	0	0	0	0	0	2	2	0	0	0	0	0	0	0	999	999	1	0	4	0	2	2	999	999	999	999	999
163	18	0	0	0	1	1	1	0	0	0	0	0	1	0	0	0	999	999	1	0	4	2	0	2	999	999	999	999	999
164	42	0	0	0	0	0	1	0	0	0	0	3	0	0	0	0	999	999	1	0	4	0	3	1	999	999	999	999	999
165	18	0	0	0	0	0	1	3	0	0	0	0	0	0	0	0	999	999	1	0	4	0	0	4	999	999	999	999	999
166	20	0	0	1	0	0	0	0	0	0	0	0	0	3	0	1	999	999	1	0	5	4	1	0	999	999	999	999	999
167	24	0	0	3	0	0	0	0	0	0	0	1	0	0	0	1	999	999	1	0	5	1	4	0	999	999	999	999	999
168	20	0	0	3	0	0	0	0	2	0	0	0	0	0	0	0	999	999	1	0	5	0	5	0	999	999	999	999	999
169	19	0	0	0	0	1	0	0	2	1	0	0	0	0	0	1	999	999	1	0	5	2	2	1	999	999	999	999	999
170	18	0	0	0	0	0	0	0	3	0	0	0	0	0	1	1	999	999	1	0	5	2	3	0	999	999	999	999	999
171	38	0	0	0	0	0	0	0	3	0	0	0	0	0	0	2	999	999	1	0	5	2	3	0	999	999	999	999	999
172	18	0	0	1	3	0	0	1	0	0	0	0	0	0	0	0	999	999	1	0	5	0	1	4	999	999	999	999	999
173	55	0	0	0	0	0	0	3	0	0	0	2	0	0	0	0	999	999	1	0	5	0	2	3	999	999	999	999	999
174	18	0	0	0	0	1	2	0	0	0	0	0	0	0	2	0	999	999	1	0	5	3	0	2	999	999	999	999	999
175	20	0	0	3	0	0	0	0	0	0	0	0	0	0	0	3	999	999	1	0	6	3	3	0	999	999	999	999	999
176	17	0	0	1	0	3	0	0	0	0	0	0	0	2	0	0	999	999	1	0	6	5	1	0	999	999	999	999	999
177	19	0	0	0	0	0	0	0	0	0	0	0	0	3	0	3	999	999	1	0	6	6	0	0	999	999	999	999	999
178	20	0	0	1	3	0	0	0	2	0	0	0	0	0	0	0	999	999	1	0	6	0	3	3	999	999	999	999	999
179	18	0	0	0	0	1	0	0	2	0	0	0	0	0	1	2	999	999	1	0	6	4	2	0	999	999	999	999	999
180	19	0	0	1	0	0	0	0	3	0	0	0	0	0	1	1	999	999	1	0	6	2	4	0	999	999	999	999	999
181	17	0	0	0	0	0	0	0	3	0	0	0	0	3	0	0	999	999	1	0	6	3	3	0	999	999	999	999	999
182	38	0	0	0	0	0	0	2	0	0	0	0	0	2	0	2	999	999	1	0	6	4	0	2	999	999	999	999	999
183	19	0	0	3	1	1	1	0	0	0	0	0	0	0	0	0	999	999	1	0	6	1	3	2	999	999	999	999	999
184	20	0	0	0	0	1	1	0	3	0	0	0	0	0	0	1	999	999	1	0	6	2	3	1	999	999	999	999	999
185	20	0	0	0	2	2	2	0	0	0	0	0	0	0	0	0	999	999	1	0	6	2	0	4	999	999	999	999	999
186	18	0	0	0	0	0	0	0	0	0	1	3	0	3	0	0	999	999	1	0	7	4	3	0	999	999	999	999	999
187	18	0	0	0	1	0	0	0	2	0	0	0	0	1	2	1	999	999	1	0	7	4	2	1	999	999	999	999	999
188	18	0	0	0	1	0	0	0	3	0	0	0	0	3	0	0	999	999	1	0	7	3	3	1	999	999	999	999	999
189	19	0	0	0	0	0	0	0	3	0	0	0	3	0	0	1	999	999	1	0	7	4	3	0	999	999	999	999	999
190	47	0	0	0	0	0	0	0	3	0	0	2	0	0	0	2	999	999	1	0	7	2	5	0	999	999	999	999	999
191	18	0	0	0	0	1	0	0	3	0	0	2	0	1	0	0	999	999	1	0	7	2	5	0	999	999	999	999	999
192	18	0	0	0	0	0	0	0	3	0	0	2	1	0	0	1	999	999	1	0	7	2	5	0	999	999	999	999	999
193	21	0	0	0	2	2	0	3	0	0	0	0	0	0	0	0	999	999	1	0	7	2	0	5	999	999	999	999	999
194	18	0	0	2	0	0	0	3	2	0	0	0	0	0	0	0	999	999	1	0	7	0	4	3	999	999	999	999	999
195	18	0	0	0	0	0	1	0	0	0	3	0	0	0	3	0	999	999	1	0	7	6	0	1	999	999	999	999	999
196	20	0	0	3	2	0	1	0	1	0	0	0	0	0	0	0	999	999	1	0	7	0	4	3	999	999	999	999	999
197	18	0	0	0	0	1	1	0	2	0	0	0	0	1	1	1	999	999	1	0	7	4	2	1	999	999	999	999	999
198	18	0	0	0	0	1	1	0	3	0	0	0	1	0	1	0	999	999	1	0	7	3	3	1	999	999	999	999	999
199	18	0	0	0	0	1	1	0	3	0	1	0	0	0	1	0	999	999	1	0	7	3	3	1	999	999	999	999	999
200	19	0	0	0	1	0	0	0	1	0	0	3	0	2	0	1	999	999	1	0	8	3	4	1	999	999	999	999	999
201	19	0	0	1	0	0	0	0	2	0	0	3	0	2	0	0	999	999	1	0	8	2	6	0	999	999	999	999	999
202	28	0	0	3	0	0	0	0	3	0	0	0	0	0	0	2	999	999	1	0	8	2	6	0	999	999	999	999	999
203	19	0	0	0	0	0	0	0	3	0	0	0	0	1	1	3	999	999	1	0	8	5	3	0	999	999	999	999	999
204	54	0	0	0	0	0	0	0	3	0	0	0	1	3	0	1	999	999	1	0	8	5	3	0	999	999	999	999	999
205	21	0	0	0	0	1	0	0	3	0	0	1	0	0	0	3	999	999	1	0	8	4	4	0	999	999	999	999	999
206	20	0	0	0	0	0	0	0	3	0	0	3	0	0	0	2	999	999	1	0	8	2	6	0	999	999	999	999	999
207	18	0	0	0	0	0	0	0	3	0	1	0	0	1	0	3	999	999	1	0	8	5	3	0	999	999	999	999	999
208	19	0	0	0	1	0	0	0	3	1	0	0	0	3	0	0	999	999	1	0	8	3	3	2	999	999	999	999	999
209	18	0	0	0	0	2	0	1	2	0	0	0	0	0	1	2	999	999	1	0	8	5	2	1	999	999	999	999	999
210	18	0	0	1	0	1	0	1	2	0	0	0	0	3	0	0	999	999	1	0	8	4	3	1	999	999	999	999	999
211	18	0	0	1	0	0	1	0	0	0	0	3	0	0	0	3	999	999	1	0	8	3	4	1	999	999	999	999	999
212	17	0	0	0	0	0	1	0	2	1	0	0	1	2	1	0	999	999	1	0	8	4	2	2	999	999	999	999	999
213	20	0	0	0	0	0	1	0	3	0	0	3	0	0	0	1	999	999	1	0	8	1	6	1	999	999	999	999	999
214	19	0	0	2	0	0	1	2	2	0	0	0	0	1	0	0	999	999	1	0	8	1	4	3	999	999	999	999	999
215	18	0	0	1	2	0	2	0	2	0	0	0	0	0	1	0	999	999	1	0	8	1	3	4	999	999	999	999	999
216	23	0	0	0	2	0	0	0	0	0	0	3	0	2	2	0	999	999	1	0	9	4	3	2	999	999	999	999	999
217	18	0	0	1	0	1	0	0	2	0	0	0	0	2	1	2	999	999	1	0	9	6	3	0	999	999	999	999	999
218	19	0	0	0	0	0	0	0	2	0	0	0	0	2	2	3	999	999	1	0	9	7	2	0	999	999	999	999	999
219	20	0	0	0	0	2	0	0	2	0	0	2	0	3	0	0	999	999	1	0	9	5	4	0	999	999	999	999	999
220	18	0	0	1	0	2	0	0	3	0	0	1	0	2	0	0	999	999	1	0	9	4	5	0	999	999	999	999	999
221	18	0	0	0	1	0	0	0	3	0	0	2	0	3	0	0	999	999	1	0	9	3	5	1	999	999	999	999	999
222	47	0	0	0	0	0	0	0	3	0	0	3	0	0	3	0	999	999	1	0	9	3	6	0	999	999	999	999	999
223	24	0	0	0	0	0	0	0	3	0	0	3	0	0	0	3	999	999	1	0	9	3	6	0	999	999	999	999	999
224	18	0	0	0	0	2	0	0	3	2	0	2	0	0	0	0	999	999	1	0	9	2	5	2	999	999	999	999	999
225	18	0	0	2	1	3	0	1	0	0	0	0	0	2	0	0	999	999	1	0	9	5	2	2	999	999	999	999	999
226	23	0	0	3	0	3	0	1	2	0	0	0	0	0	0	0	999	999	1	0	9	3	5	1	999	999	999	999	999
227	18	0	0	2	1	0	0	2	0	0	0	0	0	0	2	2	999	999	1	0	9	4	2	3	999	999	999	999	999
228	18	0	0	1	0	0	0	2	1	0	0	0	0	3	1	1	999	999	1	0	9	5	2	2	999	999	999	999	999
229	18	0	0	0	0	0	0	3	2	0	0	2	0	1	0	1	999	999	1	0	9	2	4	3	999	999	999	999	999
230	18	0	0	0	0	0	0	3	2	2	0	0	0	0	0	2	999	999	1	0	9	2	2	5	999	999	999	999	999
231	20	0	0	0	1	0	1	0	3	0	0	0	0	2	0	2	999	999	1	0	9	4	3	2	999	999	999	999	999
232	21	0	0	0	0	0	1	0	3	0	0	3	0	1	0	1	999	999	1	0	9	2	6	1	999	999	999	999	999
233	18	0	0	0	0	2	2	0	0	0	0	0	2	3	0	0	999	999	1	0	9	7	0	2	999	999	999	999	999
234	18	0	0	0	1	0	2	0	0	0	0	1	0	2	2	1	999	999	1	0	9	5	1	3	999	999	999	999	999
235	18	0	0	0	2	0	0	0	0	0	0	0	0	2	3	3	999	999	1	0	10	8	0	2	999	999	999	999	999
236	17	0	0	1	3	0	0	0	0	0	3	0	0	0	0	3	999	999	1	0	10	6	1	3	999	999	999	999	999
237	53	0	0	3	1	0	0	0	1	1	1	0	0	0	0	3	999	999	1	0	10	4	4	2	999	999	999	999	999
238	22	0	0	2	0	1	0	0	2	0	0	0	0	0	2	3	999	999	1	0	10	6	4	0	999	999	999	999	999
239	22	0	0	2	0	0	0	0	3	0	0	0	0	3	2	0	999	999	1	0	10	5	5	0	999	999	999	999	999
240	18	0	0	0	1	1	0	0	3	0	0	0	0	3	2	0	999	999	1	0	10	6	3	1	999	999	999	999	999
241	18	0	0	0	1	1	0	0	3	0	0	1	0	2	2	0	999	999	1	0	10	5	4	1	999	999	999	999	999
242	19	0	0	3	0	0	0	0	3	0	0	3	0	0	1	0	999	999	1	0	10	1	9	0	999	999	999	999	999
243	18	0	0	3	1	0	0	0	3	0	0	3	0	0	0	0	999	999	1	0	10	0	9	1	999	999	999	999	999
244	20	0	0	2	0	1	0	0	3	0	0	3	0	0	1	0	999	999	1	0	10	2	8	0	999	999	999	999	999
245	17	0	0	2	0	0	0	1	2	0	0	0	0	2	0	3	999	999	1	0	10	5	4	1	999	999	999	999	999
246	18	0	0	2	0	0	0	1	3	0	0	0	0	2	0	2	999	999	1	0	10	4	5	1	999	999	999	999	999
247	20	0	0	0	1	1	0	2	3	0	0	2	0	0	0	1	999	999	1	0	10	2	5	3	999	999	999	999	999
248	17	0	0	3	0	0	0	3	3	0	0	1	0	0	0	0	999	999	1	0	10	0	7	3	999	999	999	999	999
249	18	0	0	0	0	0	0	3	3	0	0	3	0	1	0	0	999	999	1	0	10	1	6	3	999	999	999	999	999
250	18	0	0	0	0	1	1	0	0	0	0	0	1	3	2	2	999	999	1	0	10	9	0	1	999	999	999	999	999
251	18	0	0	0	0	0	1	0	0	0	0	3	0	3	0	3	999	999	1	0	10	6	3	1	999	999	999	999	999
252	17	0	0	1	1	0	1	0	0	1	0	2	0	3	0	1	999	999	1	0	10	4	3	3	999	999	999	999	999
253	20	0	0	3	0	0	1	0	2	0	0	1	0	3	0	0	999	999	1	0	10	3	6	1	999	999	999	999	999
254	18	0	0	1	0	2	1	0	3	0	0	0	1	1	0	1	999	999	1	0	10	5	4	1	999	999	999	999	999
255	19	0	0	0	0	1	1	0	3	0	1	0	0	2	2	0	999	999	1	0	10	6	3	1	999	999	999	999	999
256	50	0	0	0	1	1	1	1	3	0	3	0	0	0	0	0	999	999	1	0	10	4	3	3	999	999	999	999	999
257	21	0	0	0	2	2	2	1	1	2	0	0	0	0	0	0	999	999	1	0	10	2	1	7	999	999	999	999	999
258	19	0	0	0	3	1	3	0	2	0	0	0	0	0	1	0	999	999	1	0	10	2	2	6	999	999	999	999	999
259	18	0	0	2	1	0	0	0	0	2	0	2	0	2	0	2	999	999	1	0	11	4	4	3	999	999	999	999	999
260	20	0	0	0	2	0	0	0	3	0	0	0	0	2	1	3	999	999	1	0	11	6	3	2	999	999	999	999	999
261	18	0	0	2	0	0	0	0	3	0	0	1	0	2	0	3	999	999	1	0	11	5	6	0	999	999	999	999	999
262	18	0	0	0	0	0	0	0	3	0	0	3	0	3	1	1	999	999	1	0	11	5	6	0	999	999	999	999	999
263	17	0	0	0	1	0	0	0	3	1	0	1	0	2	3	0	999	999	1	0	11	5	4	2	999	999	999	999	999
264	18	0	0	3	0	0	0	2	2	0	0	0	0	1	3	0	999	999	1	0	11	4	5	2	999	999	999	999	999
265	18	0	0	3	0	0	1	0	2	0	0	0	0	1	3	1	999	999	1	0	11	5	5	1	999	999	999	999	999
266	21	0	0	0	0	0	1	0	2	0	0	0	0	3	3	2	999	999	1	0	11	8	2	1	999	999	999	999	999
267	18	0	0	0	0	0	1	0	2	0	0	2	1	1	1	3	999	999	1	0	11	6	4	1	999	999	999	999	999
268	18	0	0	0	1	0	1	0	2	0	0	3	1	2	0	1	999	999	1	0	11	4	5	2	999	999	999	999	999
269	18	0	0	0	0	3	1	0	2	0	1	0	1	3	0	0	999	999	1	0	11	8	2	1	999	999	999	999	999
270	17	0	0	0	0	3	1	0	2	0	1	0	1	3	0	0	999	999	1	0	11	8	2	1	999	999	999	999	999
271	18	0	0	3	0	0	1	0	3	0	0	0	0	3	0	1	999	999	1	0	11	4	6	1	999	999	999	999	999
272	20	0	0	2	0	0	1	1	2	0	0	2	0	3	0	0	999	999	1	0	11	3	6	2	999	999	999	999	999
273	25	0	0	2	1	2	2	0	2	0	0	0	0	0	0	2	999	999	1	0	11	4	4	3	999	999	999	999	999
274	18	0	0	0	1	0	2	0	2	0	0	0	0	2	2	2	999	999	1	0	11	6	2	3	999	999	999	999	999
275	19	0	0	0	0	0	2	0	2	0	1	2	1	2	1	0	999	999	1	0	11	5	4	2	999	999	999	999	999
276	17	0	0	0	0	1	3	0	2	1	0	0	0	2	1	1	999	999	1	0	11	5	2	4	999	999	999	999	999
277	18	0	0	3	2	2	0	0	3	0	0	0	0	1	0	1	999	999	1	0	12	4	6	2	999	999	999	999	999
278	19	0	0	0	0	2	0	0	3	0	0	0	0	2	3	2	999	999	1	0	12	9	3	0	999	999	999	999	999
279	18	0	0	3	3	0	0	0	3	0	0	0	0	3	0	0	999	999	1	0	12	3	6	3	999	999	999	999	999
280	20	0	0	3	2	2	0	0	3	0	0	1	0	0	0	1	999	999	1	0	12	3	7	2	999	999	999	999	999
281	19	0	0	3	1	0	0	0	3	0	0	1	0	2	1	1	999	999	1	0	12	4	7	1	999	999	999	999	999
282	19	0	0	1	1	0	0	0	3	0	1	0	0	3	3	0	999	999	1	0	12	7	4	1	999	999	999	999	999
283	18	0	0	0	0	0	0	0	3	0	1	3	0	3	0	2	999	999	1	0	12	6	6	0	999	999	999	999	999
284	19	0	0	0	0	0	0	0	3	1	1	0	0	1	3	3	999	999	1	0	12	8	3	1	999	999	999	999	999
285	19	0	0	3	0	0	0	1	2	0	0	3	0	0	0	3	999	999	1	0	12	3	8	1	999	999	999	999	999
286	20	0	0	0	2	0	0	1	2	1	0	0	0	3	0	3	999	999	1	0	12	6	2	4	999	999	999	999	999
287	18	0	0	0	0	3	0	1	3	1	1	0	0	0	3	0	999	999	1	0	12	7	3	2	999	999	999	999	999
288	19	0	0	3	0	0	1	0	3	0	0	0	1	2	1	1	999	999	1	0	12	5	6	1	999	999	999	999	999
289	18	0	0	0	0	1	1	0	3	0	1	0	0	2	1	3	999	999	1	0	12	8	3	1	999	999	999	999	999
290	18	0	0	0	1	0	1	3	2	0	0	2	0	0	2	1	999	999	1	0	12	3	4	5	999	999	999	999	999
291	19	0	0	0	1	0	1	3	3	0	0	0	0	0	2	2	999	999	1	0	12	4	3	5	999	999	999	999	999
292	22	0	0	3	0	2	3	0	3	0	0	0	0	0	0	1	999	999	1	0	12	3	6	3	999	999	999	999	999
293	20	0	0	0	0	0	3	1	3	0	0	0	0	3	2	0	999	999	1	0	12	5	3	4	999	999	999	999	999
294	19	0	0	2	0	1	0	0	1	0	0	3	0	0	3	3	999	999	1	0	13	7	6	0	999	999	999	999	999
295	20	0	0	0	0	0	0	0	3	0	0	3	0	1	3	3	999	999	1	0	13	7	6	0	999	999	999	999	999
296	18	0	0	0	0	2	0	0	3	0	1	3	1	0	3	0	999	999	1	0	13	7	6	0	999	999	999	999	999
297	18	0	0	3	3	0	0	2	3	0	0	0	0	2	0	0	999	999	1	0	13	2	6	5	999	999	999	999	999
298	22	0	0	3	0	1	1	0	0	0	0	3	0	3	0	2	999	999	1	0	13	6	6	1	999	999	999	999	999
299	18	0	0	0	0	2	1	0	3	0	0	0	3	2	0	2	999	999	1	0	13	9	3	1	999	999	999	999	999
300	18	0	0	2	2	0	2	0	2	1	0	2	0	0	0	2	999	999	1	0	13	2	6	5	999	999	999	999	999
301	17	0	0	3	0	3	0	0	0	0	0	3	0	2	3	0	999	999	1	0	14	8	6	0	999	999	999	999	999
302	19	0	0	3	1	0	0	0	3	0	0	3	0	3	0	1	999	999	1	0	14	4	9	1	999	999	999	999	999
303	19	0	0	3	0	0	0	0	3	1	0	3	0	3	0	1	999	999	1	0	14	4	9	1	999	999	999	999	999
304	18	0	0	0	0	1	0	2	2	0	0	3	0	3	1	2	999	999	1	0	14	7	5	2	999	999	999	999	999
305	20	0	0	0	0	0	0	2	3	0	1	3	0	2	0	3	999	999	1	0	14	6	6	2	999	999	999	999	999
306	18	0	0	0	1	0	0	3	3	1	3	0	0	2	1	0	999	999	1	0	14	6	3	5	999	999	999	999	999
307	18	0	0	3	3	0	1	0	0	3	0	0	0	3	1	0	999	999	1	0	14	4	3	7	999	999	999	999	999
308	19	0	0	1	1	0	1	0	2	1	0	2	0	3	0	3	999	999	1	0	14	6	5	3	999	999	999	999	999
309	18	0	0	0	1	1	1	0	3	1	0	0	3	2	1	1	999	999	1	0	14	8	3	3	999	999	999	999	999
310	18	0	0	2	2	2	2	0	0	0	0	0	0	0	3	3	999	999	1	0	14	8	2	4	999	999	999	999	999
311	24	0	0	0	3	0	2	2	2	3	0	0	0	0	0	2	999	999	1	0	14	2	2	10	999	999	999	999	999
312	19	0	0	0	0	0	3	0	2	3	0	0	0	0	3	3	999	999	1	0	14	6	2	6	999	999	999	999	999
313	18	0	0	3	3	3	0	0	2	0	0	0	0	0	3	1	999	999	1	0	15	7	5	3	999	999	999	999	999
314	18	0	0	3	0	0	0	0	3	0	0	3	0	3	3	0	999	999	1	0	15	6	9	0	999	999	999	999	999
315	19	0	0	3	0	0	0	0	3	1	1	1	0	3	0	3	999	999	1	0	15	7	7	1	999	999	999	999	999
316	18	0	0	0	1	1	1	0	3	0	0	2	0	2	2	3	999	999	1	0	15	8	5	2	999	999	999	999	999
317	17	0	0	0	1	3	1	0	3	1	0	0	0	3	0	3	999	999	1	0	15	9	3	3	999	999	999	999	999
318	17	0	0	1	0	1	1	3	2	1	0	0	1	2	0	3	999	999	1	0	15	7	3	5	999	999	999	999	999
319	18	0	0	0	0	0	3	1	3	0	0	3	2	3	0	0	999	999	1	0	15	5	6	4	999	999	999	999	999
320	18	0	0	0	1	3	0	0	3	3	0	0	0	2	1	3	999	999	1	0	16	9	3	4	999	999	999	999	999
321	19	0	0	0	1	0	0	1	3	0	1	0	2	3	2	3	999	999	1	0	16	11	3	2	999	999	999	999	999
322	19	0	0	2	0	3	1	0	2	0	0	3	0	0	3	2	999	999	1	0	16	8	7	1	999	999	999	999	999
323	18	0	0	2	1	0	1	0	3	1	0	3	0	2	0	3	999	999	1	0	16	5	8	3	999	999	999	999	999
324	18	0	0	3	0	0	1	1	2	2	1	3	2	0	1	0	999	999	1	0	16	4	8	4	999	999	999	999	999
325	20	0	0	0	0	2	1	1	3	1	0	3	0	3	2	0	999	999	1	0	16	7	6	3	999	999	999	999	999
326	16	0	0	0	3	0	1	2	3	1	0	3	0	0	3	0	999	999	1	0	16	3	6	7	999	999	999	999	999
327	18	0	0	1	0	3	2	0	1	3	2	1	0	3	0	0	999	999	1	0	16	8	3	5	999	999	999	999	999
328	17	0	0	3	1	1	2	0	2	0	2	1	0	3	1	0	999	999	1	0	16	7	6	3	999	999	999	999	999
329	18	0	0	3	1	0	2	1	3	2	0	0	0	0	2	2	999	999	1	0	16	4	6	6	999	999	999	999	999
330	22	0	0	3	1	0	3	0	0	2	0	2	0	3	0	2	999	999	1	0	16	5	5	6	999	999	999	999	999
331	17	0	0	1	3	2	0	0	2	0	1	2	0	2	1	3	999	999	1	0	17	9	5	3	999	999	999	999	999
332	18	0	0	0	3	0	0	0	3	1	1	1	0	2	3	3	999	999	1	0	17	9	4	4	999	999	999	999	999
333	22	0	0	0	2	2	0	2	3	0	0	3	0	3	0	2	999	999	1	0	17	7	6	4	999	999	999	999	999
334	19	0	0	3	0	1	1	0	3	0	0	3	3	0	1	2	999	999	1	0	17	7	9	1	999	999	999	999	999
335	17	0	0	3	1	1	1	0	3	0	1	3	1	0	2	1	999	999	1	0	17	6	9	2	999	999	999	999	999
336	18	0	0	0	1	3	1	1	3	1	0	0	0	3	3	1	999	999	1	0	17	10	3	4	999	999	999	999	999
337	18	0	0	3	2	0	2	0	0	3	2	0	0	0	2	3	999	999	1	0	17	7	3	7	999	999	999	999	999
338	18	0	0	0	3	3	2	0	3	3	0	0	0	0	0	3	999	999	1	0	17	6	3	8	999	999	999	999	999
339	18	0	0	3	1	2	1	1	1	1	1	1	0	3	2	1	999	999	1	0	18	9	5	4	999	999	999	999	999
340	19	0	0	3	1	3	1	2	0	1	1	3	0	3	0	0	999	999	1	0	18	7	6	5	999	999	999	999	999
341	18	0	0	2	3	0	2	3	2	2	0	0	0	2	2	0	999	999	1	0	18	4	4	10	999	999	999	999	999
342	19	0	0	0	3	3	3	0	3	0	0	0	0	3	3	0	999	999	1	0	18	9	3	6	999	999	999	999	999
343	19	0	0	0	0	2	3	3	3	1	3	0	0	3	0	0	999	999	1	0	18	8	3	7	999	999	999	999	999
344	18	0	0	3	0	1	0	3	3	0	0	0	0	3	3	3	999	999	1	0	19	10	6	3	999	999	999	999	999
345	28	0	0	3	2	0	0	3	3	3	0	0	0	2	0	3	999	999	1	0	19	5	6	8	999	999	999	999	999
346	29	0	0	3	3	0	1	0	3	0	0	0	0	3	3	3	999	999	1	0	19	9	6	4	999	999	999	999	999
347	19	0	0	0	1	0	1	1	3	3	1	3	0	3	0	3	999	999	1	0	19	7	6	6	999	999	999	999	999
348	19	0	0	0	3	0	2	2	2	2	3	2	0	0	0	3	999	999	1	0	19	6	4	9	999	999	999	999	999
349	18	0	0	3	0	0	3	1	3	0	0	3	0	3	3	0	999	999	1	0	19	6	9	4	999	999	999	999	999
350	18	0	0	0	1	3	3	1	3	1	0	0	1	3	3	0	999	999	1	0	19	10	3	6	999	999	999	999	999
351	18	0	0	3	1	1	1	1	3	0	1	3	0	3	1	2	999	999	1	0	20	8	9	3	999	999	999	999	999
352	18	0	0	3	2	3	2	0	2	0	0	2	0	0	3	3	999	999	1	0	20	9	7	4	999	999	999	999	999
353	48	0	0	0	3	3	2	3	3	0	0	3	0	0	0	3	999	999	1	0	20	6	6	8	999	999	999	999	999
354	18	0	0	0	3	1	3	0	3	1	1	0	0	2	3	3	999	999	1	0	20	10	3	7	999	999	999	999	999
355	19	0	0	3	2	0	3	1	0	3	0	0	0	3	2	3	999	999	1	0	20	8	3	9	999	999	999	999	999
356	21	0	0	0	0	3	3	3	0	2	3	3	0	3	0	0	999	999	1	0	20	9	3	8	999	999	999	999	999
357	22	0	0	3	2	2	0	0	3	0	0	3	0	2	3	3	999	999	1	0	21	10	9	2	999	999	999	999	999
358	18	0	0	3	2	0	0	2	2	0	2	3	1	0	3	3	999	999	1	0	21	9	8	4	999	999	999	999	999
359	22	0	0	3	0	0	0	3	3	0	0	3	0	3	3	3	999	999	1	0	21	9	9	3	999	999	999	999	999
360	18	0	0	1	2	3	1	1	0	3	1	2	0	3	1	3	999	999	1	0	21	11	3	7	999	999	999	999	999
361	20	0	0	3	0	0	3	1	0	0	0	3	2	3	3	3	999	999	1	0	21	11	6	4	999	999	999	999	999
362	18	0	0	0	2	0	3	0	2	3	1	2	3	2	2	2	999	999	1	0	22	10	4	8	999	999	999	999	999
363	18	0	0	1	1	3	3	0	3	1	3	3	1	1	1	1	999	999	1	0	22	10	7	5	999	999	999	999	999
364	28	0	0	3	3	0	3	3	3	1	0	0	0	1	3	2	999	999	1	0	22	6	6	10	999	999	999	999	999
365	18	0	0	3	0	0	0	3	3	2	2	3	2	2	2	2	999	999	1	0	24	10	9	5	999	999	999	999	999
366	18	0	0	3	3	3	1	1	0	1	0	3	1	3	3	2	999	999	1	0	24	12	6	6	999	999	999	999	999
367	30	0	0	2	0	2	2	1	2	3	2	3	0	3	3	2	999	999	1	0	25	12	7	6	999	999	999	999	999
368	20	0	0	0	1	2	2	2	3	1	0	3	3	3	3	2	999	999	1	0	25	13	6	6	999	999	999	999	999
369	18	0	0	3	0	2	2	0	3	2	3	2	2	3	2	2	999	999	1	0	26	14	8	4	999	999	999	999	999
370	19	0	0	3	1	1	3	3	3	0	1	2	0	3	3	3	999	999	1	0	26	11	8	7	999	999	999	999	999
371	20	0	0	2	3	3	3	3	3	3	0	3	0	0	0	3	999	999	1	0	26	6	8	12	999	999	999	999	999
372	17	0	0	3	3	3	3	1	3	3	3	0	3	0	0	3	999	999	1	0	28	12	6	10	999	999	999	999	999
373	17	0	0	0	3	3	3	3	3	1	1	3	3	0	2	3	999	999	1	0	28	12	6	10	999	999	999	999	999
374	17	0	0	3	3	0	3	3	3	3	3	3	0	3	3	3	999	999	1	0	33	12	9	12	999	999	999	999	999
375	19	0	0	1	0	3	2	0	2	0	0	0	0	0	3	0	999	999	1	0	11	6	3	2	999	999	999	999	999
376	18	0	0	3	0	2	2	0	3	1	1	3	0	0	0	1	999	999	1	0	16	4	9	3	999	999	999	999	999
377	17	1	1	0	0	1	0	0	0	0	0	0	0	0	0	0	999	999	1	0	2	2	0	0	999	999	999	999	999
378	25	1	1	0	0	0	0	0	0	0	0	0	1	0	1	0	999	999	1	0	3	3	0	0	999	999	999	999	999
379	19	1	1	0	0	0	0	0	0	0	0	0	0	3	0	0	999	999	1	0	4	4	0	0	999	999	999	999	999
380	18	1	1	2	0	0	0	1	0	0	0	0	0	1	0	0	999	999	1	0	5	2	2	1	999	999	999	999	999
381	18	1	1	0	0	1	0	0	0	0	0	0	1	2	1	0	999	999	1	0	6	6	0	0	999	999	999	999	999
382	35	1	1	0	3	0	1	0	0	0	0	1	0	0	0	0	999	999	1	0	6	1	1	4	999	999	999	999	999
383	18	1	1	0	0	0	0	0	0	0	0	0	0	2	1	3	999	999	1	0	7	7	0	0	999	999	999	999	999
384	18	1	1	0	0	1	0	0	1	0	0	1	1	0	1	1	999	999	1	0	7	5	2	0	999	999	999	999	999
385	21	1	1	0	0	0	0	0	2	0	0	0	0	3	0	1	999	999	1	0	7	5	2	0	999	999	999	999	999
386	18	1	1	0	0	1	0	0	2	1	0	0	0	2	0	0	999	999	1	0	7	4	2	1	999	999	999	999	999
387	22	1	1	0	1	1	1	0	0	1	0	0	1	0	0	1	999	999	1	0	7	4	0	3	999	999	999	999	999
388	20	1	1	3	1	1	0	0	0	0	0	0	1	0	0	1	999	999	1	0	8	4	3	1	999	999	999	999	999
389	18	1	1	0	0	1	0	0	1	0	0	0	1	3	0	1	999	999	1	0	8	7	1	0	999	999	999	999	999
390	17	1	1	0	0	0	0	0	2	0	0	0	1	2	2	0	999	999	1	0	8	6	2	0	999	999	999	999	999
391	23	1	1	0	0	1	0	0	2	0	1	0	0	1	1	1	999	999	1	0	8	6	2	0	999	999	999	999	999
392	18	1	1	0	0	1	0	2	2	0	0	0	1	0	1	0	999	999	1	0	8	4	2	2	999	999	999	999	999
393	18	1	1	0	0	1	1	1	0	1	0	0	0	3	0	0	999	999	1	0	8	5	0	3	999	999	999	999	999
394	21	1	1	0	1	1	0	1	0	0	0	0	1	3	1	0	999	999	1	0	9	7	0	2	999	999	999	999	999
395	18	1	1	0	0	2	1	0	0	0	0	0	1	0	1	3	999	999	1	0	9	8	0	1	999	999	999	999	999
396	25	1	1	3	1	1	1	1	1	0	0	0	0	0	0	0	999	999	1	0	9	2	4	3	999	999	999	999	999
397	20	1	1	0	0	0	1	3	0	0	0	0	0	0	2	2	999	999	1	0	9	5	0	4	999	999	999	999	999
398	18	1	1	0	1	3	0	0	0	0	0	0	0	2	3	0	999	999	1	0	10	9	0	1	999	999	999	999	999
399	18	1	1	0	0	3	0	0	1	0	0	1	1	1	1	1	999	999	1	0	10	8	2	0	999	999	999	999	999
400	21	1	1	0	0	0	0	0	1	0	2	0	3	1	2	0	999	999	1	0	10	9	1	0	999	999	999	999	999
401	19	1	1	3	1	0	0	0	1	1	0	0	0	2	0	1	999	999	1	0	10	4	4	2	999	999	999	999	999
402	19	1	1	1	0	0	0	0	2	0	0	0	1	1	2	2	999	999	1	0	10	7	3	0	999	999	999	999	999
403	25	1	1	0	0	0	0	0	2	0	1	0	1	2	1	2	999	999	1	0	10	8	2	0	999	999	999	999	999
404	32	1	1	0	1	1	0	0	3	1	0	0	0	1	1	1	999	999	1	0	10	5	3	2	999	999	999	999	999
405	20	1	1	0	0	0	0	1	3	0	0	3	0	2	0	0	999	999	1	0	10	3	6	1	999	999	999	999	999
406	20	1	1	0	1	0	1	0	1	0	0	3	0	0	2	1	999	999	1	0	10	4	4	2	999	999	999	999	999
407	21	1	1	0	1	1	1	1	1	0	0	0	2	0	1	1	999	999	1	0	10	6	1	3	999	999	999	999	999
408	21	1	1	0	0	1	1	1	3	1	0	0	1	1	0	0	999	999	1	0	10	4	3	3	999	999	999	999	999
409	19	1	1	0	1	1	0	0	0	3	1	0	1	0	0	3	999	999	1	0	11	7	0	4	999	999	999	999	999
410	19	1	1	0	0	3	0	0	3	0	0	0	1	0	3	0	999	999	1	0	11	8	3	0	999	999	999	999	999
411	17	1	1	3	0	1	0	0	3	0	0	0	1	1	0	1	999	999	1	0	11	5	6	0	999	999	999	999	999
412	20	1	1	0	1	0	0	3	2	0	1	0	0	3	0	0	999	999	1	0	11	5	2	4	999	999	999	999	999
413	17	1	1	0	1	3	1	0	2	0	1	0	1	0	1	0	999	999	1	0	11	7	2	2	999	999	999	999	999
414	20	1	1	0	0	3	0	0	3	0	1	0	0	3	1	0	999	999	1	0	12	9	3	0	999	999	999	999	999
415	20	1	1	0	2	1	0	2	3	0	0	0	1	0	2	0	999	999	1	0	12	5	3	4	999	999	999	999	999
416	19	1	1	0	0	0	0	3	2	0	0	0	1	2	0	3	999	999	1	0	12	7	2	3	999	999	999	999	999
417	18	1	1	0	0	3	1	1	2	0	1	0	0	0	1	2	999	999	1	0	12	8	2	2	999	999	999	999	999
418	20	1	1	0	1	1	1	1	3	2	0	0	1	0	0	1	999	999	1	0	12	4	3	5	999	999	999	999	999
419	24	1	1	0	0	1	0	0	3	0	1	3	1	3	0	0	999	999	1	0	13	7	6	0	999	999	999	999	999
420	17	1	1	0	1	1	0	1	2	0	0	0	1	2	1	3	999	999	1	0	13	9	2	2	999	999	999	999	999
421	19	1	1	0	0	1	0	3	2	0	0	0	0	1	2	3	999	999	1	0	13	8	2	3	999	999	999	999	999
422	42	1	1	0	1	1	1	3	3	1	0	0	0	0	0	2	999	999	1	0	13	4	3	6	999	999	999	999	999
423	23	1	1	0	0	1	0	0	3	0	0	0	0	3	3	3	999	999	1	0	14	11	3	0	999	999	999	999	999
424	19	1	1	3	0	3	0	0	3	0	1	0	0	0	0	3	999	999	1	0	14	8	6	0	999	999	999	999	999
425	20	1	1	0	0	0	0	0	3	0	1	3	0	3	0	3	999	999	1	0	14	8	6	0	999	999	999	999	999
426	18	1	1	1	1	3	1	3	1	1	0	0	0	1	0	1	999	999	1	0	14	6	2	6	999	999	999	999	999
427	20	1	1	0	1	1	3	0	3	1	3	0	0	0	1	0	999	999	1	0	14	6	3	5	999	999	999	999	999
428	18	1	1	0	1	2	3	1	1	0	1	1	1	1	1	0	999	999	1	0	14	7	2	5	999	999	999	999	999
429	20	1	1	3	0	3	0	0	3	0	0	1	0	1	2	1	999	999	1	0	15	8	7	0	999	999	999	999	999
430	18	1	1	3	1	0	0	2	1	1	1	1	1	1	1	1	999	999	1	0	15	6	5	4	999	999	999	999	999
431	18	1	1	2	0	1	0	2	3	0	1	0	1	2	1	1	999	999	1	0	15	8	5	2	999	999	999	999	999
432	19	1	1	0	1	2	1	0	3	0	0	0	1	2	2	2	999	999	1	0	15	10	3	2	999	999	999	999	999
433	22	1	1	2	1	1	0	2	0	0	1	2	1	0	2	3	999	999	1	0	16	9	4	3	999	999	999	999	999
434	18	1	1	3	0	1	0	3	2	0	0	0	0	1	2	3	999	999	1	0	16	8	5	3	999	999	999	999	999
435	18	1	1	0	0	1	1	1	3	1	1	0	1	2	2	2	999	999	1	0	16	10	3	3	999	999	999	999	999
436	19	1	1	0	1	3	3	2	0	1	0	3	1	0	1	0	999	999	1	0	16	6	3	7	999	999	999	999	999
437	18	1	1	0	2	2	2	0	0	2	0	0	0	3	2	3	999	999	1	0	17	11	0	6	999	999	999	999	999
438	17	1	1	0	0	1	3	0	3	3	3	0	0	0	3	0	999	999	1	0	17	8	3	6	999	999	999	999	999
439	18	1	1	3	1	1	1	1	2	1	0	2	0	0	2	3	999	999	1	0	18	7	7	4	999	999	999	999	999
440	18	1	1	3	1	1	0	1	3	1	1	3	1	2	1	0	999	999	1	0	19	7	9	3	999	999	999	999	999
441	18	1	1	2	1	3	0	2	2	0	2	2	1	2	0	1	999	999	1	0	19	10	6	3	999	999	999	999	999
442	19	1	1	2	2	3	2	0	2	2	0	0	1	0	1	3	999	999	1	0	19	9	4	6	999	999	999	999	999
443	18	1	1	0	0	0	3	3	3	0	0	0	0	3	3	3	999	999	1	0	19	10	3	6	999	999	999	999	999
444	18	1	1	0	3	3	0	2	3	0	0	3	0	2	1	2	999	999	1	0	20	9	6	5	999	999	999	999	999
445	18	1	1	3	2	2	1	1	2	2	1	0	1	2	2	0	999	999	1	0	20	9	5	6	999	999	999	999	999
446	22	1	1	1	3	1	1	2	1	1	0	3	2	2	2	0	999	999	1	0	20	8	5	7	999	999	999	999	999
447	19	1	1	0	3	2	2	1	2	0	0	3	0	3	0	3	999	999	1	0	20	9	5	6	999	999	999	999	999
448	19	1	1	0	2	3	2	3	0	2	0	2	1	0	2	2	999	999	1	0	20	9	2	9	999	999	999	999	999
449	18	1	1	0	3	3	3	0	3	3	0	2	0	0	3	0	999	999	1	0	21	7	5	9	999	999	999	999	999
450	17	1	1	0	0	3	3	1	2	2	2	3	1	0	0	3	999	999	1	0	21	10	5	6	999	999	999	999	999
451	18	1	1	3	2	1	2	2	0	0	2	1	2	2	1	3	999	999	1	0	22	12	4	6	999	999	999	999	999
452	19	1	1	0	0	3	3	2	0	1	3	0	3	2	3	1	999	999	1	0	22	16	0	6	999	999	999	999	999
453	18	1	1	3	0	3	1	0	3	0	0	3	3	1	3	3	999	999	1	0	24	14	9	1	999	999	999	999	999
454	24	1	1	2	0	1	2	3	3	1	3	1	0	3	1	3	999	999	1	0	24	12	6	6	999	999	999	999	999
455	20	1	1	3	0	3	3	0	3	3	2	3	3	0	0	0	999	999	1	0	24	9	9	6	999	999	999	999	999
456	18	1	1	1	3	3	2	3	2	3	2	0	1	1	2	3	999	999	1	0	27	13	3	11	999	999	999	999	999
457	20	1	1	3	0	3	1	1	3	1	3	3	2	3	3	2	999	999	1	0	29	17	9	3	999	999	999	999	999
458	23	1	1	3	2	3	2	3	3	1	3	1	3	2	1	1	999	999	1	0	29	14	7	8	999	999	999	999	999
459	18	1	1	2	3	3	3	0	3	2	3	3	3	3	2	0	999	999	1	0	31	15	8	8	999	999	999	999	999
460	18	1	1	0	1	1	0	1	0	0	0	0	0	3	0	2	999	999	1	0	9	7	0	2	999	999	999	999	999
461	18	1	1	2	0	0	1	3	0	0	0	0	0	1	0	1	999	999	1	0	9	3	2	4	999	999	999	999	999
462	20	1	1	0	3	3	1	3	2	1	3	0	1	0	1	1	999	999	1	0	20	10	2	8	999	999	999	999	999
463	18	1	1	2	3	0	3	2	0	3	3	1	0	2	1	0	999	999	1	0	21	7	3	11	999	999	999	999	999
464	19	1	1	3	3	1	1	1	2	1	1	3	1	1	1	3	999	999	1	0	23	9	8	6	999	999	999	999	999
465	19	1	1	3	3	1	1	1	2	1	1	3	1	1	1	3	999	999	1	0	23	9	8	6	999	999	999	999	999
466	17	0	1	0	0	0	0	0	0	0	0	0	0	0	2	0	999	999	1	0	3	3	0	0	999	999	999	999	999
467	18	0	1	0	0	0	1	0	0	0	1	0	0	0	0	0	999	999	1	0	3	2	0	1	999	999	999	999	999
468	18	0	1	0	0	0	0	0	3	0	0	0	0	0	0	0	999	999	1	0	4	1	3	0	999	999	999	999	999
469	21	0	1	0	0	0	0	0	0	0	0	0	0	3	1	0	999	999	1	0	5	5	0	0	999	999	999	999	999
470	17	0	1	0	0	0	0	0	3	0	0	0	1	0	0	0	999	999	1	0	5	2	3	0	999	999	999	999	999
471	18	0	1	0	0	0	0	2	2	0	0	0	0	0	0	0	999	999	1	0	5	1	2	2	999	999	999	999	999
472	18	0	1	0	0	1	1	0	0	0	0	0	0	0	1	1	999	999	1	0	5	4	0	1	999	999	999	999	999
473	18	0	1	0	0	0	0	0	3	0	0	0	1	0	1	0	999	999	1	0	6	3	3	0	999	999	999	999	999
474	27	0	1	0	0	0	0	0	3	0	2	0	0	0	0	0	999	999	1	0	6	3	3	0	999	999	999	999	999
475	19	0	1	0	0	0	1	1	2	0	0	0	0	1	0	0	999	999	1	0	6	2	2	2	999	999	999	999	999
476	18	0	1	0	0	1	0	0	2	0	0	0	2	0	1	0	999	999	1	0	7	5	2	0	999	999	999	999	999
477	22	0	1	0	0	1	0	0	3	0	0	0	0	1	0	1	999	999	1	0	7	4	3	0	999	999	999	999	999
478	18	0	1	0	0	0	0	0	3	0	0	0	0	2	0	1	999	999	1	0	7	4	3	0	999	999	999	999	999
479	19	0	1	2	0	0	0	3	0	0	0	0	0	1	0	0	999	999	1	0	7	2	2	3	999	999	999	999	999
480	18	0	1	0	0	0	1	2	2	1	0	0	0	0	0	0	999	999	1	0	7	1	2	4	999	999	999	999	999
481	20	0	1	0	0	0	0	0	2	0	0	0	1	3	1	0	999	999	1	0	8	6	2	0	999	999	999	999	999
482	19	0	1	0	0	1	0	2	3	0	0	0	0	1	0	0	999	999	1	0	8	3	3	2	999	999	999	999	999
483	20	0	1	0	0	0	0	2	3	0	0	0	1	1	0	0	999	999	1	0	8	3	3	2	999	999	999	999	999
484	18	0	1	0	3	0	1	0	0	0	3	0	0	0	0	0	999	999	1	0	8	4	0	4	999	999	999	999	999
485	23	0	1	3	1	1	1	1	0	0	0	0	0	0	0	0	999	999	1	0	8	2	3	3	999	999	999	999	999
486	20	0	1	1	0	0	1	1	2	0	0	0	0	2	0	0	999	999	1	0	8	3	3	2	999	999	999	999	999
487	18	0	1	0	0	1	0	0	2	0	1	0	0	1	3	0	999	999	1	0	9	7	2	0	999	999	999	999	999
488	18	0	1	0	0	2	0	0	3	0	1	0	0	0	1	1	999	999	1	0	9	6	3	0	999	999	999	999	999
489	20	0	1	0	1	0	1	3	0	0	0	0	0	0	3	0	999	999	1	0	9	4	0	5	999	999	999	999	999
490	19	0	1	3	0	0	0	0	3	0	0	0	0	3	0	0	999	999	1	0	10	4	6	0	999	999	999	999	999
491	18	0	1	0	0	1	0	2	2	0	0	0	1	3	0	0	999	999	1	0	10	6	2	2	999	999	999	999	999
492	18	0	1	1	0	0	0	2	3	0	0	0	0	3	0	0	999	999	1	0	10	4	4	2	999	999	999	999	999
493	27	0	1	0	0	0	1	0	1	0	1	3	1	1	1	0	999	999	1	0	10	5	4	1	999	999	999	999	999
494	20	0	1	0	0	1	1	0	2	0	0	0	1	3	1	0	999	999	1	0	10	7	2	1	999	999	999	999	999
495	18	0	1	0	0	1	1	0	2	0	0	3	0	0	2	0	999	999	1	0	10	4	5	1	999	999	999	999	999
496	18	0	1	0	0	0	1	0	3	0	0	0	0	3	1	1	999	999	1	0	10	6	3	1	999	999	999	999	999
497	19	0	1	0	0	1	1	0	3	0	0	0	1	3	0	0	999	999	1	0	10	6	3	1	999	999	999	999	999
498	19	0	1	2	0	1	0	0	2	0	0	0	0	0	3	2	999	999	1	0	11	7	4	0	999	999	999	999	999
499	18	0	1	3	1	0	0	0	3	0	0	0	0	2	1	0	999	999	1	0	11	4	6	1	999	999	999	999	999
500	18	0	1	1	0	0	0	3	3	0	0	0	1	1	0	1	999	999	1	0	11	4	4	3	999	999	999	999	999
501	20	0	1	0	0	1	1	0	3	1	0	0	1	0	3	0	999	999	1	0	11	6	3	2	999	999	999	999	999
502	19	0	1	0	0	0	1	1	0	0	1	2	1	3	1	0	999	999	1	0	11	7	2	2	999	999	999	999	999
503	21	0	1	0	0	0	1	1	2	1	0	0	1	3	0	1	999	999	1	0	11	6	2	3	999	999	999	999	999
504	18	0	1	0	0	0	1	1	3	0	1	0	1	0	0	3	999	999	1	0	11	6	3	2	999	999	999	999	999
505	18	0	1	0	0	1	1	2	2	0	0	3	0	0	1	0	999	999	1	0	11	3	5	3	999	999	999	999	999
506	18	0	1	1	0	0	0	0	2	2	0	0	0	0	3	3	999	999	1	0	12	7	3	2	999	999	999	999	999
507	18	0	1	1	3	0	0	0	3	0	0	3	1	0	0	0	999	999	1	0	12	2	7	3	999	999	999	999	999
508	18	0	1	0	1	1	0	0	3	1	0	0	1	3	1	0	999	999	1	0	12	7	3	2	999	999	999	999	999
509	20	0	1	0	3	0	0	1	2	0	0	0	0	3	0	2	999	999	1	0	12	6	2	4	999	999	999	999	999
510	17	0	1	1	0	0	0	2	2	0	0	1	0	3	1	1	999	999	1	0	12	6	4	2	999	999	999	999	999
511	20	0	1	1	1	1	1	0	2	0	0	0	1	0	1	3	999	999	1	0	12	7	3	2	999	999	999	999	999
512	17	0	1	0	1	0	1	0	3	0	0	0	0	3	0	3	999	999	1	0	12	7	3	2	999	999	999	999	999
513	18	0	1	0	0	0	1	0	3	0	0	3	1	2	1	0	999	999	1	0	12	5	6	1	999	999	999	999	999
514	19	0	1	0	0	0	1	3	3	0	1	1	0	2	0	0	999	999	1	0	12	4	4	4	999	999	999	999	999
515	18	0	1	0	0	1	0	0	3	1	0	3	0	0	1	3	999	999	1	0	13	6	6	1	999	999	999	999	999
516	18	0	1	0	2	0	0	0	3	1	1	2	0	3	0	0	999	999	1	0	13	5	5	3	999	999	999	999	999
517	18	0	1	2	0	0	0	1	2	0	0	1	0	1	2	3	999	999	1	0	13	7	5	1	999	999	999	999	999
518	18	0	1	3	0	2	1	0	0	0	1	1	3	1	0	0	999	999	1	0	13	8	4	1	999	999	999	999	999
519	18	0	1	3	0	1	1	0	0	0	1	3	0	0	3	0	999	999	1	0	13	6	6	1	999	999	999	999	999
520	18	0	1	3	1	1	1	0	1	0	1	0	1	3	0	0	999	999	1	0	13	7	4	2	999	999	999	999	999
521	21	0	1	2	0	1	1	0	2	0	1	0	1	2	1	1	999	999	1	0	13	8	4	1	999	999	999	999	999
522	18	0	1	0	0	0	1	1	2	0	0	0	0	2	3	3	999	999	1	0	13	9	2	2	999	999	999	999	999
523	18	0	1	0	0	0	1	2	2	0	0	0	1	0	3	3	999	999	1	0	13	8	2	3	999	999	999	999	999
524	18	0	1	0	0	2	3	1	2	0	0	0	1	2	1	0	999	999	1	0	13	7	2	4	999	999	999	999	999
525	18	0	1	0	2	1	1	0	0	0	0	3	0	2	1	3	999	999	1	0	14	8	3	3	999	999	999	999	999
526	18	0	1	0	0	2	2	3	3	0	0	1	0	0	0	2	999	999	1	0	14	5	4	5	999	999	999	999	999
527	21	0	1	0	0	0	3	0	1	0	0	1	1	2	3	2	999	999	1	0	14	9	2	3	999	999	999	999	999
528	18	0	1	1	1	2	1	0	3	0	1	1	1	1	0	2	999	999	1	0	15	8	5	2	999	999	999	999	999
529	20	0	1	2	1	0	1	1	3	0	1	0	1	3	0	1	999	999	1	0	15	7	5	3	999	999	999	999	999
530	18	0	1	0	0	2	3	0	2	0	0	0	0	1	3	3	999	999	1	0	15	10	2	3	999	999	999	999	999
531	19	0	1	0	0	1	3	0	2	2	0	2	0	0	1	3	999	999	1	0	15	6	4	5	999	999	999	999	999
532	20	0	1	0	0	3	0	0	2	0	2	3	1	1	3	0	999	999	1	0	16	11	5	0	999	999	999	999	999
533	30	0	1	0	1	0	1	0	2	0	0	3	0	3	3	2	999	999	1	0	16	9	5	2	999	999	999	999	999
534	18	0	1	0	0	0	1	0	3	1	1	2	0	3	1	3	999	999	1	0	16	9	5	2	999	999	999	999	999
535	18	0	1	0	0	3	3	0	2	1	1	0	1	3	1	0	999	999	1	0	16	10	2	4	999	999	999	999	999
536	26	0	1	2	0	0	3	2	2	2	0	2	0	2	0	0	999	999	1	0	16	3	6	7	999	999	999	999	999
537	18	0	1	3	2	2	0	0	2	2	0	0	0	3	0	2	999	999	1	0	17	8	5	4	999	999	999	999	999
538	20	0	1	0	1	2	0	1	1	2	1	2	1	2	2	1	999	999	1	0	17	10	3	4	999	999	999	999	999
539	36	0	1	1	1	1	1	1	2	1	1	2	1	1	1	2	999	999	1	0	17	8	5	4	999	999	999	999	999
540	18	0	1	0	1	1	1	1	3	0	1	3	1	3	0	1	999	999	1	0	17	8	6	3	999	999	999	999	999
541	19	0	1	2	1	1	1	1	3	1	0	3	0	0	0	3	999	999	1	0	17	5	8	4	999	999	999	999	999
542	18	0	1	0	0	1	2	0	2	0	0	1	3	2	3	2	999	999	1	0	17	12	3	2	999	999	999	999	999
543	20	0	1	0	3	1	2	0	2	2	1	0	1	1	2	1	999	999	1	0	17	8	2	7	999	999	999	999	999
544	18	0	1	3	1	0	3	0	3	1	1	0	0	2	2	0	999	999	1	0	17	6	6	5	999	999	999	999	999
545	22	0	1	3	0	0	3	1	2	2	0	0	0	2	0	3	999	999	1	0	17	6	5	6	999	999	999	999	999
546	18	0	1	2	0	0	0	0	2	0	3	2	1	2	2	3	999	999	1	0	18	12	6	0	999	999	999	999	999
547	18	0	1	0	0	0	1	2	2	0	1	3	1	3	1	3	999	999	1	0	18	10	5	3	999	999	999	999	999
548	20	0	1	0	2	2	2	0	3	0	0	2	0	1	2	3	999	999	1	0	18	9	5	4	999	999	999	999	999
549	18	0	1	3	0	1	3	0	0	0	0	0	1	3	3	3	999	999	1	0	18	12	3	3	999	999	999	999	999
550	23	0	1	0	3	3	3	0	3	1	0	0	0	0	2	2	999	999	1	0	18	8	3	7	999	999	999	999	999
551	18	0	1	1	1	0	1	0	3	1	1	0	1	3	3	3	999	999	1	0	19	12	4	3	999	999	999	999	999
552	20	0	1	1	2	2	1	1	2	0	0	3	2	1	2	1	999	999	1	0	19	9	6	4	999	999	999	999	999
553	18	0	1	0	0	1	1	2	3	1	0	3	1	3	1	2	999	999	1	0	19	9	6	4	999	999	999	999	999
554	18	0	1	0	3	1	3	1	3	3	0	0	0	2	1	1	999	999	1	0	19	6	3	10	999	999	999	999	999
555	18	0	1	3	0	3	1	0	3	1	1	0	1	3	3	0	999	999	1	0	20	12	6	2	999	999	999	999	999
556	19	0	1	2	3	0	1	3	2	3	2	2	1	0	0	0	999	999	1	0	20	4	6	10	999	999	999	999	999
557	20	0	1	3	0	0	1	3	3	2	0	0	1	2	1	3	999	999	1	0	20	8	6	6	999	999	999	999	999
558	19	0	1	0	1	0	3	2	2	3	0	0	1	2	3	2	999	999	1	0	20	9	2	9	999	999	999	999	999
559	43	0	1	3	2	1	1	1	2	1	0	3	1	2	1	2	999	999	1	0	21	8	8	5	999	999	999	999	999
560	19	0	1	1	0	2	1	2	3	2	0	2	1	3	3	0	999	999	1	0	21	10	6	5	999	999	999	999	999
561	20	0	1	2	2	2	2	0	3	0	1	0	0	3	2	3	999	999	1	0	21	12	5	4	999	999	999	999	999
562	18	0	1	0	0	1	2	2	2	0	2	0	3	3	3	2	999	999	1	0	21	15	2	4	999	999	999	999	999
563	21	0	1	0	3	1	3	3	3	3	0	0	0	0	1	3	999	999	1	0	21	6	3	12	999	999	999	999	999
564	19	0	1	0	2	0	1	3	3	3	0	3	0	3	0	3	999	999	1	0	22	7	6	9	999	999	999	999	999
565	18	0	1	1	0	3	2	1	2	2	3	0	1	2	2	3	999	999	1	0	23	15	3	5	999	999	999	999	999
566	20	0	1	2	2	2	3	1	2	2	1	2	1	1	1	2	999	999	1	0	23	9	6	8	999	999	999	999	999
567	18	0	1	0	1	1	3	1	2	1	3	3	1	3	3	1	999	999	1	0	24	13	5	6	999	999	999	999	999
568	20	0	1	3	2	3	2	2	3	2	2	3	0	0	0	2	999	999	1	0	25	8	9	8	999	999	999	999	999
569	18	0	1	0	3	0	3	0	3	0	3	3	3	0	3	3	999	999	1	0	25	13	6	6	999	999	999	999	999
570	19	0	1	0	1	2	3	0	3	2	1	3	1	3	3	3	999	999	1	0	26	14	6	6	999	999	999	999	999
571	20	0	1	0	3	1	3	0	3	3	3	0	0	3	3	3	999	999	1	0	26	14	3	9	999	999	999	999	999
572	17	0	1	3	1	2	3	1	2	1	0	3	1	3	3	3	999	999	1	0	27	13	8	6	999	999	999	999	999
573	25	0	1	1	2	1	1	1	3	3	3	2	2	2	3	3	999	999	1	0	28	15	6	7	999	999	999	999	999
574	18	0	1	3	2	3	3	1	2	1	2	2	1	2	3	2	999	999	1	0	28	14	7	7	999	999	999	999	999
575	20	0	1	0	3	3	2	2	2	3	2	1	3	3	2	2	999	999	1	0	29	16	3	10	999	999	999	999	999
576	20	0	1	0	3	3	2	2	2	3	2	1	3	3	2	2	999	999	1	0	29	16	3	10	999	999	999	999	999
577	17	0	1	0	3	3	3	3	3	3	3	0	3	0	3	1	999	999	1	0	29	14	3	12	999	999	999	999	999
578	19	0	1	3	3	3	3	3	3	3	3	3	1	3	3	3	999	999	1	0	38	17	9	12	999	999	999	999	999
579	21	0	1	3	3	1	1	1	2	1	1	3	1	1	1	3	999	999	1	0	23	9	8	6	999	999	999	999	999
580	23	0	1	3	3	1	1	1	2	1	1	3	1	1	1	3	999	999	1	0	23	9	8	6	999	999	999	999	999
581	22	999	2	0	3	2	3	1	2	3	2	2	2	3	2	2	999	999	1	0	29	15	4	10	999	999	999	999	999
582	18	1	2	0	0	0	0	0	0	0	0	0	0	0	0	0	999	999	1	0	2	2	0	0	999	999	999	999	999
583	20	1	2	0	0	0	0	0	3	0	0	0	0	2	0	0	999	999	1	0	7	4	3	0	999	999	999	999	999
584	22	1	2	0	0	0	1	0	3	0	0	0	0	2	0	0	999	999	1	0	8	4	3	1	999	999	999	999	999
585	26	1	2	1	0	0	0	3	3	0	0	0	0	0	0	0	999	999	1	0	9	2	4	3	999	999	999	999	999
586	17	1	2	2	0	1	0	0	2	0	1	0	0	3	1	0	999	999	1	0	12	8	4	0	999	999	999	999	999
587	19	1	2	3	0	1	0	2	0	0	0	0	0	1	1	2	999	999	1	0	12	7	3	2	999	999	999	999	999
588	18	1	2	0	0	1	1	0	1	0	1	1	1	1	3	1	999	999	1	0	13	10	2	1	999	999	999	999	999
589	17	1	2	1	0	3	1	0	2	1	1	0	0	1	1	0	999	999	1	0	13	8	3	2	999	999	999	999	999
590	20	1	2	0	1	1	1	3	1	1	0	0	1	2	0	0	999	999	1	0	13	6	1	6	999	999	999	999	999
591	18	1	2	0	0	0	1	0	3	0	1	1	0	3	0	3	999	999	1	0	14	9	4	1	999	999	999	999	999
592	18	1	2	0	1	0	1	1	3	0	0	0	1	3	0	3	999	999	1	0	15	9	3	3	999	999	999	999	999
593	23	1	2	3	0	1	0	0	3	0	1	0	1	3	2	0	999	999	1	0	16	10	6	0	999	999	999	999	999
594	18	1	2	0	2	1	1	0	1	0	1	3	2	1	1	1	999	999	1	0	16	9	4	3	999	999	999	999	999
595	18	1	2	1	0	1	0	3	2	1	1	2	0	2	1	1	999	999	1	0	17	8	5	4	999	999	999	999	999
596	23	1	2	3	0	0	1	0	2	0	1	0	1	3	1	3	999	999	1	0	17	11	5	1	999	999	999	999	999
597	18	1	2	0	0	1	2	2	2	1	0	0	1	3	2	1	999	999	1	0	17	10	2	5	999	999	999	999	999
598	20	1	2	0	1	1	1	2	0	1	0	2	1	2	2	3	999	999	1	0	18	11	2	5	999	999	999	999	999
599	20	1	2	3	1	3	0	0	2	0	1	2	0	2	0	3	999	999	1	0	19	11	7	1	999	999	999	999	999
600	18	1	2	1	2	2	1	0	3	1	0	0	1	1	2	3	999	999	1	0	19	11	4	4	999	999	999	999	999
601	20	1	2	2	0	2	2	3	2	0	0	2	2	0	2	0	999	999	1	0	19	8	6	5	999	999	999	999	999
602	18	1	2	3	1	2	3	2	2	2	1	1	0	0	0	0	999	999	1	0	19	5	6	8	999	999	999	999	999
603	22	1	2	3	0	3	3	1	0	0	3	0	0	2	3	0	999	999	1	0	20	13	3	4	999	999	999	999	999
604	19	1	2	3	3	2	2	0	1	0	1	0	0	3	1	3	999	999	1	0	21	12	4	5	999	999	999	999	999
605	26	1	2	0	0	1	2	3	3	3	1	0	0	3	3	0	999	999	1	0	21	10	3	8	999	999	999	999	999
606	20	1	2	3	2	1	1	0	3	2	2	0	3	0	1	3	999	999	1	0	23	12	6	5	999	999	999	999	999
607	21	1	2	2	3	1	1	2	3	1	1	1	2	2	3	3	999	999	1	0	27	14	6	7	999	999	999	999	999
608	20	1	2	2	3	2	3	3	3	3	2	1	2	1	3	3	999	999	1	0	33	15	6	12	999	999	999	999	999
609	17	0	2	0	0	0	0	0	0	0	0	0	0	0	0	3	999	999	1	0	5	5	0	0	999	999	999	999	999
610	18	0	2	0	0	0	0	0	0	0	0	3	0	0	3	0	999	999	1	0	8	5	3	0	999	999	999	999	999
611	18	0	2	2	0	0	0	0	2	0	0	2	0	0	0	0	999	999	1	0	8	2	6	0	999	999	999	999	999
612	26	0	2	0	0	0	0	0	3	0	0	0	0	0	1	2	999	999	1	0	8	5	3	0	999	999	999	999	999
613	18	0	2	2	0	2	0	1	0	0	0	3	0	2	0	0	999	999	1	0	12	6	5	1	999	999	999	999	999
614	20	0	2	0	0	0	3	0	0	0	0	3	0	3	0	1	999	999	1	0	12	6	3	3	999	999	999	999	999
615	17	0	2	1	0	2	2	1	2	2	0	0	1	1	0	1	999	999	1	0	15	7	3	5	999	999	999	999	999
616	25	0	2	0	0	2	2	2	2	2	2	0	1	0	0	0	999	999	1	0	15	7	2	6	999	999	999	999	999
617	18	0	2	0	0	3	0	0	2	0	0	1	3	0	2	3	999	999	1	0	16	13	3	0	999	999	999	999	999
618	18	0	2	0	1	3	1	0	0	0	0	3	0	2	2	2	999	999	1	0	16	11	3	2	999	999	999	999	999
619	18	0	2	2	0	0	2	1	1	1	0	2	1	2	1	1	999	999	1	0	16	7	5	4	999	999	999	999	999
620	18	0	2	0	0	0	0	2	3	0	0	3	0	3	2	2	999	999	1	0	17	9	6	2	999	999	999	999	999
621	18	0	2	2	2	1	0	0	3	0	1	3	1	2	1	0	999	999	1	0	18	8	8	2	999	999	999	999	999
622	19	0	2	3	0	0	0	2	2	1	0	2	1	0	3	2	999	999	1	0	18	8	7	3	999	999	999	999	999
623	33	0	2	1	0	3	2	2	0	3	1	3	1	0	0	1	999	999	1	0	19	8	4	7	999	999	999	999	999
624	20	0	2	1	2	3	2	0	2	2	0	1	0	0	3	2	999	999	1	0	20	10	4	6	999	999	999	999	999
625	19	0	2	0	2	2	3	3	0	2	2	2	0	0	0	2	999	999	1	0	20	8	2	10	999	999	999	999	999
626	18	0	2	0	3	0	1	0	3	1	0	3	1	2	3	3	999	999	1	0	22	11	6	5	999	999	999	999	999
627	18	0	2	0	1	1	1	0	3	1	3	3	1	0	3	3	999	999	1	0	22	13	6	3	999	999	999	999	999
628	17	0	2	3	0	3	3	0	2	0	0	3	1	1	2	2	999	999	1	0	22	11	8	3	999	999	999	999	999
629	20	0	2	1	1	2	3	0	2	1	3	2	0	2	0	3	999	999	1	0	22	12	5	5	999	999	999	999	999
630	20	0	2	3	1	3	3	0	3	2	0	2	3	0	0	0	999	999	1	0	22	8	8	6	999	999	999	999	999
631	19	0	2	0	1	3	3	2	1	1	2	1	3	0	3	0	999	999	1	0	22	13	2	7	999	999	999	999	999
632	18	0	2	3	0	1	3	0	2	0	1	1	1	3	3	3	999	999	1	0	23	14	6	3	999	999	999	999	999
633	18	0	2	3	0	3	3	1	3	0	0	1	0	1	3	3	999	999	1	0	23	12	7	4	999	999	999	999	999
634	19	0	2	0	1	1	2	1	3	2	2	2	2	2	3	1	999	999	1	0	24	13	5	6	999	999	999	999	999
635	20	0	2	0	3	3	3	0	3	3	2	3	0	1	0	1	999	999	1	0	24	9	6	9	999	999	999	999	999
636	22	0	2	3	1	1	2	0	1	2	3	2	1	2	3	2	999	999	1	0	25	14	6	5	999	999	999	999	999
637	20	0	2	1	1	3	3	0	3	3	1	2	1	2	3	0	999	999	1	0	25	12	6	7	999	999	999	999	999
638	17	0	2	3	1	3	3	1	1	3	0	2	1	3	0	2	999	999	1	0	25	11	6	8	999	999	999	999	999
639	19	0	2	3	3	3	3	1	2	3	2	0	0	0	1	2	999	999	1	0	25	10	5	10	999	999	999	999	999
640	27	0	2	3	1	1	1	2	2	1	2	2	3	2	2	2	999	999	1	0	26	14	7	5	999	999	999	999	999
641	20	0	2	2	3	2	2	0	2	2	0	3	2	2	2	2	999	999	1	0	26	12	7	7	999	999	999	999	999
642	17	0	2	3	1	3	2	1	3	0	1	3	0	1	3	3	999	999	1	0	26	13	9	4	999	999	999	999	999
643	18	0	2	3	1	3	3	0	3	3	1	2	0	1	1	3	999	999	1	0	26	11	8	7	999	999	999	999	999
644	18	0	2	3	3	1	2	3	2	3	3	2	1	0	2	1	999	999	1	0	28	10	7	11	999	999	999	999	999
645	18	0	2	3	1	2	3	0	2	1	0	3	2	3	3	3	999	999	1	0	28	15	8	5	999	999	999	999	999
646	19	0	2	3	2	0	2	3	3	0	3	3	2	2	3	3	999	999	1	0	31	15	9	7	999	999	999	999	999
647	20	0	2	3	3	2	3	0	3	2	2	3	3	2	2	3	999	999	1	0	33	16	9	8	999	999	999	999	999
648	18	999	2	0	0	2	0	2	3	1	0	2	3	0	3	0	999	999	1	0	18	10	5	3	999	999	999	999	999
649	22	1	3	0	0	0	0	0	0	0	0	0	0	0	0	0	999	999	1	0	3	3	0	0	999	999	999	999	999
650	19	1	3	0	3	0	0	0	0	0	0	0	0	0	0	0	999	999	1	0	6	3	0	3	999	999	999	999	999
651	20	1	3	0	0	0	0	3	0	0	0	0	0	0	0	0	999	999	1	0	6	3	0	3	999	999	999	999	999
652	18	1	3	3	0	0	0	2	1	0	0	0	0	0	0	0	999	999	1	0	9	3	4	2	999	999	999	999	999
653	53	1	3	0	0	0	0	3	3	0	0	0	0	0	0	0	999	999	1	0	9	3	3	3	999	999	999	999	999
654	19	1	3	0	0	1	1	0	0	0	0	0	3	1	1	0	999	999	1	0	10	9	0	1	999	999	999	999	999
655	17	1	3	0	0	2	0	0	0	0	0	0	2	0	2	2	999	999	1	0	11	11	0	0	999	999	999	999	999
656	18	1	3	0	0	0	0	0	1	0	1	0	1	3	3	0	999	999	1	0	12	11	1	0	999	999	999	999	999
657	19	1	3	1	0	0	0	0	2	0	0	3	0	0	0	3	999	999	1	0	12	6	6	0	999	999	999	999	999
658	18	1	3	0	0	2	3	0	0	0	1	0	0	0	3	0	999	999	1	0	12	9	0	3	999	999	999	999	999
659	23	1	3	2	0	0	0	0	0	2	0	3	0	2	0	2	999	999	1	0	14	7	5	2	999	999	999	999	999
660	19	1	3	0	0	0	0	3	0	1	2	0	2	1	1	2	999	999	1	0	15	11	0	4	999	999	999	999	999
661	21	1	3	3	0	0	1	0	3	0	0	0	3	3	0	0	999	999	1	0	16	9	6	1	999	999	999	999	999
662	18	1	3	0	1	2	2	1	2	1	0	0	0	2	0	2	999	999	1	0	16	9	2	5	999	999	999	999	999
663	23	1	3	1	1	0	1	2	1	0	1	1	2	2	1	1	999	999	1	0	17	10	3	4	999	999	999	999	999
664	20	1	3	0	0	3	3	1	2	0	0	0	3	2	0	0	999	999	1	0	17	11	2	4	999	999	999	999	999
665	23	1	3	0	0	1	3	3	3	0	0	0	1	3	0	0	999	999	1	0	17	8	3	6	999	999	999	999	999
666	21	1	3	0	0	0	0	0	3	0	3	0	3	0	3	3	999	999	1	0	18	15	3	0	999	999	999	999	999
667	21	1	3	0	1	0	0	0	3	1	1	0	3	3	3	1	999	999	1	0	19	14	3	2	999	999	999	999	999
668	20	1	3	3	0	1	1	0	2	2	0	2	1	0	2	2	999	999	1	0	19	9	7	3	999	999	999	999	999
669	20	1	3	0	0	3	2	0	0	1	0	0	3	3	1	3	999	999	1	0	19	16	0	3	999	999	999	999	999
670	19	1	3	1	1	2	2	0	1	1	3	1	0	1	1	2	999	999	1	0	19	12	3	4	999	999	999	999	999
671	22	1	3	3	0	1	2	1	2	2	0	0	3	0	0	2	999	999	1	0	19	9	5	5	999	999	999	999	999
672	27	1	3	1	3	3	2	0	0	0	0	0	2	3	1	3	999	999	1	0	21	15	1	5	999	999	999	999	999
673	18	1	3	3	0	3	3	0	3	0	0	0	0	3	0	3	999	999	1	0	21	12	6	3	999	999	999	999	999
674	18	1	3	2	3	1	0	2	1	1	2	2	2	1	2	0	999	999	1	0	22	11	5	6	999	999	999	999	999
675	23	1	3	0	1	3	3	0	0	2	0	0	3	3	2	2	999	999	1	0	22	16	0	6	999	999	999	999	999
676	20	1	3	3	1	0	1	0	3	0	3	3	0	2	3	1	999	999	1	0	23	12	9	2	999	999	999	999	999
677	21	1	3	2	1	2	3	1	1	2	2	1	2	2	1	2	999	999	1	0	25	14	4	7	999	999	999	999	999
678	19	1	3	0	1	3	3	3	3	3	0	0	0	0	3	3	999	999	1	0	25	12	3	10	999	999	999	999	999
679	39	1	3	3	1	1	1	0	2	0	3	3	3	2	2	2	999	999	1	0	26	16	8	2	999	999	999	999	999
680	19	1	3	2	3	3	1	0	3	0	3	2	3	0	2	1	999	999	1	0	26	15	7	4	999	999	999	999	999
681	18	1	3	2	3	1	2	2	3	1	1	1	2	0	2	3	999	999	1	0	26	12	6	8	999	999	999	999	999
682	21	1	3	0	3	3	3	1	3	3	0	0	3	0	3	1	999	999	1	0	26	13	3	10	999	999	999	999	999
683	18	1	3	2	3	1	3	2	3	1	0	3	1	2	1	2	999	999	1	0	27	10	8	9	999	999	999	999	999
684	23	1	3	0	0	2	3	3	2	0	0	3	3	2	3	3	999	999	1	0	27	16	5	6	999	999	999	999	999
685	19	1	3	0	0	3	1	3	3	2	0	3	3	2	3	2	999	999	1	0	28	16	6	6	999	999	999	999	999
686	18	1	3	3	3	3	3	1	1	0	0	3	3	0	3	3	999	999	1	0	29	15	7	7	999	999	999	999	999
687	18	1	3	2	1	3	2	3	3	2	0	0	3	2	3	3	999	999	1	0	30	17	5	8	999	999	999	999	999
688	22	1	3	2	2	1	1	1	2	2	3	3	2	3	3	3	999	999	1	0	31	18	7	6	999	999	999	999	999
689	20	1	3	1	2	3	3	1	2	3	3	3	3	2	3	2	999	999	1	0	34	19	6	9	999	999	999	999	999
690	19	1	3	3	3	3	3	0	3	3	3	2	3	2	3	2	999	999	1	0	36	19	8	9	999	999	999	999	999
691	18	1	3	0	0	1	0	2	0	0	0	0	0	0	0	1	999	999	1	0	7	5	0	2	999	999	999	999	999
692	18	1	3	0	1	1	3	3	3	1	1	2	1	0	1	2	999	999	1	0	22	9	5	8	999	999	999	999	999
693	18	1	3	0	2	2	2	2	3	2	2	1	1	2	1	3	999	999	1	0	26	14	4	8	999	999	999	999	999
694	22	0	3	0	0	0	0	0	0	0	0	0	0	0	0	0	999	999	1	0	3	3	0	0	999	999	999	999	999
695	18	0	3	0	0	0	0	0	1	2	0	0	0	0	0	0	999	999	1	0	6	3	1	2	999	999	999	999	999
696	20	0	3	3	1	0	0	0	0	0	0	0	0	0	0	0	999	999	1	0	7	3	3	1	999	999	999	999	999
697	18	0	3	0	0	0	0	0	0	2	0	0	0	3	0	1	999	999	1	0	9	7	0	2	999	999	999	999	999
698	21	0	3	0	0	0	0	0	3	0	0	0	0	0	3	0	999	999	1	0	9	6	3	0	999	999	999	999	999
699	19	0	3	0	0	0	0	0	3	0	0	0	0	0	3	0	999	999	1	0	9	6	3	0	999	999	999	999	999
700	29	0	3	3	0	0	0	0	3	0	0	0	0	0	0	0	999	999	1	0	9	3	6	0	999	999	999	999	999
701	17	0	3	0	0	1	0	3	0	0	0	0	1	1	0	0	999	999	1	0	9	6	0	3	999	999	999	999	999
702	20	0	3	3	0	0	0	0	3	0	0	0	0	0	1	0	999	999	1	0	10	4	6	0	999	999	999	999	999
703	18	0	3	0	0	2	1	0	0	0	0	3	0	1	0	0	999	999	1	0	10	6	3	1	999	999	999	999	999
704	17	0	3	0	0	3	3	0	0	0	0	0	0	0	1	0	999	999	1	0	10	7	0	3	999	999	999	999	999
705	19	0	3	3	2	0	0	0	0	0	0	3	0	0	0	0	999	999	1	0	11	3	6	2	999	999	999	999	999
706	27	0	3	0	0	0	0	0	2	0	3	0	0	0	0	3	999	999	1	0	11	9	2	0	999	999	999	999	999
707	17	0	3	0	1	0	3	0	3	0	0	0	1	0	0	0	999	999	1	0	11	4	3	4	999	999	999	999	999
708	18	0	3	0	1	0	1	0	3	0	1	1	0	0	1	1	999	999	1	0	12	6	4	2	999	999	999	999	999
709	18	0	3	0	0	0	2	0	2	0	0	0	3	0	2	0	999	999	1	0	12	8	2	2	999	999	999	999	999
710	17	0	3	3	1	0	0	0	0	0	0	0	0	3	0	3	999	999	1	0	13	9	3	1	999	999	999	999	999
711	19	0	3	2	2	0	0	2	2	2	0	0	0	0	0	0	999	999	1	0	13	3	4	6	999	999	999	999	999
712	18	0	3	1	0	0	1	0	3	1	0	0	1	0	1	2	999	999	1	0	13	7	4	2	999	999	999	999	999
713	18	0	3	0	0	3	3	0	0	0	3	0	0	0	1	0	999	999	1	0	13	10	0	3	999	999	999	999	999
714	21	0	3	0	0	1	3	1	1	1	0	1	0	1	1	0	999	999	1	0	13	6	2	5	999	999	999	999	999
715	17	0	3	0	1	1	1	1	3	0	2	2	0	0	0	0	999	999	1	0	14	6	5	3	999	999	999	999	999
716	18	0	3	0	1	1	1	2	1	1	1	0	3	0	0	0	999	999	1	0	14	8	1	5	999	999	999	999	999
717	17	0	3	3	0	0	0	0	2	0	0	2	0	2	0	3	999	999	1	0	15	8	7	0	999	999	999	999	999
718	20	0	3	0	1	1	1	1	2	0	1	1	1	1	1	1	999	999	1	0	15	9	3	3	999	999	999	999	999
719	18	0	3	0	1	2	3	1	2	0	0	0	0	0	3	0	999	999	1	0	15	8	2	5	999	999	999	999	999
720	20	0	3	0	3	2	0	0	3	0	0	0	3	0	2	0	999	999	1	0	16	10	3	3	999	999	999	999	999
721	23	0	3	0	1	0	1	0	3	0	0	0	3	1	1	3	999	999	1	0	16	11	3	2	999	999	999	999	999
722	18	0	3	3	0	1	1	0	3	1	1	0	1	0	2	0	999	999	1	0	16	8	6	2	999	999	999	999	999
723	20	0	3	0	0	0	2	0	0	2	0	0	0	3	3	3	999	999	1	0	16	12	0	4	999	999	999	999	999
724	18	0	3	0	1	2	2	0	2	0	0	2	0	2	1	1	999	999	1	0	16	9	4	3	999	999	999	999	999
725	18	0	3	3	0	0	3	2	2	2	0	0	0	0	1	0	999	999	1	0	16	4	5	7	999	999	999	999	999
726	38	0	3	2	0	3	0	1	2	0	0	0	2	2	0	2	999	999	1	0	17	12	4	1	999	999	999	999	999
727	18	0	3	0	0	3	1	0	3	0	0	2	0	2	0	3	999	999	1	0	17	11	5	1	999	999	999	999	999
728	32	0	3	0	1	1	1	1	3	0	1	0	0	3	3	0	999	999	1	0	17	11	3	3	999	999	999	999	999
729	25	0	3	0	1	0	3	0	0	0	0	3	3	0	3	1	999	999	1	0	17	10	3	4	999	999	999	999	999
730	18	0	3	0	0	0	3	0	3	3	0	0	0	0	3	2	999	999	1	0	17	8	3	6	999	999	999	999	999
731	19	0	3	0	2	0	3	1	3	0	0	0	0	1	2	2	999	999	1	0	17	8	3	6	999	999	999	999	999
732	18	0	3	3	0	0	0	0	3	0	0	3	0	3	3	0	999	999	1	0	18	9	9	0	999	999	999	999	999
733	19	0	3	0	0	2	0	0	3	0	0	3	3	1	3	0	999	999	1	0	18	12	6	0	999	999	999	999	999
734	19	0	3	2	1	3	1	0	3	1	0	0	0	1	3	0	999	999	1	0	18	10	5	3	999	999	999	999	999
735	23	0	3	0	1	0	1	1	0	2	0	0	3	2	3	2	999	999	1	0	18	13	0	5	999	999	999	999	999
736	18	0	3	3	0	0	3	0	0	3	3	0	0	0	3	0	999	999	1	0	18	9	3	6	999	999	999	999	999
737	18	0	3	3	0	3	0	0	0	0	0	2	2	3	2	1	999	999	1	0	19	14	5	0	999	999	999	999	999
738	17	0	3	3	0	3	1	0	0	0	0	0	3	3	3	0	999	999	1	0	19	15	3	1	999	999	999	999	999
739	19	0	3	0	3	3	2	0	0	0	0	0	0	2	3	3	999	999	1	0	19	14	0	5	999	999	999	999	999
740	18	0	3	3	1	1	3	0	3	1	1	0	0	3	0	0	999	999	1	0	19	8	6	5	999	999	999	999	999
741	19	0	3	3	0	2	0	0	3	0	0	3	0	2	1	3	999	999	1	0	20	11	9	0	999	999	999	999	999
742	23	0	3	2	2	1	1	0	3	0	0	3	1	0	1	3	999	999	1	0	20	9	8	3	999	999	999	999	999
743	18	0	3	0	1	3	2	0	2	2	3	0	3	0	1	0	999	999	1	0	20	13	2	5	999	999	999	999	999
744	20	0	3	2	1	2	2	2	2	0	0	0	1	3	1	1	999	999	1	0	20	11	4	5	999	999	999	999	999
745	18	0	3	0	3	2	3	0	2	0	0	0	0	3	1	3	999	999	1	0	20	12	2	6	999	999	999	999	999
746	20	0	3	0	0	3	3	0	2	1	0	0	3	2	3	0	999	999	1	0	20	14	2	4	999	999	999	999	999
747	48	0	3	0	0	3	3	1	0	2	0	2	3	0	3	0	999	999	1	0	20	12	2	6	999	999	999	999	999
748	33	0	3	0	1	3	3	1	0	3	0	0	0	3	3	0	999	999	1	0	20	12	0	8	999	999	999	999	999
749	20	0	3	3	0	3	3	3	0	1	0	0	0	3	1	0	999	999	1	0	20	10	3	7	999	999	999	999	999
750	18	0	3	3	0	1	1	0	2	1	3	0	3	0	3	1	999	999	1	0	21	14	5	2	999	999	999	999	999
751	20	0	3	3	3	3	3	0	3	1	0	2	0	0	0	0	999	999	1	0	21	6	8	7	999	999	999	999	999
752	23	0	3	2	1	2	1	2	2	1	2	1	2	1	1	1	999	999	1	0	22	12	5	5	999	999	999	999	999
753	22	0	3	0	0	2	1	3	0	0	3	3	3	2	1	1	999	999	1	0	22	15	3	4	999	999	999	999	999
754	21	0	3	2	2	2	2	2	2	1	0	0	2	1	2	1	999	999	1	0	22	11	4	7	999	999	999	999	999
755	17	0	3	1	3	2	0	0	2	1	2	3	1	2	3	0	999	999	1	0	23	13	6	4	999	999	999	999	999
756	18	0	3	0	1	3	0	0	3	0	3	3	0	1	3	3	999	999	1	0	23	16	6	1	999	999	999	999	999
757	24	0	3	2	1	2	1	2	2	1	2	0	2	3	0	2	999	999	1	0	23	14	4	5	999	999	999	999	999
758	21	0	3	1	0	1	1	2	2	3	3	3	2	1	0	1	999	999	1	0	23	11	6	6	999	999	999	999	999
759	21	0	3	0	2	2	2	2	2	2	0	2	0	0	3	3	999	999	1	0	23	11	4	8	999	999	999	999	999
760	19	0	3	0	0	3	3	0	3	2	3	3	0	0	0	3	999	999	1	0	23	12	6	5	999	999	999	999	999
761	18	0	3	2	3	3	3	1	3	1	0	0	0	2	2	0	999	999	1	0	23	10	5	8	999	999	999	999	999
762	21	0	3	0	1	3	3	3	3	1	3	3	0	0	0	0	999	999	1	0	23	9	6	8	999	999	999	999	999
763	20	0	3	2	3	3	3	3	3	3	0	0	0	0	0	0	999	999	1	0	23	6	5	12	999	999	999	999	999
764	20	0	3	3	2	2	1	1	2	1	2	2	1	3	0	1	999	999	1	0	24	12	7	5	999	999	999	999	999
765	17	0	3	3	3	0	1	3	3	3	0	0	0	3	2	0	999	999	1	0	24	8	6	10	999	999	999	999	999
766	20	0	3	2	3	3	2	2	0	2	1	0	2	3	1	0	999	999	1	0	24	13	2	9	999	999	999	999	999
767	18	0	3	3	1	0	2	2	2	2	0	2	0	3	1	3	999	999	1	0	24	10	7	7	999	999	999	999	999
768	18	0	3	3	0	0	3	0	3	0	0	0	3	3	3	3	999	999	1	0	24	15	6	3	999	999	999	999	999
769	18	0	3	3	0	3	3	0	3	0	0	3	0	0	3	3	999	999	1	0	24	12	9	3	999	999	999	999	999
770	18	0	3	1	2	0	3	2	2	1	3	2	0	2	1	2	999	999	1	0	24	11	5	8	999	999	999	999	999
771	18	0	3	0	0	3	3	3	2	3	1	0	3	0	0	3	999	999	1	0	24	13	2	9	999	999	999	999	999
772	25	0	3	2	0	1	1	3	2	2	1	3	0	2	3	2	999	999	1	0	25	12	7	6	999	999	999	999	999
773	25	0	3	2	2	1	2	0	2	2	1	3	3	2	1	1	999	999	1	0	25	12	7	6	999	999	999	999	999
774	18	0	3	0	3	3	3	0	3	1	1	0	2	1	2	3	999	999	1	0	25	15	3	7	999	999	999	999	999
775	18	0	3	3	0	3	3	1	0	1	2	3	1	2	1	2	999	999	1	0	25	14	6	5	999	999	999	999	999
776	18	0	3	3	2	3	0	0	3	0	0	0	3	3	3	3	999	999	1	0	26	18	6	2	999	999	999	999	999
777	18	0	3	2	1	3	2	0	2	3	1	2	0	2	3	2	999	999	1	0	26	14	6	6	999	999	999	999	999
778	18	0	3	0	3	3	3	0	2	0	3	3	3	0	3	0	999	999	1	0	26	15	5	6	999	999	999	999	999
779	19	0	3	3	1	3	0	0	2	0	2	2	3	3	3	2	999	999	1	0	27	19	7	1	999	999	999	999	999
780	17	0	3	0	0	1	3	2	3	1	0	3	3	2	3	3	999	999	1	0	27	15	6	6	999	999	999	999	999
781	20	0	3	2	1	3	1	3	2	3	1	0	2	3	3	1	999	999	1	0	28	16	4	8	999	999	999	999	999
782	19	0	3	2	3	2	2	2	2	3	2	3	0	3	1	0	999	999	1	0	28	11	7	10	999	999	999	999	999
783	19	0	3	3	3	2	2	1	3	1	1	3	1	3	3	0	999	999	1	0	29	13	9	7	999	999	999	999	999
784	19	0	3	0	3	3	2	2	3	1	3	1	3	0	2	3	999	999	1	0	29	17	4	8	999	999	999	999	999
785	20	0	3	3	2	1	3	0	1	1	3	3	2	2	3	2	999	999	1	0	29	16	7	6	999	999	999	999	999
786	19	0	3	2	3	3	0	3	0	3	2	2	3	0	3	3	999	999	1	0	30	17	4	9	999	999	999	999	999
787	21	0	3	2	2	2	3	1	2	3	2	2	2	3	2	2	999	999	1	0	31	16	6	9	999	999	999	999	999
788	18	0	3	3	3	3	3	0	3	3	3	2	3	3	0	3	999	999	1	0	35	18	8	9	999	999	999	999	999
789	20	0	3	0	3	3	3	1	2	3	3	3	3	2	3	3	999	999	1	0	35	20	5	10	999	999	999	999	999
790	19	0	3	3	3	2	2	3	2	3	3	3	3	0	3	3	999	999	1	0	36	17	8	11	999	999	999	999	999
791	18	0	3	3	3	3	3	0	3	3	3	3	3	3	3	0	999	999	1	0	36	18	9	9	999	999	999	999	999
792	19	0	3	0	0	2	3	3	0	3	0	0	0	1	0	1	999	999	1	0	16	7	0	9	999	999	999	999	999
793	18	0	3	0	0	1	3	0	3	1	0	0	0	3	3	1	999	999	1	0	18	11	3	4	999	999	999	999	999
794	18	0	3	2	0	2	3	0	3	0	1	3	0	2	1	0	999	999	1	0	20	9	8	3	999	999	999	999	999
795	36	1	0	0	2	0	3	3	0	1	1	0	0	0	0	1	1	999	2	1	11	2	0	9	999	999	999	999	999
796	18	1	0	0	3	3	3	0	3	3	3	0	0	0	3	3	1	999	2	1	24	12	3	9	999	999	999	999	999
797	31	1	0	0	0	2	3	1	3	3	3	0	0	3	3	3	1	999	2	1	24	14	3	7	999	999	999	999	999
798	40	2	1	3	0	1	3	3	3	3	0	3	1	1	1	3	1	999	2	1	26	8	9	9	999	999	999	999	999
799	29	2	1	3	3	3	1	1	3	1	0	3	1	3	3	3	1	999	2	1	29	14	9	6	999	999	999	999	999
800	43	1	1	3	0	1	1	1	0	2	0	0	0	0	0	0	1	999	2	1	9	2	3	4	999	999	999	999	999
801	20	1	1	0	0	3	3	3	0	3	0	3	0	0	1	0	1	999	2	1	17	5	3	9	999	999	999	999	999
802	42	0	1	0	1	1	1	1	3	1	0	0	1	3	1	0	1	999	2	1	14	7	3	4	999	999	999	999	999
803	27	0	1	1	3	0	3	3	3	3	2	0	0	1	1	2	1	999	2	1	23	7	4	12	999	999	999	999	999
804	29	0	2	3	3	3	3	1	2	2	0	0	3	3	3	3	1	999	2	1	31	17	5	9	999	999	999	999	999
805	17	2	3	2	1	3	3	3	2	1	3	1	1	3	0	2	1	999	2	1	28	15	5	8	999	999	999	999	999
806	29	2	3	3	3	2	2	2	2	0	2	3	1	3	3	2	1	999	2	1	31	16	8	7	999	999	999	999	999
807	30	2	3	3	3	3	3	1	3	3	1	3	3	3	1	1	1	999	2	1	34	15	9	10	999	999	999	999	999
808	44	1	3	0	1	3	3	3	0	3	3	0	3	0	1	0	1	999	2	1	23	13	0	10	999	999	999	999	999
809	12	1	3	3	2	2	2	0	0	0	2	3	2	3	2	3	1	999	2	1	27	17	6	4	999	999	999	999	999
810	25	1	3	3	3	3	3	1	3	3	3	3	3	3	3	3	1	999	2	1	40	21	9	10	999	999	999	999	999
811	31	0	3	3	1	1	3	1	2	1	0	3	1	3	0	3	1	999	2	1	25	11	8	6	999	999	999	999	999
812	38	0	3	3	0	3	3	1	3	2	0	3	3	0	3	3	1	999	2	1	30	15	9	6	999	999	999	999	999
813	39	0	3	3	3	3	3	3	1	3	3	3	3	0	0	0	1	999	2	1	31	12	7	12	999	999	999	999	999
814	39	0	3	3	3	3	3	1	3	1	3	0	3	3	1	3	1	999	2	1	33	19	6	8	999	999	999	999	999
815	43	0	3	3	3	3	3	1	3	3	3	0	3	3	3	3	1	999	2	1	37	21	6	10	999	999	999	999	999
816	25	0	3	3	3	3	3	1	3	3	3	3	3	2	3	3	1	999	2	1	39	20	9	10	999	999	999	999	999
817	46	0	3	3	3	3	3	3	3	3	3	3	1	3	3	3	1	999	2	1	40	19	9	12	999	999	999	999	999
818	33	0	3	3	3	3	3	3	3	3	3	3	1	3	3	3	1	999	2	1	40	19	9	12	999	999	999	999	999
819	32	0	3	3	3	3	3	3	3	3	3	3	3	3	3	2	1	999	2	1	41	20	9	12	999	999	999	999	999
820	32	2	0	0	1	3	1	0	3	1	0	3	3	2	0	2	0	999	2	0	19	10	6	3	999	999	999	999	999
821	22	2	0	3	3	3	2	0	3	0	0	0	0	3	3	3	0	999	2	0	23	12	6	5	999	999	999	999	999
822	47	1	0	0	0	0	0	0	0	0	0	0	0	0	0	0	0	999	2	0	0	0	0	0	999	999	999	999	999
823	48	1	0	0	0	0	0	0	0	0	0	0	0	0	0	2	0	999	2	0	2	2	0	0	999	999	999	999	999
824	39	1	0	0	0	0	1	1	0	0	0	0	0	0	0	0	0	999	2	0	2	0	0	2	999	999	999	999	999
825	26	1	0	0	0	0	0	0	0	3	0	0	0	0	0	0	0	999	2	0	3	0	0	3	999	999	999	999	999
826	35	1	0	1	0	0	1	1	0	0	0	0	0	0	0	0	0	999	2	0	3	0	1	2	999	999	999	999	999
827	47	1	0	0	1	0	0	1	2	0	0	0	0	0	0	0	0	999	2	0	4	0	2	2	999	999	999	999	999
828	32	1	0	3	0	0	0	0	2	0	0	0	0	0	0	0	0	999	2	0	5	0	5	0	999	999	999	999	999
829	57	1	0	0	0	0	0	3	2	0	0	0	0	0	0	0	0	999	2	0	5	0	2	3	999	999	999	999	999
830	37	1	0	0	0	0	0	3	0	3	0	0	0	0	0	0	0	999	2	0	6	0	0	6	999	999	999	999	999
831	44	1	0	0	0	0	0	3	3	0	0	0	0	0	0	0	0	999	2	0	6	0	3	3	999	999	999	999	999
832	18	1	0	0	2	0	3	0	0	0	0	0	0	0	2	0	0	999	2	0	7	2	0	5	999	999	999	999	999
833	20	1	0	0	0	0	3	1	0	3	0	0	0	1	0	0	0	999	2	0	8	1	0	7	999	999	999	999	999
834	47	1	0	0	0	0	0	0	2	0	0	0	0	2	2	3	0	999	2	0	9	7	2	0	999	999	999	999	999
835	37	1	0	0	1	0	2	3	0	3	0	0	0	0	0	0	0	999	2	0	9	0	0	9	999	999	999	999	999
836	35	1	0	0	3	2	1	1	3	0	0	0	0	2	0	0	0	999	2	0	12	4	3	5	999	999	999	999	999
837	27	1	0	0	0	2	2	0	2	3	0	0	0	0	0	3	0	999	2	0	12	5	2	5	999	999	999	999	999
838	58	1	0	3	0	1	1	1	3	0	1	1	0	0	1	1	0	999	2	0	13	4	7	2	999	999	999	999	999
839	34	1	0	0	0	3	3	1	0	3	0	3	0	0	0	0	0	999	2	0	13	3	3	7	999	999	999	999	999
840	54	1	0	2	0	0	0	1	2	2	0	2	0	0	2	3	0	999	2	0	14	5	6	3	999	999	999	999	999
841	40	1	0	0	0	0	0	3	2	3	0	2	1	0	3	0	0	999	2	0	14	4	4	6	999	999	999	999	999
842	61	1	0	0	1	1	1	1	3	1	1	3	1	0	1	0	0	999	2	0	14	4	6	4	999	999	999	999	999
843	40	1	0	3	0	3	0	0	3	0	0	0	0	0	3	3	0	999	2	0	15	9	6	0	999	999	999	999	999
844	45	1	0	3	2	2	2	0	3	0	0	0	0	1	1	1	0	999	2	0	15	5	6	4	999	999	999	999	999
845	74	1	0	0	0	0	3	0	3	3	3	3	3	0	0	0	0	999	2	0	18	6	6	6	999	999	999	999	999
846	46	1	0	0	0	0	2	3	3	3	2	0	0	3	3	0	0	999	2	0	19	8	3	8	999	999	999	999	999
847	20	1	0	3	3	0	2	3	3	0	0	0	0	3	0	3	0	999	2	0	20	6	6	8	999	999	999	999	999
848	31	1	0	0	3	0	3	3	3	3	0	0	0	2	0	3	0	999	2	0	20	5	3	12	999	999	999	999	999
849	37	1	0	1	3	1	3	0	3	3	3	1	0	0	0	3	0	999	2	0	21	7	5	9	999	999	999	999	999
850	52	1	0	0	3	3	3	3	0	3	0	0	0	0	3	3	0	999	2	0	21	9	0	12	999	999	999	999	999
851	34	1	0	0	0	0	3	3	3	3	0	0	0	3	3	3	0	999	2	0	21	9	3	9	999	999	999	999	999
852	25	1	0	3	3	3	3	1	2	3	3	2	3	3	3	2	0	999	2	0	34	17	7	10	999	999	999	999	999
853	38	0	0	0	0	0	0	0	0	0	0	0	0	0	0	0	0	999	2	0	0	0	0	0	999	999	999	999	999
854	39	0	0	0	0	0	0	0	0	0	0	0	0	0	0	0	0	999	2	0	0	0	0	0	999	999	999	999	999
855	37	0	0	0	0	0	0	0	0	0	0	0	0	0	0	0	0	999	2	0	0	0	0	0	999	999	999	999	999
856	44	0	0	0	0	0	0	0	0	0	0	0	0	0	0	0	0	999	2	0	0	0	0	0	999	999	999	999	999
857	33	0	0	0	0	0	0	0	0	0	0	0	0	0	0	0	0	999	2	0	0	0	0	0	999	999	999	999	999
858	48	0	0	0	0	0	0	0	0	0	0	1	0	0	0	0	0	999	2	0	1	0	1	0	999	999	999	999	999
859	32	0	0	0	2	0	0	0	0	0	0	0	0	0	0	0	0	999	2	0	2	0	0	2	999	999	999	999	999
860	30	0	0	0	0	0	0	0	2	0	0	0	0	0	0	0	0	999	2	0	2	0	2	0	999	999	999	999	999
861	30	0	0	0	1	0	1	0	0	0	0	0	0	0	0	0	0	999	2	0	2	0	0	2	999	999	999	999	999
862	47	0	0	0	0	0	1	0	0	0	0	0	1	0	0	0	0	999	2	0	2	1	0	1	999	999	999	999	999
863	35	0	0	0	0	0	1	1	0	0	0	0	0	0	0	0	0	999	2	0	2	0	0	2	999	999	999	999	999
864	39	0	0	3	0	0	0	0	0	0	0	0	0	0	0	0	0	999	2	0	3	0	3	0	999	999	999	999	999
865	31	0	0	0	0	0	0	0	0	3	0	0	0	0	0	0	0	999	2	0	3	0	0	3	999	999	999	999	999
866	60	0	0	0	0	0	0	0	3	0	0	0	0	0	0	0	0	999	2	0	3	0	3	0	999	999	999	999	999
867	33	0	0	0	0	0	0	0	3	0	0	0	0	0	0	0	0	999	2	0	3	0	3	0	999	999	999	999	999
868	42	0	0	0	0	0	0	0	3	0	0	0	0	0	0	0	0	999	2	0	3	0	3	0	999	999	999	999	999
869	35	0	0	0	0	0	0	0	3	0	0	0	0	0	0	0	0	999	2	0	3	0	3	0	999	999	999	999	999
870	38	0	0	2	0	0	0	1	0	0	0	0	0	0	0	0	0	999	2	0	3	0	2	1	999	999	999	999	999
871	42	0	0	0	0	0	0	0	0	0	0	0	1	1	1	1	0	999	2	0	4	4	0	0	999	999	999	999	999
872	44	0	0	0	2	0	0	0	2	0	0	0	0	0	0	0	0	999	2	0	4	0	2	2	999	999	999	999	999
873	45	0	0	0	0	0	0	0	2	0	0	2	0	0	0	0	0	999	2	0	4	0	4	0	999	999	999	999	999
874	45	0	0	0	0	1	0	1	2	0	0	0	0	0	0	0	0	999	2	0	4	1	2	1	999	999	999	999	999
875	39	0	0	0	0	0	0	3	1	0	0	0	0	0	0	0	0	999	2	0	4	0	1	3	999	999	999	999	999
876	41	0	0	0	0	0	1	2	0	1	0	0	0	0	0	0	0	999	2	0	4	0	0	4	999	999	999	999	999
877	38	0	0	3	0	0	0	0	0	0	0	0	0	0	0	2	0	999	2	0	5	2	3	0	999	999	999	999	999
878	31	0	0	0	2	0	0	0	0	0	0	0	0	0	0	3	0	999	2	0	5	3	0	2	999	999	999	999	999
879	32	0	0	3	0	0	0	0	0	2	0	0	0	0	0	0	0	999	2	0	5	0	3	2	999	999	999	999	999
880	24	0	0	0	0	0	0	2	0	0	0	0	0	3	0	0	0	999	2	0	5	3	0	2	999	999	999	999	999
881	42	0	0	3	3	0	0	0	0	0	0	0	0	0	0	0	0	999	2	0	6	0	3	3	999	999	999	999	999
882	30	0	0	0	3	3	0	0	0	0	0	0	0	0	0	0	0	999	2	0	6	3	0	3	999	999	999	999	999
883	40	0	0	0	0	0	0	0	0	2	0	2	0	0	0	2	0	999	2	0	6	2	2	2	999	999	999	999	999
884	41	0	0	3	0	0	0	0	3	0	0	0	0	0	0	0	0	999	2	0	6	0	6	0	999	999	999	999	999
885	44	0	0	0	0	0	0	0	3	0	0	0	0	0	0	3	0	999	2	0	6	3	3	0	999	999	999	999	999
886	45	0	0	0	0	0	0	0	3	3	0	0	0	0	0	0	0	999	2	0	6	0	3	3	999	999	999	999	999
887	40	0	0	0	0	0	0	3	2	1	0	0	0	0	0	0	0	999	2	0	6	0	2	4	999	999	999	999	999
888	41	0	0	1	1	0	1	0	0	3	0	0	0	0	0	0	0	999	2	0	6	0	1	5	999	999	999	999	999
889	48	0	0	0	1	0	1	1	2	0	1	0	0	0	0	0	0	999	2	0	6	1	2	3	999	999	999	999	999
890	28	0	0	0	0	0	1	2	2	0	0	1	0	0	0	0	0	999	2	0	6	0	3	3	999	999	999	999	999
891	32	0	0	0	0	0	3	3	0	0	0	0	0	0	0	0	0	999	2	0	6	0	0	6	999	999	999	999	999
892	41	0	0	0	2	0	0	0	3	0	0	0	0	0	0	2	0	999	2	0	7	2	3	2	999	999	999	999	999
893	40	0	0	0	0	0	0	1	2	0	0	2	0	0	0	2	0	999	2	0	7	2	4	1	999	999	999	999	999
894	32	0	0	3	0	0	0	1	3	0	0	0	0	0	0	0	0	999	2	0	7	0	6	1	999	999	999	999	999
895	31	0	0	3	3	0	1	0	0	0	0	0	0	0	0	0	0	999	2	0	7	0	3	4	999	999	999	999	999
896	50	0	0	3	0	0	1	1	0	2	0	0	0	0	0	0	0	999	2	0	7	0	3	4	999	999	999	999	999
897	30	0	0	1	0	0	3	0	0	3	0	0	0	0	0	0	0	999	2	0	7	0	1	6	999	999	999	999	999
898	49	0	0	0	0	0	0	1	3	1	0	0	0	0	3	0	0	999	2	0	8	3	3	2	999	999	999	999	999
899	34	0	0	3	0	0	1	1	3	0	0	0	0	0	0	0	0	999	2	0	8	0	6	2	999	999	999	999	999
900	42	0	0	0	0	0	0	0	3	0	0	3	0	3	0	0	0	999	2	0	9	3	6	0	999	999	999	999	999
901	39	0	0	0	1	0	2	0	3	0	0	3	0	0	0	0	0	999	2	0	9	0	6	3	999	999	999	999	999
902	17	0	0	0	0	0	3	0	3	0	0	1	0	0	0	2	0	999	2	0	9	2	4	3	999	999	999	999	999
903	39	0	0	0	1	0	0	3	3	0	0	0	0	0	0	3	0	999	2	0	10	3	3	4	999	999	999	999	999
904	17	0	0	0	0	0	3	1	2	0	0	1	0	0	0	3	0	999	2	0	10	3	3	4	999	999	999	999	999
905	32	0	0	3	0	0	0	0	0	2	0	3	0	0	0	3	0	999	2	0	11	3	6	2	999	999	999	999	999
906	51	0	0	0	3	3	0	2	3	0	0	0	0	0	0	0	0	999	2	0	11	3	3	5	999	999	999	999	999
907	50	0	0	0	0	3	0	0	3	0	0	0	0	3	3	0	0	999	2	0	12	9	3	0	999	999	999	999	999
908	41	0	0	3	0	0	0	1	2	2	0	0	0	2	0	2	0	999	2	0	12	4	5	3	999	999	999	999	999
909	59	0	0	0	0	0	0	3	3	0	3	3	0	0	0	0	0	999	2	0	12	3	6	3	999	999	999	999	999
910	33	0	0	3	2	0	2	0	2	0	0	0	0	3	0	0	0	999	2	0	12	3	5	4	999	999	999	999	999
911	34	0	0	0	1	1	3	3	2	1	1	0	0	0	0	0	0	999	2	0	12	2	2	8	999	999	999	999	999
912	45	0	0	0	0	0	3	3	3	0	0	0	0	0	0	3	0	999	2	0	12	3	3	6	999	999	999	999	999
913	30	0	0	2	3	0	0	2	3	3	0	0	0	0	0	0	0	999	2	0	13	0	5	8	999	999	999	999	999
914	37	0	0	3	0	0	1	0	2	0	0	3	0	2	0	2	0	999	2	0	13	4	8	1	999	999	999	999	999
915	31	0	0	0	0	0	1	0	3	0	0	0	0	3	3	3	0	999	2	0	13	9	3	1	999	999	999	999	999
916	28	0	0	0	1	3	1	3	3	1	0	1	0	0	0	0	0	999	2	0	13	3	4	6	999	999	999	999	999
917	38	0	0	3	1	1	3	1	2	0	0	2	0	0	0	0	0	999	2	0	13	1	7	5	999	999	999	999	999
918	43	0	0	3	3	0	0	1	2	2	0	3	0	0	0	0	0	999	2	0	14	0	8	6	999	999	999	999	999
919	42	0	0	0	2	2	2	1	2	0	0	0	0	0	2	3	0	999	2	0	14	7	2	5	999	999	999	999	999
920	44	0	0	3	3	2	3	0	0	0	0	3	0	0	0	0	0	999	2	0	14	2	6	6	999	999	999	999	999
921	46	0	0	0	0	0	3	0	3	0	0	3	0	3	0	2	0	999	2	0	14	5	6	3	999	999	999	999	999
922	27	0	0	2	0	1	0	0	3	0	0	3	0	0	3	3	0	999	2	0	15	7	8	0	999	999	999	999	999
923	31	0	0	3	1	0	1	0	3	3	0	2	0	0	0	2	0	999	2	0	15	2	8	5	999	999	999	999	999
924	33	0	0	3	0	0	3	3	0	0	0	0	0	0	3	3	0	999	2	0	15	6	3	6	999	999	999	999	999
925	35	0	0	0	0	2	2	0	3	3	0	0	0	3	3	0	0	999	2	0	16	8	3	5	999	999	999	999	999
926	21	0	0	3	2	0	2	3	2	2	0	0	0	2	0	0	0	999	2	0	16	2	5	9	999	999	999	999	999
927	26	0	0	2	1	1	3	1	3	1	0	2	0	0	0	2	0	999	2	0	16	3	7	6	999	999	999	999	999
928	44	0	0	2	2	0	0	3	2	2	0	2	0	2	0	2	0	999	2	0	17	4	6	7	999	999	999	999	999
929	27	0	0	3	3	0	0	1	3	3	0	3	0	0	0	2	0	999	2	0	18	2	9	7	999	999	999	999	999
930	32	0	0	0	3	0	3	0	0	3	3	0	0	3	3	0	0	999	2	0	18	9	0	9	999	999	999	999	999
931	34	0	0	2	3	1	3	0	3	0	1	0	1	2	1	1	0	999	2	0	18	7	5	6	999	999	999	999	999
932	50	0	0	0	0	3	3	0	3	3	0	0	0	3	0	3	0	999	2	0	18	9	3	6	999	999	999	999	999
933	27	0	0	0	1	1	3	0	3	3	0	2	0	2	0	3	0	999	2	0	18	6	5	7	999	999	999	999	999
934	32	0	0	0	1	3	1	1	3	1	0	3	1	2	1	3	0	999	2	0	20	10	6	4	999	999	999	999	999
935	40	0	0	3	3	3	1	1	3	3	0	0	0	0	3	0	0	999	2	0	20	6	6	8	999	999	999	999	999
936	27	0	0	3	2	0	1	3	3	0	0	2	0	3	0	3	0	999	2	0	20	6	8	6	999	999	999	999	999
937	43	0	0	2	3	0	3	1	3	3	0	3	0	0	0	2	0	999	2	0	20	2	8	10	999	999	999	999	999
938	39	0	0	3	0	0	1	3	3	3	0	3	0	0	2	3	0	999	2	0	21	5	9	7	999	999	999	999	999
939	42	0	0	3	2	0	3	1	3	0	0	3	0	3	3	0	0	999	2	0	21	6	9	6	999	999	999	999	999
940	48	0	0	0	0	3	3	1	3	2	3	3	0	3	0	0	0	999	2	0	21	9	6	6	999	999	999	999	999
941	32	0	0	3	0	3	3	0	3	0	2	1	0	1	3	3	0	999	2	0	22	12	7	3	999	999	999	999	999
942	43	0	0	0	3	3	3	1	3	3	3	0	0	0	0	3	0	999	2	0	22	9	3	10	999	999	999	999	999
943	35	0	0	1	0	3	3	3	3	0	0	3	0	3	0	3	0	999	2	0	22	9	7	6	999	999	999	999	999
944	30	0	0	0	3	3	3	1	3	0	0	3	0	3	3	3	0	999	2	0	25	12	6	7	999	999	999	999	999
945	32	0	0	3	3	0	3	1	3	3	0	3	0	3	0	3	0	999	2	0	25	6	9	10	999	999	999	999	999
946	43	0	0	3	3	3	3	1	3	1	0	0	0	3	3	3	0	999	2	0	26	12	6	8	999	999	999	999	999
947	18	0	0	0	3	3	3	2	3	3	1	3	3	0	1	3	0	999	2	0	28	11	6	11	999	999	999	999	999
948	43	0	0	3	3	3	3	3	2	0	3	2	0	0	3	3	0	999	2	0	28	12	7	9	999	999	999	999	999
949	23	0	0	3	3	2	3	1	2	3	3	3	0	0	3	3	0	999	2	0	29	11	8	10	999	999	999	999	999
950	26	0	0	3	3	3	3	3	3	3	0	2	0	3	0	3	0	999	2	0	29	9	8	12	999	999	999	999	999
951	56	2	1	3	1	1	0	2	3	0	0	2	0	3	0	3	0	999	2	0	19	8	8	3	999	999	999	999	999
952	34	2	1	3	3	3	3	1	3	1	1	3	3	1	1	3	0	999	2	0	30	13	9	8	999	999	999	999	999
953	38	2	1	3	3	1	3	3	3	3	0	3	1	0	3	3	0	999	2	0	30	9	9	12	999	999	999	999	999
954	26	2	1	0	1	1	3	1	3	3	3	3	3	3	3	3	0	999	2	0	31	17	6	8	999	999	999	999	999
955	40	1	1	0	1	0	0	0	2	0	0	0	0	0	0	0	0	999	2	0	4	1	2	1	999	999	999	999	999
956	63	1	1	0	0	1	1	0	0	0	0	0	3	0	0	0	0	999	2	0	6	5	0	1	999	999	999	999	999
957	38	1	1	0	1	0	1	0	3	0	0	0	0	0	0	0	0	999	2	0	6	1	3	2	999	999	999	999	999
958	53	1	1	0	3	1	1	0	0	1	0	0	1	0	0	0	0	999	2	0	8	3	0	5	999	999	999	999	999
959	43	1	1	0	0	1	1	3	0	0	0	0	0	0	0	2	0	999	2	0	8	4	0	4	999	999	999	999	999
960	49	1	1	0	0	1	1	1	3	1	1	0	0	1	0	3	0	999	2	0	13	7	3	3	999	999	999	999	999
961	43	1	1	0	3	1	1	0	3	2	0	2	0	1	0	0	0	999	2	0	14	3	5	6	999	999	999	999	999
962	37	1	1	0	1	3	1	0	3	0	1	0	3	1	0	1	0	999	2	0	15	10	3	2	999	999	999	999	999
963	36	1	1	0	1	3	1	3	3	3	1	0	1	0	0	0	0	999	2	0	17	6	3	8	999	999	999	999	999
964	30	1	1	0	3	2	2	3	3	3	1	0	0	0	0	0	0	999	2	0	18	4	3	11	999	999	999	999	999
965	34	1	1	0	1	1	3	3	0	0	3	0	3	3	0	0	0	999	2	0	18	11	0	7	999	999	999	999	999
966	28	1	1	0	1	3	1	1	3	1	3	2	1	1	1	0	0	999	2	0	19	10	5	4	999	999	999	999	999
967	55	1	1	0	3	3	3	0	2	2	0	3	3	0	0	0	0	999	2	0	20	7	5	8	999	999	999	999	999
968	34	1	1	0	3	3	3	1	0	0	3	3	0	0	0	3	0	999	2	0	20	10	3	7	999	999	999	999	999
969	47	1	1	0	1	2	2	3	3	1	3	3	1	0	0	1	0	999	2	0	21	8	6	7	999	999	999	999	999
970	37	1	1	0	1	3	2	0	3	3	1	0	1	3	3	1	0	999	2	0	22	13	3	6	999	999	999	999	999
971	36	1	1	0	3	3	3	1	2	3	1	0	0	3	2	0	0	999	2	0	22	10	2	10	999	999	999	999	999
972	34	1	1	1	1	3	3	1	3	0	1	3	1	1	0	3	0	999	2	0	22	10	7	5	999	999	999	999	999
973	31	1	1	3	3	1	1	1	3	3	1	2	1	3	0	0	0	999	2	0	23	7	8	8	999	999	999	999	999
974	28	1	1	1	0	3	3	0	3	3	2	0	1	0	3	3	0	999	2	0	23	13	4	6	999	999	999	999	999
975	28	1	1	1	0	3	3	0	3	3	2	0	1	0	3	3	0	999	2	0	23	13	4	6	999	999	999	999	999
976	38	1	1	0	1	3	3	3	3	1	0	3	0	0	3	3	0	999	2	0	24	10	6	8	999	999	999	999	999
977	27	1	1	3	1	1	3	1	3	3	1	0	1	3	1	3	0	999	2	0	25	11	6	8	999	999	999	999	999
978	28	1	1	3	1	3	3	3	3	1	0	0	3	3	3	3	0	999	2	0	30	16	6	8	999	999	999	999	999
979	39	1	1	3	1	3	3	3	3	3	3	0	1	3	3	1	0	999	2	0	31	15	6	10	999	999	999	999	999
980	35	0	1	0	0	1	0	0	0	0	0	0	0	0	0	0	0	999	2	0	2	2	0	0	999	999	999	999	999
981	51	0	1	0	0	1	0	0	3	0	0	0	0	0	0	0	0	999	2	0	5	2	3	0	999	999	999	999	999
982	29	0	1	0	0	0	0	0	3	1	0	0	0	0	0	0	0	999	2	0	5	1	3	1	999	999	999	999	999
983	46	0	1	0	0	0	1	2	1	1	0	0	0	0	0	0	0	999	2	0	6	1	1	4	999	999	999	999	999
984	48	0	1	0	0	1	1	0	3	0	1	0	0	0	0	0	0	999	2	0	7	3	3	1	999	999	999	999	999
985	55	0	1	3	1	0	1	1	0	0	0	0	0	0	0	0	0	999	2	0	7	1	3	3	999	999	999	999	999
986	27	0	1	0	0	3	1	0	3	1	0	0	0	0	0	0	0	999	2	0	9	4	3	2	999	999	999	999	999
987	49	0	1	0	1	1	1	1	0	0	0	0	1	0	1	2	0	999	2	0	9	6	0	3	999	999	999	999	999
988	37	0	1	1	1	1	1	3	0	1	0	0	0	0	0	1	0	999	2	0	10	3	1	6	999	999	999	999	999
989	40	0	1	2	1	0	1	3	0	1	1	0	0	0	0	0	0	999	2	0	10	2	2	6	999	999	999	999	999
990	32	0	1	0	3	2	1	0	3	1	0	0	0	0	0	0	0	999	2	0	11	3	3	5	999	999	999	999	999
991	40	0	1	0	1	1	1	1	0	3	0	0	0	0	1	2	0	999	2	0	11	5	0	6	999	999	999	999	999
992	45	0	1	0	0	3	3	1	3	0	0	0	0	0	0	0	0	999	2	0	11	4	3	4	999	999	999	999	999
993	27	0	1	0	3	1	3	1	3	0	0	0	0	0	0	0	0	999	2	0	12	2	3	7	999	999	999	999	999
994	36	0	1	3	1	1	1	0	3	0	0	0	0	3	0	0	0	999	2	0	13	5	6	2	999	999	999	999	999
995	27	0	1	0	1	0	1	2	3	3	0	0	0	0	0	2	0	999	2	0	13	3	3	7	999	999	999	999	999
996	32	0	1	3	1	0	1	3	3	1	0	0	0	0	0	0	0	999	2	0	13	1	6	6	999	999	999	999	999
997	38	0	1	0	0	1	1	1	3	1	1	0	1	0	1	3	0	999	2	0	14	8	3	3	999	999	999	999	999
998	33	0	1	0	1	1	3	1	1	0	0	1	0	1	3	1	0	999	2	0	14	7	2	5	999	999	999	999	999
999	32	0	1	0	2	0	3	3	0	2	0	0	0	1	0	2	0	999	2	0	14	4	0	10	999	999	999	999	999
1000	36	0	1	2	1	1	1	1	3	1	1	0	1	0	1	2	0	999	2	0	16	7	5	4	999	999	999	999	999
1001	41	0	1	0	1	3	3	1	3	1	0	0	0	0	3	0	0	999	2	0	16	7	3	6	999	999	999	999	999
1002	35	0	1	3	3	0	3	1	3	1	0	0	1	0	0	0	0	999	2	0	16	2	6	8	999	999	999	999	999
1003	18	0	1	0	3	1	3	0	3	0	0	1	0	1	1	3	0	999	2	0	17	7	4	6	999	999	999	999	999
1004	49	0	1	0	1	0	0	2	3	1	0	3	1	3	0	3	0	999	2	0	18	8	6	4	999	999	999	999	999
1005	27	0	1	0	3	1	1	0	2	2	1	3	0	0	1	3	0	999	2	0	18	7	5	6	999	999	999	999	999
1006	34	0	1	3	1	1	1	1	3	0	0	3	0	1	3	0	0	999	2	0	18	6	9	3	999	999	999	999	999
1007	56	0	1	1	1	1	1	1	3	1	1	0	1	1	3	2	0	999	2	0	18	10	4	4	999	999	999	999	999
1008	31	0	1	0	0	2	2	1	2	2	2	0	0	2	2	2	0	999	2	0	18	11	2	5	999	999	999	999	999
1009	28	0	1	3	0	1	1	0	3	1	1	0	0	3	3	3	0	999	2	0	20	12	6	2	999	999	999	999	999
1010	44	0	1	0	0	2	3	0	3	3	3	2	3	0	0	0	0	999	2	0	20	9	5	6	999	999	999	999	999
1011	51	0	1	0	2	1	2	1	2	3	1	1	1	2	2	2	0	999	2	0	21	10	3	8	999	999	999	999	999
1012	44	0	1	3	3	2	3	0	3	0	1	0	0	0	3	3	0	999	2	0	22	10	6	6	999	999	999	999	999
1013	36	0	1	3	3	0	3	3	3	3	0	3	0	0	0	0	0	999	2	0	22	1	9	12	999	999	999	999	999
1014	36	0	1	2	3	1	1	3	3	3	0	2	1	3	0	0	0	999	2	0	23	6	7	10	999	999	999	999	999
1015	22	0	1	2	0	3	3	3	3	0	0	0	0	3	3	3	0	999	2	0	24	13	5	6	999	999	999	999	999
1016	43	0	1	2	3	3	3	0	2	3	3	0	0	1	1	3	0	999	2	0	25	12	4	9	999	999	999	999	999
1017	30	0	1	3	2	1	3	3	3	1	0	3	1	0	1	3	0	999	2	0	25	7	9	9	999	999	999	999	999
1018	34	0	1	3	2	1	2	0	3	2	2	3	2	1	1	3	0	999	2	0	26	11	9	6	999	999	999	999	999
1019	49	0	1	2	2	3	3	1	3	2	3	2	1	1	1	2	0	999	2	0	27	12	7	8	999	999	999	999	999
1020	49	0	1	3	3	1	3	3	3	1	0	2	1	3	0	3	0	999	2	0	27	9	8	10	999	999	999	999	999
1021	37	0	1	3	3	1	3	3	3	1	1	3	1	0	1	3	0	999	2	0	27	8	9	10	999	999	999	999	999
1022	29	0	1	3	3	3	3	3	1	3	1	1	1	1	3	3	0	999	2	0	30	13	5	12	999	999	999	999	999
1023	22	0	1	3	3	3	3	1	3	2	3	3	3	2	3	2	0	999	2	0	35	17	9	9	999	999	999	999	999
1024	47	0	1	3	3	3	3	3	3	3	3	3	3	3	3	3	0	999	2	0	40	19	9	12	999	999	999	999	999
1025	47	0	1	3	3	3	3	3	3	3	3	3	3	3	3	3	0	999	2	0	40	19	9	12	999	999	999	999	999
1026	45	0	1	3	3	3	3	3	3	3	3	3	3	3	3	3	0	999	2	0	40	19	9	12	999	999	999	999	999
1027	46	2	2	3	0	0	1	1	2	0	0	0	0	1	1	1	0	999	2	0	12	5	5	2	999	999	999	999	999
1028	28	1	2	3	1	3	1	0	3	1	1	0	1	3	1	3	0	999	2	0	23	14	6	3	999	999	999	999	999
1029	33	1	2	3	3	0	0	3	3	1	2	3	3	3	0	0	0	999	2	0	26	10	9	7	999	999	999	999	999
1030	65	0	2	0	0	0	0	0	0	0	0	0	0	0	0	2	0	999	2	0	4	4	0	0	999	999	999	999	999
1031	34	0	2	0	0	1	0	3	0	0	0	0	0	0	0	0	0	999	2	0	6	3	0	3	999	999	999	999	999
1032	34	0	2	2	0	0	0	0	2	0	0	2	0	1	3	0	0	999	2	0	12	6	6	0	999	999	999	999	999
1033	57	0	2	0	0	2	3	0	2	0	0	0	0	2	2	0	0	999	2	0	13	8	2	3	999	999	999	999	999
1034	59	0	2	3	0	0	0	3	3	0	0	3	1	0	0	0	0	999	2	0	15	3	9	3	999	999	999	999	999
1035	59	0	2	3	0	3	0	0	2	0	0	3	0	0	3	2	0	999	2	0	18	10	8	0	999	999	999	999	999
1036	33	0	2	0	3	3	3	3	2	3	0	0	0	0	0	0	0	999	2	0	19	5	2	12	999	999	999	999	999
1037	28	0	2	2	0	3	1	1	3	1	0	0	3	0	3	2	0	999	2	0	21	13	5	3	999	999	999	999	999
1038	58	0	2	3	3	2	1	1	3	3	0	3	2	0	0	3	0	999	2	0	26	9	9	8	999	999	999	999	999
1039	23	0	2	3	3	3	3	1	2	1	1	0	0	3	2	3	0	999	2	0	27	14	5	8	999	999	999	999	999
1040	39	0	2	2	3	3	3	1	2	2	0	2	2	0	2	3	0	999	2	0	27	12	6	9	999	999	999	999	999
1041	34	0	2	3	3	2	3	1	2	3	2	0	2	2	3	0	0	999	2	0	28	13	5	10	999	999	999	999	999
1042	21	0	2	3	3	3	3	1	3	1	3	3	0	3	0	3	0	999	2	0	31	14	9	8	999	999	999	999	999
1043	19	0	2	3	2	3	3	3	3	3	2	3	1	2	3	2	0	999	2	0	35	15	9	11	999	999	999	999	999
1044	28	0	2	3	3	3	3	3	3	3	3	3	3	0	3	3	0	999	2	0	38	17	9	12	999	999	999	999	999
1045	44	2	3	3	3	1	1	1	3	0	0	3	1	3	3	1	0	999	2	0	26	12	9	5	999	999	999	999	999
1046	25	2	3	3	3	1	1	3	3	3	1	0	1	3	1	0	0	999	2	0	26	10	6	10	999	999	999	999	999
1047	35	2	3	3	2	2	3	0	2	3	3	0	0	3	3	3	0	999	2	0	30	17	5	8	999	999	999	999	999
1048	21	2	3	3	3	3	3	1	3	3	3	3	3	0	3	2	0	999	2	0	36	17	9	10	999	999	999	999	999
1049	24	2	3	3	1	3	3	1	3	3	3	3	2	3	3	3	0	999	2	0	37	20	9	8	999	999	999	999	999
1050	32	2	3	3	3	3	3	3	3	1	3	3	3	3	1	3	0	999	2	0	38	19	9	10	999	999	999	999	999
1051	25	2	3	3	3	3	3	3	3	1	3	3	3	3	3	2	0	999	2	0	39	20	9	10	999	999	999	999	999
1052	16	2	3	3	3	3	3	3	3	3	3	3	3	3	3	3	0	999	2	0	42	21	9	12	999	999	999	999	999
1053	57	1	3	0	0	0	0	0	2	0	0	0	0	0	0	0	0	999	2	0	5	3	2	0	999	999	999	999	999
1054	33	1	3	0	0	0	0	3	0	0	0	0	0	3	0	0	0	999	2	0	9	6	0	3	999	999	999	999	999
1055	42	1	3	0	0	0	0	1	0	0	3	0	3	0	0	0	0	999	2	0	10	9	0	1	999	999	999	999	999
1056	50	1	3	0	0	0	0	3	0	0	0	0	3	0	3	0	0	999	2	0	12	9	0	3	999	999	999	999	999
1057	39	1	3	0	0	0	1	0	3	2	0	0	0	2	0	2	0	999	2	0	13	7	3	3	999	999	999	999	999
1058	43	1	3	0	1	0	3	1	0	1	1	0	3	0	0	0	0	999	2	0	13	7	0	6	999	999	999	999	999
1059	38	1	3	0	0	3	3	2	3	0	0	0	0	0	0	0	0	999	2	0	14	6	3	5	999	999	999	999	999
1060	35	1	3	0	0	3	0	0	2	0	2	0	3	3	0	0	0	999	2	0	16	14	2	0	999	999	999	999	999
1061	53	1	3	0	0	0	1	1	3	2	1	1	1	3	1	0	0	999	2	0	17	9	4	4	999	999	999	999	999
1062	39	1	3	3	3	3	0	0	3	3	0	0	0	0	0	0	0	999	2	0	18	6	6	6	999	999	999	999	999
1063	44	1	3	0	0	3	3	1	3	3	0	0	0	0	0	2	0	999	2	0	18	8	3	7	999	999	999	999	999
1064	34	1	3	0	1	3	3	3	0	1	0	0	3	3	0	0	0	999	2	0	20	12	0	8	999	999	999	999	999
1065	36	1	3	0	1	3	3	3	1	3	0	0	3	0	0	0	0	999	2	0	20	9	1	10	999	999	999	999	999
1066	33	1	3	0	1	3	3	1	2	3	0	3	0	3	0	2	0	999	2	0	24	11	5	8	999	999	999	999	999
1067	29	1	3	0	3	3	3	0	3	1	3	0	3	0	3	0	0	999	2	0	25	15	3	7	999	999	999	999	999
1068	36	1	3	0	3	3	3	1	3	0	0	3	3	0	3	0	0	999	2	0	25	12	6	7	999	999	999	999	999
1069	28	1	3	0	0	3	3	3	3	1	3	0	3	1	3	0	0	999	2	0	26	16	3	7	999	999	999	999	999
1070	37	1	3	1	3	3	1	1	3	2	3	1	3	0	1	2	0	999	2	0	27	15	5	7	999	999	999	999	999
1071	52	1	3	3	3	3	3	1	0	3	0	2	3	0	3	0	0	999	2	0	27	12	5	10	999	999	999	999	999
1072	27	1	3	0	3	3	3	3	0	3	3	0	3	0	0	3	0	999	2	0	27	15	0	12	999	999	999	999	999
1073	31	1	3	0	3	1	3	2	3	1	0	0	3	3	3	3	0	999	2	0	28	16	3	9	999	999	999	999	999
1074	44	1	3	0	1	3	3	3	3	3	3	0	0	0	3	3	0	999	2	0	28	15	3	10	999	999	999	999	999
1075	35	1	3	3	2	3	3	0	0	3	0	0	3	3	3	3	0	999	2	0	29	18	3	8	999	999	999	999	999
1076	34	1	3	3	1	3	3	1	3	3	3	0	3	3	0	0	0	999	2	0	29	15	6	8	999	999	999	999	999
1077	31	1	3	0	0	3	3	3	3	3	3	0	3	0	3	2	0	999	2	0	29	17	3	9	999	999	999	999	999
1078	35	1	3	0	3	3	3	3	3	3	3	2	3	0	0	0	0	999	2	0	29	12	5	12	999	999	999	999	999
1079	68	1	3	0	3	0	1	3	2	3	3	3	3	3	3	0	0	999	2	0	30	15	5	10	999	999	999	999	999
1080	36	1	3	3	3	2	2	3	0	3	3	0	2	3	0	3	0	999	2	0	30	16	3	11	999	999	999	999	999
1081	32	1	3	1	3	3	3	3	3	3	0	3	0	3	3	0	0	999	2	0	31	12	7	12	999	999	999	999	999
1082	62	1	3	3	1	3	3	3	3	3	1	1	3	1	1	3	0	999	2	0	32	15	7	10	999	999	999	999	999
1083	19	1	3	0	3	3	3	3	3	3	0	0	3	3	3	3	0	999	2	0	33	18	3	12	999	999	999	999	999
1084	30	1	3	3	3	3	2	2	2	2	3	0	2	3	3	3	0	999	2	0	34	20	5	9	999	999	999	999	999
1085	30	1	3	3	1	3	3	2	3	3	3	0	3	2	2	3	0	999	2	0	34	19	6	9	999	999	999	999	999
1086	52	1	3	0	3	3	3	2	0	3	3	3	3	3	3	3	0	999	2	0	35	21	3	11	999	999	999	999	999
1087	32	1	3	3	3	3	3	2	3	0	1	3	3	3	3	3	0	999	2	0	36	19	9	8	999	999	999	999	999
1088	18	1	3	3	3	2	3	2	3	3	3	3	2	2	3	1	0	999	2	0	36	16	9	11	999	999	999	999	999
1089	39	1	3	3	1	3	3	1	3	2	3	3	3	3	3	3	0	999	2	0	37	21	9	7	999	999	999	999	999
1090	30	1	3	3	3	3	3	1	3	3	0	3	3	3	3	3	0	999	2	0	37	18	9	10	999	999	999	999	999
1091	34	1	3	3	1	3	3	3	3	3	3	0	3	3	3	3	0	999	2	0	37	21	6	10	999	999	999	999	999
1092	44	1	3	3	3	3	3	3	3	3	3	3	1	1	3	3	0	999	2	0	38	17	9	12	999	999	999	999	999
1093	52	1	3	3	3	3	3	3	3	3	3	3	3	3	0	3	0	999	2	0	39	18	9	12	999	999	999	999	999
1094	43	0	3	0	0	1	1	1	0	0	0	0	0	0	0	0	0	999	2	0	6	4	0	2	999	999	999	999	999
1095	35	0	3	0	0	3	0	0	0	0	0	0	0	0	0	2	0	999	2	0	8	8	0	0	999	999	999	999	999
1096	34	0	3	0	0	0	0	0	3	2	0	0	0	0	0	0	0	999	2	0	8	3	3	2	999	999	999	999	999
1097	34	0	3	0	0	0	0	0	3	2	0	0	0	0	0	0	0	999	2	0	8	3	3	2	999	999	999	999	999
1098	43	0	3	0	0	0	0	1	3	0	0	0	0	0	0	2	0	999	2	0	9	5	3	1	999	999	999	999	999
1099	26	0	3	3	0	0	0	0	3	1	1	0	0	0	0	0	0	999	2	0	11	4	6	1	999	999	999	999	999
1100	43	0	3	3	1	1	1	1	0	0	0	0	1	0	0	0	0	999	2	0	11	5	3	3	999	999	999	999	999
1101	30	0	3	2	0	0	0	0	3	0	0	0	0	0	2	2	0	999	2	0	12	7	5	0	999	999	999	999	999
1102	44	0	3	0	0	3	3	0	0	0	0	3	0	0	0	0	0	999	2	0	12	6	3	3	999	999	999	999	999
1103	39	0	3	0	0	0	0	0	3	1	0	0	0	3	3	0	0	999	2	0	13	9	3	1	999	999	999	999	999
1104	26	0	3	0	1	0	2	1	3	2	0	0	0	0	0	2	0	999	2	0	14	5	3	6	999	999	999	999	999
1105	37	0	3	0	1	3	1	0	3	0	0	1	3	0	3	0	0	999	2	0	18	12	4	2	999	999	999	999	999
1106	31	0	3	0	1	0	3	0	2	2	0	2	3	0	3	0	0	999	2	0	19	9	4	6	999	999	999	999	999
1107	42	0	3	1	1	3	1	3	3	1	1	0	1	0	1	1	0	999	2	0	20	10	4	6	999	999	999	999	999
1108	23	0	3	0	2	2	2	3	2	0	0	0	0	2	2	2	0	999	2	0	20	11	2	7	999	999	999	999	999
1109	36	0	3	3	0	3	0	0	3	0	0	3	0	3	3	0	0	999	2	0	21	12	9	0	999	999	999	999	999
1110	52	0	3	3	3	0	3	0	3	3	0	0	0	0	0	3	0	999	2	0	21	6	6	9	999	999	999	999	999
1111	32	0	3	0	0	3	3	1	3	0	1	0	3	3	3	0	0	999	2	0	23	16	3	4	999	999	999	999	999
1112	46	0	3	0	3	3	3	3	0	1	2	0	3	0	3	0	0	999	2	0	24	14	0	10	999	999	999	999	999
1113	28	0	3	3	0	3	3	0	3	0	3	2	0	3	0	3	0	999	2	0	26	15	8	3	999	999	999	999	999
1114	31	0	3	3	1	3	3	1	0	3	0	0	3	0	3	3	0	999	2	0	26	15	3	8	999	999	999	999	999
1115	43	0	3	0	3	3	3	3	2	3	0	1	0	0	3	2	0	999	2	0	26	11	3	12	999	999	999	999	999
1116	28	0	3	2	0	3	3	1	3	0	1	3	3	0	3	2	0	999	2	0	27	15	8	4	999	999	999	999	999
1117	20	0	3	2	3	3	3	1	2	3	0	2	3	3	0	0	0	999	2	0	28	12	6	10	999	999	999	999	999
1118	33	0	3	1	1	3	3	3	3	3	1	0	3	3	1	1	0	999	2	0	29	15	4	10	999	999	999	999	999
1119	34	0	3	0	3	3	3	3	3	3	2	3	3	0	0	0	0	999	2	0	29	11	6	12	999	999	999	999	999
1120	31	0	3	3	0	3	3	0	0	3	3	0	3	3	3	3	0	999	2	0	30	21	3	6	999	999	999	999	999
1121	37	0	3	3	3	3	3	0	3	0	0	3	3	0	3	3	0	999	2	0	30	15	9	6	999	999	999	999	999
1122	49	0	3	3	3	3	3	0	3	3	0	0	3	0	3	3	0	999	2	0	30	15	6	9	999	999	999	999	999
1123	31	0	3	0	0	3	3	3	3	3	0	0	3	3	3	3	0	999	2	0	30	18	3	9	999	999	999	999	999
1124	50	0	3	0	2	1	1	3	3	3	0	3	3	3	3	3	0	999	2	0	31	16	6	9	999	999	999	999	999
1125	28	0	3	3	3	1	3	1	2	3	0	2	1	3	3	3	0	999	2	0	31	14	7	10	999	999	999	999	999
1126	47	0	3	3	1	3	3	1	3	1	1	1	3	3	3	2	0	999	2	0	31	18	7	6	999	999	999	999	999
1127	41	0	3	3	3	2	3	3	3	2	3	2	2	2	0	0	0	999	2	0	31	12	8	11	999	999	999	999	999
1128	33	0	3	3	3	3	3	0	3	1	1	2	1	3	3	3	0	999	2	0	32	17	8	7	999	999	999	999	999
1129	31	0	3	3	3	3	3	3	1	0	3	3	3	1	2	1	0	999	2	0	32	16	7	9	999	999	999	999	999
1130	36	0	3	3	3	0	0	3	3	3	3	3	0	3	3	3	0	999	2	0	33	15	9	9	999	999	999	999	999
1131	51	0	3	0	3	3	3	0	3	3	3	0	3	3	3	3	0	999	2	0	33	21	3	9	999	999	999	999	999
1132	44	0	3	3	3	1	3	3	2	2	1	3	1	3	3	2	0	999	2	0	33	14	8	11	999	999	999	999	999
1133	55	0	3	0	3	3	3	3	3	3	0	0	3	3	3	3	0	999	2	0	33	18	3	12	999	999	999	999	999
1134	31	0	3	3	3	3	3	1	3	1	1	3	3	3	3	1	0	999	2	0	34	17	9	8	999	999	999	999	999
1135	30	0	3	3	3	3	3	1	3	3	0	0	3	3	3	3	0	999	2	0	34	18	6	10	999	999	999	999	999
1136	39	0	3	3	3	3	3	1	3	3	1	2	2	2	2	3	0	999	2	0	34	16	8	10	999	999	999	999	999
1137	36	0	3	2	3	3	3	3	3	3	3	0	1	3	3	1	0	999	2	0	34	17	5	12	999	999	999	999	999
1138	35	0	3	2	3	3	3	3	3	3	3	0	3	0	3	3	0	999	2	0	35	18	5	12	999	999	999	999	999
1139	11	0	3	3	3	3	3	0	0	3	3	3	3	3	3	3	0	999	2	0	36	21	6	9	999	999	999	999	999
1140	30	0	3	3	3	3	3	0	3	0	3	3	3	3	3	3	0	999	2	0	36	21	9	6	999	999	999	999	999
1141	33	0	3	0	3	3	3	3	3	3	3	0	3	3	3	3	0	999	2	0	36	21	3	12	999	999	999	999	999
1142	45	0	3	3	3	3	3	0	3	3	1	3	3	3	3	3	0	999	2	0	37	19	9	9	999	999	999	999	999
1143	53	0	3	3	2	3	3	3	3	3	3	2	3	1	3	2	0	999	2	0	37	18	8	11	999	999	999	999	999
1144	42	0	3	3	3	3	3	1	3	1	3	3	3	3	3	3	0	999	2	0	38	21	9	8	999	999	999	999	999
1145	37	0	3	3	3	3	3	3	3	3	3	0	3	3	3	2	0	999	2	0	38	20	6	12	999	999	999	999	999
1146	27	0	3	3	3	3	3	1	3	3	3	3	3	3	3	3	0	999	2	0	40	21	9	10	999	999	999	999	999
1147	52	0	3	3	3	3	3	3	3	3	3	1	3	3	3	3	0	999	2	0	40	21	7	12	999	999	999	999	999
1148	39	0	3	3	3	3	3	3	3	3	3	3	3	3	3	3	0	999	2	0	42	21	9	12	999	999	999	999	999
1149	23	0	3	3	3	3	3	3	3	3	3	3	3	3	3	3	0	999	2	0	42	21	9	12	999	999	999	999	999
1150	27	0	3	3	3	3	3	3	3	3	3	3	3	3	3	3	0	999	2	0	42	21	9	12	999	999	999	999	999
1151	18	1	3	1	3	3	3	1	3	3	3	3	3	3	3	3	1	1	2	1	38	21	7	10	999	999	999	999	999
1152	17	1	3	3	3	3	3	1	3	3	2	2	3	3	3	3	1	999	2	1	38	20	8	10	999	999	999	999	999
1153	18	2	3	3	2	3	2	2	3	2	3	3	2	2	3	2	0	1	2	1	35	18	9	8	999	999	999	999	999
1154	33	1	3	3	2	2	3	1	2	0	3	0	3	0	3	3	1	999	2	1	28	17	5	6	999	999	999	999	999
1155	20	2	3	3	3	3	3	3	3	1	3	3	3	3	3	1	1	999	2	1	38	19	9	10	999	999	999	999	999
1156	37	1	3	3	3	3	1	1	3	3	3	1	3	1	3	3	1	999	2	1	34	19	7	8	999	999	999	999	999
1157	31	2	0	3	1	3	3	3	3	3	3	3	1	3	1	0	1	1	2	1	30	11	9	10	999	999	999	999	999
1158	40	0	3	3	1	3	3	1	3	3	1	3	3	3	3	0	1	999	2	1	33	16	9	8	999	999	999	999	999
1159	31	2	3	3	3	3	3	1	3	3	3	3	3	3	3	1	1	1	2	1	38	19	9	10	999	999	999	999	999
1160	32	2	1	0	1	3	3	1	0	1	0	0	1	3	3	0	1	999	2	1	17	11	0	6	999	999	999	999	999
1161	16	0	3	3	3	3	3	3	3	3	3	3	3	3	3	3	1	1	2	1	42	21	9	12	999	999	999	999	999
1162	29	0	1	3	1	3	3	1	3	1	1	3	3	3	1	1	1	1	2	1	28	13	9	6	999	999	999	999	999
1163	25	0	3	3	3	3	3	3	3	3	1	3	3	3	3	3	1	999	2	1	40	19	9	12	999	999	999	999	999
1164	35	0	3	3	3	3	1	1	3	1	3	3	3	3	1	1	0	1	2	1	32	17	9	6	999	999	999	999	999
1165	32	0	3	3	3	3	1	1	3	1	0	0	1	0	1	3	1	999	2	1	23	11	6	6	999	999	999	999	999
1166	31	0	0	0	3	3	1	0	3	0	2	0	0	0	2	3	1	1	2	1	17	10	3	4	999	999	999	999	999
1167	36	0	3	2	3	1	3	3	3	3	1	2	1	1	3	3	1	999	2	1	32	13	7	12	999	999	999	999	999
1168	33	0	3	3	3	3	3	3	3	1	3	3	3	3	3	3	0	999	2	0	40	21	9	10	999	999	999	999	999
1169	23	0	2	3	3	3	3	3	3	3	3	0	0	2	3	0	0	999	2	0	31	13	6	12	999	999	999	999	999
1170	33	0	0	3	3	3	3	1	3	3	0	3	0	3	0	3	0	999	2	0	28	9	9	10	999	999	999	999	999
1171	36	0	3	3	3	3	1	1	3	3	1	0	3	3	1	3	0	999	2	0	31	17	6	8	999	999	999	999	999
1172	45	0	2	3	3	3	3	1	2	1	3	0	1	3	3	3	0	999	2	0	31	18	5	8	999	999	999	999	999
1173	52	0	3	3	1	3	1	3	3	3	1	0	3	0	2	0	0	999	2	0	26	12	6	8	999	999	999	999	999
1174	22	2	3	2	3	3	3	1	3	3	1	3	3	3	3	2	0	999	2	0	36	18	8	10	999	999	999	999	999
1175	47	0	3	3	3	3	3	3	3	3	3	3	3	3	3	3	0	999	2	0	42	21	9	12	999	999	999	999	999
1176	48	0	3	3	3	3	3	3	3	3	3	3	3	3	3	3	0	999	2	0	42	21	9	12	999	999	999	999	999
1177	37	0	3	3	3	3	3	3	1	1	1	1	1	1	1	1	0	999	2	0	26	11	5	10	999	999	999	999	999
1178	41	0	1	0	1	3	3	1	3	1	1	0	1	1	3	3	0	999	2	0	22	13	3	6	999	999	999	999	999
1179	18	1	3	3	3	3	3	3	3	3	3	3	3	1	3	3	0	999	2	0	40	19	9	12	999	999	999	999	999
1180	44	0	3	0	3	3	3	3	1	1	3	0	1	0	3	3	0	999	2	0	27	16	1	10	999	999	999	999	999
1181	45	2	0	3	0	0	0	0	0	3	0	3	0	0	0	0	0	999	2	0	9	0	6	3	999	999	999	999	999
1182	43	0	1	3	3	3	3	3	3	3	3	3	3	1	3	3	0	999	2	0	38	17	9	12	999	999	999	999	999
1183	21	2	1	3	3	3	3	0	3	3	0	3	0	3	3	1	0	0	2	0	29	11	9	9	999	999	999	999	999
1184	19	2	3	3	3	3	3	3	3	3	3	2	3	3	3	3	0	999	2	0	41	21	8	12	999	999	999	999	999
1185	21	2	3	3	3	3	3	2	3	3	3	3	3	3	3	3	0	999	2	0	41	21	9	11	999	999	999	999	999
1186	26	0	3	3	3	3	1	3	3	1	3	3	3	1	3	3	0	0	2	0	36	19	9	8	999	999	999	999	999
1187	34	0	3	0	1	1	3	1	3	3	1	0	3	3	3	3	0	999	2	0	28	17	3	8	999	999	999	999	999
1188	18	2	0	0	2	3	2	2	2	2	0	0	0	0	0	2	0	999	2	0	15	5	2	8	999	999	999	999	999
1189	24	2	3	3	3	3	3	3	3	3	3	3	3	3	3	1	0	0	2	0	40	19	9	12	999	999	999	999	999
1190	27	0	3	3	3	3	3	3	3	3	2	2	3	3	2	2	0	999	2	0	38	18	8	12	999	999	999	999	999
1191	36	0	3	3	3	3	3	3	3	3	3	3	3	3	3	3	0	999	2	0	42	21	9	12	999	999	999	999	999
1192	25	2	1	3	3	2	3	3	3	1	3	3	1	3	3	3	0	0	2	0	35	16	9	10	999	999	999	999	999
1193	20	0	3	3	3	3	3	1	3	1	1	3	1	3	1	3	0	0	2	0	32	15	9	8	999	999	999	999	999
1194	20	1	3	1	3	3	3	3	3	3	3	0	3	3	0	3	0	999	2	0	34	18	4	12	999	999	999	999	999
1195	19	0	3	3	3	3	3	1	2	1	2	2	0	0	1	2	0	999	2	0	26	11	7	8	999	999	999	999	999
1196	17	0	3	3	3	3	3	0	3	1	3	3	3	3	3	1	0	999	2	0	35	19	9	7	999	999	999	999	999
1197	18	1	3	3	3	3	3	3	2	3	3	3	3	3	1	3	0	999	2	0	39	19	8	12	999	999	999	999	999
1198	34	0	3	3	3	3	1	3	3	2	3	0	3	3	3	2	0	999	2	0	35	20	6	9	999	999	999	999	999
1199	24	1	0	0	0	1	0	0	0	0	0	0	0	0	3	0	0	999	2	0	4	4	0	0	999	999	999	999	999
1200	60	0	1	3	3	3	3	1	3	1	3	3	1	0	0	3	0	999	2	0	28	11	9	8	999	999	999	999	999
1201	24	0	3	3	3	3	3	1	3	3	3	3	3	3	3	3	0	999	2	0	40	21	9	10	999	999	999	999	999
1202	27	0	1	3	1	3	3	3	3	3	3	3	1	2	2	1	0	999	2	0	32	13	9	10	999	999	999	999	999
1203	22	1	2	1	3	1	3	2	3	1	3	1	3	3	3	1	0	999	2	0	30	16	5	9	999	999	999	999	999
1204	39	2	1	3	3	3	1	1	3	3	3	3	1	0	3	3	0	999	2	0	31	14	9	8	999	999	999	999	999
1205	16	0	0	3	0	0	3	0	3	0	3	3	0	0	0	3	0	999	2	0	18	6	9	3	999	999	999	999	999
1206	32	1	3	1	3	3	3	3	0	3	3	0	3	3	3	3	0	999	2	0	34	21	1	12	999	999	999	999	999
1207	18	0	2	2	0	3	2	2	2	2	3	2	1	2	2	2	0	999	2	0	27	15	6	6	999	999	999	999	999
1208	39	0	3	3	3	3	3	2	2	0	2	2	3	3	3	3	0	999	2	0	35	20	7	8	999	999	999	999	999
1209	26	2	1	3	1	3	1	1	3	1	3	2	1	1	3	3	0	0	2	0	27	15	8	4	999	999	999	999	999
1210	18	1	1	1	0	3	3	3	3	3	0	2	0	0	0	3	0	999	2	0	22	7	6	9	999	999	999	999	999
1211	23	0	0	0	0	3	0	3	2	3	3	0	0	0	0	0	0	999	2	0	14	6	2	6	999	999	999	999	999
1212	21	0	3	0	3	1	1	1	2	3	0	0	3	3	0	0	0	999	2	0	20	10	2	8	999	999	999	999	999
1213	45	0	0	3	3	3	3	3	3	3	3	3	3	3	3	3	0	999	2	0	39	18	9	12	999	999	999	999	999
1214	49	1	1	0	1	0	1	3	0	3	0	0	0	0	1	0	0	999	2	0	10	2	0	8	999	999	999	999	999
1215	22	2	3	0	3	3	3	3	3	3	3	3	3	0	2	2	0	999	2	0	34	16	6	12	999	999	999	999	999
1216	42	0	1	0	3	1	1	0	3	0	0	0	0	0	0	0	0	999	2	0	9	2	3	4	999	999	999	999	999
1217	20	0	3	3	3	3	3	0	3	3	3	0	2	3	3	1	0	0	2	0	33	18	6	9	999	999	999	999	999
1218	21	0	3	3	2	3	3	3	3	3	3	0	3	0	3	0	0	999	2	0	32	15	6	11	999	999	999	999	999
1219	47	1	3	3	3	3	3	3	3	3	3	0	0	0	3	0	0	999	2	0	30	12	6	12	999	999	999	999	999
1220	34	0	3	1	3	3	3	1	3	3	0	1	3	3	3	1	0	999	2	0	31	16	5	10	999	999	999	999	999
1221	25	0	3	3	3	3	3	3	0	3	1	3	3	3	3	1	0	999	2	0	35	17	6	12	999	999	999	999	999
1222	19	0	3	3	3	3	3	0	3	0	3	0	3	3	3	3	0	999	2	0	33	21	6	6	999	999	999	999	999
1223	26	0	1	2	3	3	1	3	2	3	3	2	1	3	3	2	0	999	2	0	32	16	6	10	999	999	999	999	999
1224	22	0	3	0	3	3	3	0	2	0	3	2	2	0	0	0	0	0	2	0	21	11	4	6	999	999	999	999	999
1225	21	0	3	3	3	3	3	3	3	3	3	3	3	3	1	1	0	999	2	0	38	17	9	12	999	999	999	999	999
1226	42	0	3	0	0	3	0	0	2	0	0	0	3	3	0	3	0	999	2	0	17	15	2	0	999	999	999	999	999
1227	25	0	1	3	3	3	2	1	3	3	1	3	0	3	1	3	0	999	2	0	30	12	9	9	999	999	999	999	999
1228	38	0	0	0	0	0	0	0	1	0	0	2	0	0	0	0	0	999	2	0	3	0	3	0	999	999	999	999	999
1229	39	0	1	0	1	3	3	0	3	0	1	0	1	3	3	3	0	999	2	0	22	15	3	4	999	999	999	999	999
1230	34	0	3	0	0	0	0	0	0	3	0	0	0	0	0	0	0	999	2	0	6	3	0	3	999	999	999	999	999
1231	22	0	3	3	1	3	3	3	3	3	2	0	3	0	3	0	0	999	2	0	30	14	6	10	999	999	999	999	999
1232	29	2	3	3	1	3	3	3	3	3	0	3	3	3	3	3	0	999	2	0	37	18	9	10	999	999	999	999	999
1233	37	0	1	1	3	3	3	3	3	3	0	3	0	3	3	3	0	999	2	0	32	13	7	12	999	999	999	999	999
1234	18	0	2	0	0	0	3	3	3	3	3	3	0	0	2	3	0	999	2	0	25	10	6	9	999	999	999	999	999
1235	33	0	1	3	1	1	1	3	3	3	1	3	1	1	3	3	0	999	2	0	28	11	9	8	999	999	999	999	999
1236	28	2	1	3	3	3	3	1	3	3	1	3	3	0	3	0	0	999	2	0	30	11	9	10	999	999	999	999	999
1237	16	0	2	3	0	0	0	0	2	0	1	0	0	0	0	3	0	999	2	0	11	6	5	0	999	999	999	999	999
1238	40	1	1	3	0	0	0	0	3	3	0	0	0	1	0	3	0	999	2	0	14	5	6	3	999	999	999	999	999
1239	23	2	0	1	0	3	3	0	2	3	2	0	0	0	2	0	0	999	2	0	16	7	3	6	999	999	999	999	999
1240	17	0	1	1	3	3	3	3	3	3	1	0	0	0	0	2	0	999	2	0	23	7	4	12	999	999	999	999	999
1241	16	2	3	3	3	3	3	3	3	3	3	3	3	3	3	3	0	999	2	0	42	21	9	12	999	999	999	999	999
1242	21	0	3	3	2	3	3	1	1	2	3	3	1	3	1	1	0	999	2	0	30	15	7	8	999	999	999	999	999
1243	23	0	1	0	3	3	3	3	0	3	3	0	0	0	0	0	0	999	2	0	19	7	0	12	999	999	999	999	999
1244	15	1	3	3	3	3	3	0	3	3	3	3	3	3	0	3	0	999	2	0	36	18	9	9	999	999	999	999	999
1245	29	0	2	3	3	3	3	2	3	2	3	3	3	3	3	2	0	999	2	0	38	19	9	10	999	999	999	999	999
1246	25	0	3	3	3	3	3	3	2	3	3	0	2	3	3	0	0	999	2	0	34	17	5	12	999	999	999	999	999
1247	25	0	3	3	0	3	3	3	3	3	0	3	0	3	3	3	0	999	2	0	33	15	9	9	999	999	999	999	999
1248	21	2	3	3	3	1	3	1	3	3	3	3	3	3	1	3	0	999	2	0	36	17	9	10	999	999	999	999	999
1249	21	2	3	2	2	3	3	0	0	2	3	1	3	1	1	3	0	999	2	0	27	17	3	7	999	999	999	999	999
1250	33	0	1	3	3	1	1	3	3	3	0	0	1	3	0	2	0	999	2	0	24	8	6	10	999	999	999	999	999
1251	34	0	1	3	1	1	1	0	3	2	0	2	1	0	1	3	0	999	2	0	19	7	8	4	999	999	999	999	999
1252	37	0	3	3	3	3	1	3	3	3	3	3	3	3	3	2	0	999	2	0	39	20	9	10	999	999	999	999	999
1253	17	0	3	3	3	1	3	3	1	3	0	0	2	3	2	0	0	0	2	0	27	11	4	12	999	999	999	999	999
1254	40	1	3	3	3	3	3	0	3	3	3	3	3	3	3	3	0	999	2	0	39	21	9	9	999	999	999	999	999
1255	23	2	3	3	3	3	1	3	2	3	3	3	3	3	3	3	0	999	2	0	39	21	8	10	999	999	999	999	999
1256	28	0	0	3	0	1	3	1	3	3	0	3	0	0	0	3	0	999	2	0	20	4	9	7	999	999	999	999	999
1257	18	0	3	3	3	3	3	0	3	1	3	3	3	3	3	0	0	999	2	0	34	18	9	7	999	999	999	999	999
1258	32	0	0	2	2	0	2	1	2	3	0	3	0	2	2	2	0	999	2	0	21	6	7	8	999	999	999	999	999
1259	34	1	3	3	2	0	3	3	3	3	3	3	3	3	3	3	0	999	2	0	38	18	9	11	999	999	999	999	999
1260	26	0	1	3	1	3	3	1	2	1	3	3	3	3	3	3	0	0	2	0	33	19	8	6	999	999	999	999	999
1261	23	1	2	2	2	3	2	2	3	2	0	3	0	2	0	2	0	999	2	0	25	9	8	8	999	999	999	999	999
1262	22	0	3	3	3	3	3	0	3	2	3	3	3	3	1	3	0	999	2	0	36	19	9	8	999	999	999	999	999
1263	40	0	3	3	3	3	3	0	3	3	1	2	3	0	3	3	0	999	2	0	33	16	8	9	999	999	999	999	999
1264	21	0	3	3	3	3	3	3	3	3	3	3	3	3	1	3	0	999	2	0	40	19	9	12	999	999	999	999	999
1265	25	0	3	3	3	3	3	3	3	2	3	3	2	3	2	3	0	999	2	0	39	19	9	11	999	999	999	999	999
1266	23	0	3	3	0	0	1	0	3	0	0	3	0	3	0	0	0	999	2	0	16	6	9	1	999	999	999	999	999
1267	22	2	3	1	2	3	3	3	3	3	3	3	3	1	3	3	0	999	2	0	37	19	7	11	999	999	999	999	999
1268	20	2	3	3	2	3	3	2	3	0	3	2	3	3	3	3	0	999	2	0	36	21	8	7	999	999	999	999	999
1269	22	0	3	0	3	3	3	1	3	1	0	3	3	0	3	1	0	999	2	0	27	13	6	8	999	999	999	999	999
1270	19	0	1	3	3	3	3	1	3	1	3	3	1	3	1	3	0	999	2	0	32	15	9	8	999	999	999	999	999
1271	18	2	1	3	3	1	3	3	3	2	3	3	1	3	3	2	0	999	2	0	34	14	9	11	999	999	999	999	999
1272	32	0	3	3	3	3	3	1	3	3	3	3	3	0	3	3	0	999	2	0	37	18	9	10	999	999	999	999	999
1273	22	2	3	3	3	3	3	3	3	3	3	3	3	1	3	3	0	999	2	0	40	19	9	12	999	999	999	999	999
1274	23	0	0	3	3	3	3	3	3	0	2	2	0	3	3	3	0	999	2	0	31	14	8	9	999	999	999	999	999
1275	31	2	1	2	2	3	0	2	2	0	0	2	0	3	3	2	0	999	2	0	22	12	6	4	999	999	999	999	999
1276	22	0	2	0	2	2	2	1	2	2	2	2	0	0	0	3	0	999	2	0	20	9	4	7	999	999	999	999	999
1277	20	0	3	3	3	3	3	2	3	3	3	3	3	3	0	3	0	999	2	0	38	18	9	11	999	999	999	999	999
1278	45	0	3	2	3	3	3	2	3	2	0	3	1	2	3	3	0	999	2	0	33	15	8	10	999	999	999	999	999
1279	38	0	0	0	2	2	2	0	3	3	2	2	0	3	2	2	0	999	2	0	23	11	5	7	999	999	999	999	999
1280	58	0	1	3	2	3	3	1	3	1	2	0	0	3	3	3	0	999	2	0	28	15	6	7	999	999	999	999	999
1281	32	0	3	3	0	0	0	0	2	0	0	0	2	0	0	2	0	999	2	0	12	7	5	0	999	999	999	999	999
1282	42	0	3	3	1	1	1	0	3	3	3	3	1	3	3	3	0	999	2	0	31	17	9	5	999	999	999	999	999
1283	60	0	0	3	0	0	0	0	3	0	0	0	0	0	0	0	0	999	2	0	6	0	6	0	999	999	999	999	999
1284	43	0	0	0	0	3	3	0	2	1	2	0	0	0	2	2	0	999	2	0	15	9	2	4	999	999	999	999	999
1285	51	0	3	0	3	3	3	3	3	3	3	1	3	1	0	3	0	999	2	0	32	16	4	12	999	999	999	999	999
1286	37	0	3	3	3	3	3	1	3	3	3	3	3	3	3	3	0	999	2	0	40	21	9	10	999	999	999	999	999
1287	18	0	3	0	3	3	2	0	2	3	0	2	2	3	3	0	0	999	2	0	26	14	4	8	999	999	999	999	999
1288	42	0	3	3	1	1	3	1	3	1	3	3	3	0	1	1	1	1	2	1	27	12	9	6	999	999	999	999	999
1289	24	0	1	3	0	0	0	3	2	2	0	2	0	3	3	3	1	999	2	1	22	10	7	5	999	999	999	999	999
1290	33	0	3	3	3	3	3	3	3	3	3	3	3	3	3	3	1	1	2	1	42	21	9	12	999	999	999	999	999
1291	24	0	3	3	3	3	3	3	3	2	3	3	3	3	3	3	1	999	2	1	41	21	9	11	999	999	999	999	999
1292	44	0	3	3	3	3	3	1	3	1	3	0	3	3	3	3	1	1	2	1	35	21	6	8	999	999	999	999	999
1293	20	0	3	0	3	3	2	0	0	3	3	3	0	3	3	3	1	1	2	1	29	18	3	8	999	999	999	999	999
1294	36	0	3	3	3	3	3	1	3	2	3	3	3	3	3	3	0	1	2	1	39	21	9	9	999	999	999	999	999
1295	27	0	3	2	1	1	1	1	2	2	2	0	1	3	3	3	0	999	2	0	25	16	4	5	999	999	999	999	999
1296	23	0	3	3	3	3	3	1	3	2	3	0	3	3	3	3	0	999	2	0	36	21	6	9	999	999	999	999	999
1297	22	1	3	3	3	3	3	3	2	3	3	0	3	3	3	3	0	999	2	0	38	21	5	12	999	999	999	999	999
1298	33	1	3	3	0	3	2	1	3	0	3	0	3	0	3	3	0	999	2	0	27	18	6	3	999	999	999	999	999
1299	23	2	3	3	3	3	3	1	3	1	1	3	3	3	1	3	0	999	2	0	34	17	9	8	999	999	999	999	999
1300	42	0	3	0	3	3	3	3	2	3	3	0	3	3	0	3	0	999	2	0	32	18	2	12	999	999	999	999	999
1301	19	1	3	3	2	3	1	3	0	2	3	0	3	0	3	3	0	999	2	0	29	18	3	8	999	999	999	999	999
1302	22	2	3	1	3	3	3	1	3	3	1	1	3	3	3	3	0	999	2	0	34	19	5	10	999	999	999	999	999
1303	35	0	2	3	2	0	2	0	3	0	0	2	0	1	0	2	0	999	2	0	17	5	8	4	999	999	999	999	999
1304	37	0	0	0	0	0	0	0	0	0	0	0	0	0	0	0	999	999	3	0	0	0	0	0	34	95	48	49	44
1305	29	1	0	0	0	0	1	0	0	0	0	0	0	0	0	0	999	999	3	0	1	0	1	0	23	98	44	29	48
1306	25	0	0	0	0	0	0	1	0	0	0	0	0	0	0	0	999	999	3	0	1	0	1	0	33	96	47	45	36
1307	19	1	0	0	0	0	0	3	0	0	0	0	0	0	0	0	999	999	3	0	3	0	3	0	35	83	35	35	35
1308	23	1	0	0	0	0	0	3	0	0	0	0	0	0	0	0	999	999	3	0	3	0	3	0	36	85	36	36	36
1309	43	0	0	0	0	0	0	3	0	0	0	0	0	0	0	0	999	999	3	0	3	0	3	0	17	96	29	51	52
1310	26	0	0	0	0	0	0	0	3	0	0	0	0	0	0	0	999	999	3	0	3	0	0	3	35	78	49	37	37
1311	35	1	0	0	0	0	0	0	0	0	0	0	0	0	0	3	999	999	3	0	3	3	0	0	22	92	29	39	53
1312	37	1	0	0	0	0	0	3	0	0	0	0	0	0	0	0	999	999	3	0	3	0	3	0	20	85	42	32	39
1313	20	0	0	0	0	0	0	3	0	0	0	0	0	0	0	0	999	999	3	0	3	0	3	0	35	84	30	37	39
1314	16	1	0	0	0	0	0	3	0	0	0	0	0	0	0	0	999	999	3	0	3	0	3	0	31	91	34	33	33
1315	56	0	0	0	0	1	1	1	0	0	0	0	0	0	0	0	999	999	3	0	3	1	2	0	30	83	37	40	38
1316	36	0	0	0	0	0	0	0	0	0	0	0	0	0	0	3	999	999	3	0	3	3	0	0	28	95	41	43	49
1317	28	0	0	0	0	0	0	0	3	0	0	0	0	0	0	0	999	999	3	0	3	0	0	3	34	91	44	33	42
1318	17	0	0	0	0	0	0	3	0	0	0	0	0	0	0	0	999	999	3	0	3	0	3	0	32	89	43	38	38
1319	33	0	0	0	0	0	0	0	3	0	0	0	0	0	0	0	999	999	3	0	3	0	0	3	25	93	47	51	39
1320	30	0	0	3	0	0	0	0	0	0	0	0	0	0	0	1	999	999	3	0	4	1	0	3	48	93	57	36	43
1321	28	0	0	0	0	0	0	1	1	2	0	0	0	0	0	0	999	999	3	0	4	0	3	1	40	81	45	49	28
1322	39	0	0	0	1	1	1	0	0	0	1	0	0	0	0	0	999	999	3	0	4	2	2	0	28	86	43	39	36
1323	29	1	0	0	2	3	0	0	0	0	0	0	0	0	0	0	999	999	3	0	5	3	2	0	47	82	53	32	43
1324	49	0	0	0	0	0	0	1	3	1	0	0	0	0	0	0	999	999	3	0	5	0	2	3	38	87	49	46	39
1325	28	1	0	0	0	0	0	3	2	0	0	0	0	0	0	0	999	999	3	0	5	0	3	2	37	82	32	36	38
1326	22	0	0	0	0	0	0	0	3	2	0	0	0	0	0	0	999	999	3	0	5	0	2	3	33	88	44	42	43
1327	33	0	0	2	0	0	0	1	2	0	0	0	0	0	0	0	999	999	3	0	5	0	1	4	42	90	43	38	39
1328	55	0	0	3	0	0	0	2	0	0	0	0	0	0	0	0	999	999	3	0	5	0	2	3	27	88	52	49	45
1329	28	0	1	0	0	0	0	1	0	0	1	0	1	0	1	0	999	999	3	0	5	4	1	0	32	100	43	34	46
1330	40	0	0	3	0	0	0	0	2	0	0	0	0	0	0	0	999	999	3	0	5	0	0	5	26	97	47	51	40
1331	30	1	3	0	0	0	0	0	0	0	0	0	3	0	0	0	999	999	3	0	6	6	0	0	22	84	31	32	39
1332	21	0	0	0	0	0	3	0	3	0	0	0	0	0	0	0	999	999	3	0	6	0	3	3	29	89	43	46	38
1333	39	1	0	0	0	0	0	0	3	3	0	0	0	0	0	0	999	999	3	0	6	0	3	3	24	86	45	39	35
1334	47	0	0	0	0	0	0	1	3	0	0	0	0	1	1	0	999	999	3	0	6	2	1	3	29	96	40	40	39
1335	32	0	0	2	1	0	0	0	0	0	0	3	0	0	0	0	999	999	3	0	6	0	1	5	50	96	46	45	36
1336	26	1	1	0	0	0	0	0	0	2	1	0	1	0	1	0	999	999	3	0	6	4	2	0	27	79	49	41	43
1337	40	0	0	0	0	0	0	0	3	0	0	3	0	0	0	0	999	999	3	0	6	0	0	6	34	84	38	41	45
1338	24	0	0	0	0	0	3	0	0	0	3	0	0	0	0	0	999	999	3	0	6	3	3	0	53	95	53	37	28
1339	37	0	1	0	0	1	1	0	0	0	0	3	0	0	0	0	999	999	3	0	6	2	1	3	26	92	44	41	46
1340	49	0	1	3	0	0	0	0	3	0	0	0	0	0	0	0	999	999	3	0	7	1	0	6	26	90	43	42	38
1341	25	1	0	0	0	0	0	0	2	1	0	0	0	0	1	3	999	999	3	0	7	4	1	2	24	78	46	36	31
1342	32	0	0	3	0	0	0	0	3	0	0	0	0	0	1	0	999	999	3	0	7	1	0	6	34	100	48	37	43
1343	36	0	1	0	1	0	1	1	3	0	0	0	0	0	0	0	999	999	3	0	7	1	3	3	43	81	51	40	32
1344	34	0	0	2	0	1	1	1	0	2	0	0	0	0	0	0	999	999	3	0	7	1	4	2	37	85	44	42	39
1345	36	0	0	0	0	0	1	0	3	1	0	2	0	0	0	0	999	999	3	0	7	0	2	5	31	86	45	43	36
1346	59	0	0	1	0	0	0	0	3	0	0	3	0	0	0	0	999	999	3	0	7	0	0	7	32	100	52	49	49
1347	22	0	1	2	0	0	1	3	1	0	0	0	0	0	0	0	999	999	3	0	8	1	4	3	36	80	37	39	38
1348	33	0	0	0	0	0	0	3	3	0	0	0	0	0	0	2	999	999	3	0	8	2	3	3	38	79	49	42	38
1349	27	1	1	1	0	1	1	1	0	0	0	0	1	0	1	1	999	999	3	0	8	5	2	1	30	77	38	37	43
1350	24	1	0	0	0	0	3	0	0	1	0	1	0	0	0	3	999	999	3	0	8	3	4	1	44	82	42	42	24
1351	30	0	1	0	1	1	1	0	3	1	0	0	0	0	0	0	999	999	3	0	8	2	3	3	32	84	46	44	44
1352	31	0	1	3	0	1	1	0	0	0	0	0	0	0	0	2	999	999	3	0	8	4	1	3	40	99	50	43	49
1353	45	0	0	3	2	0	0	0	3	0	0	0	0	0	0	0	999	999	3	0	8	0	2	6	42	79	35	41	40
1354	30	1	0	2	0	0	0	0	0	0	0	0	0	3	0	3	999	999	3	0	8	6	0	2	42	85	33	35	31
1355	31	0	0	0	0	3	2	0	0	0	3	0	0	0	0	0	999	999	3	0	8	6	2	0	43	90	46	47	41
1356	18	0	0	3	0	2	0	0	0	0	0	0	0	1	2	0	999	999	3	0	8	5	0	3	38	95	54	35	41
1357	31	0	0	0	1	1	1	1	3	1	0	0	0	0	0	0	999	999	3	0	8	1	4	3	43	81	55	41	26
1358	51	0	0	0	0	0	0	0	3	0	0	3	0	2	0	0	999	999	3	0	8	2	0	6	27	97	53	44	43
1359	26	0	3	0	1	1	1	2	0	1	0	0	0	0	0	0	999	999	3	0	9	4	5	0	32	84	44	48	37
1360	35	1	1	0	1	1	1	1	2	0	0	0	0	0	0	2	999	999	3	0	9	4	3	2	38	81	41	36	43
1361	39	1	1	3	0	1	0	0	2	0	0	1	0	0	0	1	999	999	3	0	9	3	0	6	29	77	37	30	39
1362	31	0	0	0	1	3	2	1	0	2	0	0	0	0	0	0	999	999	3	0	9	3	6	0	43	90	45	45	37
1363	23	0	1	0	0	1	0	0	2	0	1	2	0	2	0	0	999	999	3	0	9	5	0	4	31	91	45	41	30
1364	30	0	0	3	0	0	0	3	0	0	0	0	0	0	0	3	999	999	3	0	9	3	3	3	44	88	46	35	38
1365	37	1	0	0	0	0	3	0	3	3	0	0	0	0	0	0	999	999	3	0	9	0	6	3	42	85	37	37	41
1366	32	0	1	0	0	0	2	0	2	2	0	2	0	0	0	0	999	999	3	0	9	1	4	4	40	83	31	44	26
1367	44	0	0	3	1	0	0	0	3	1	0	0	0	0	0	1	999	999	3	0	9	1	2	6	32	87	41	45	40
1368	45	0	1	0	0	0	0	0	2	1	0	0	1	0	1	3	999	999	3	0	9	6	1	2	36	89	37	40	40
1369	25	0	0	0	0	0	0	0	3	0	0	3	0	0	0	3	999	999	3	0	9	3	0	6	25	94	40	47	48
1370	32	0	0	0	1	0	0	1	0	1	0	0	0	3	0	3	999	999	3	0	9	6	3	0	30	93	50	45	27
1371	25	1	0	0	0	1	1	1	0	2	0	0	3	0	0	2	999	999	3	0	10	6	4	0	38	73	38	25	27
1372	25	0	0	0	1	0	1	1	0	1	0	3	0	3	0	0	999	999	3	0	10	3	4	3	34	85	42	37	41
1373	47	0	0	3	0	0	1	1	0	0	1	3	0	0	1	0	999	999	3	0	10	2	2	6	37	82	46	44	39
1374	28	0	1	1	1	0	0	0	3	1	0	0	0	0	0	3	999	999	3	0	10	4	2	4	32	98	49	39	47
1375	25	0	0	0	3	0	0	1	3	3	0	0	0	0	0	0	999	999	3	0	10	0	7	3	38	79	41	38	38
1376	46	0	0	0	0	0	0	1	3	0	0	3	0	0	0	3	999	999	3	0	10	3	1	6	32	91	39	40	36
1377	37	1	3	0	0	3	1	0	0	0	0	0	3	0	0	0	999	999	3	0	10	9	1	0	26	87	34	38	33
1378	26	1	0	0	0	0	0	1	3	0	0	0	0	3	0	3	999	999	3	0	10	6	1	3	32	82	35	38	38
1379	32	0	0	3	0	0	1	0	3	0	0	0	1	0	1	1	999	999	3	0	10	3	1	6	43	98	47	42	46
1380	55	1	2	3	0	1	1	0	3	0	0	0	0	0	0	0	999	999	3	0	10	3	1	6	38	88	38	32	30
1381	47	1	0	0	0	0	2	0	3	0	0	0	0	0	3	2	999	999	3	0	10	5	2	3	24	88	45	41	36
1382	32	1	3	0	0	3	0	0	0	0	0	0	1	0	0	3	999	999	3	0	10	10	0	0	19	94	35	44	48
1383	36	0	0	0	0	1	1	3	3	0	0	0	0	0	0	2	999	999	3	0	10	3	4	3	31	81	47	45	44
1384	28	0	0	0	0	0	0	0	3	1	0	3	0	0	0	3	999	999	3	0	10	3	1	6	30	95	42	42	44
1385	46	1	0	0	0	0	0	1	3	0	0	3	0	0	0	3	999	999	3	0	10	3	1	6	31	76	36	46	36
1386	28	0	1	0	0	0	0	0	2	0	2	3	0	0	0	3	999	999	3	0	11	6	0	5	28	92	32	43	41
1387	32	0	1	0	0	0	2	3	0	2	3	0	0	0	0	0	999	999	3	0	11	4	7	0	41	82	41	32	42
1388	30	1	0	0	3	3	1	1	3	0	0	0	0	0	0	0	999	999	3	0	11	3	5	3	29	84	44	35	32
1389	28	0	0	0	0	3	0	3	3	0	0	2	0	0	0	0	999	999	3	0	11	3	3	5	52	80	39	51	24
1390	18	0	2	2	0	0	0	0	0	0	0	0	2	2	1	2	999	999	3	0	11	9	0	2	41	88	40	44	38
1391	32	0	0	0	1	0	1	1	3	0	1	3	0	1	0	0	999	999	3	0	11	2	3	6	34	90	48	37	45
1392	24	0	0	3	1	0	0	0	3	1	0	3	0	0	0	0	999	999	3	0	11	0	2	9	40	74	38	44	32
1393	17	0	1	0	1	0	3	0	0	3	0	0	0	0	0	3	999	999	3	0	11	4	7	0	32	102	35	45	33
1394	33	1	0	0	1	0	1	2	3	1	0	0	0	0	0	3	999	999	3	0	11	3	5	3	34	88	42	39	43
1395	26	1	3	0	1	1	1	1	3	1	0	0	0	0	0	0	999	999	3	0	11	4	4	3	23	89	42	32	44
1396	37	0	0	3	3	0	1	1	0	0	0	0	0	0	0	3	999	999	3	0	11	3	5	3	39	89	36	43	40
1397	33	1	0	0	0	0	0	3	3	0	3	3	0	0	0	0	999	999	3	0	12	3	3	6	30	90	40	37	41
1398	36	1	3	0	0	0	0	0	3	0	0	3	0	0	0	3	999	999	3	0	12	6	0	6	32	84	39	33	42
1399	36	0	0	0	0	3	3	0	3	2	0	0	1	0	0	0	999	999	3	0	12	4	5	3	32	82	43	38	37
1400	56	0	0	2	0	2	1	0	2	0	0	0	0	2	0	3	999	999	3	0	12	7	1	4	35	85	42	40	38
1401	32	1	1	3	0	2	1	0	3	0	0	0	0	0	0	2	999	999	3	0	12	5	1	6	27	79	40	33	42
1402	50	1	3	0	0	0	1	1	0	0	0	0	1	3	1	2	999	999	3	0	12	10	2	0	29	89	37	45	45
1403	19	0	1	0	0	0	3	0	3	0	0	3	0	2	0	0	999	999	3	0	12	3	3	6	40	89	46	39	42
1404	28	1	0	0	3	3	0	0	0	0	3	0	0	0	3	0	999	999	3	0	12	9	3	0	41	97	48	41	44
1405	50	0	0	3	0	0	1	0	3	0	3	2	0	0	0	0	999	999	3	0	12	3	1	8	36	89	35	41	40
1406	44	0	0	3	0	0	0	0	3	0	0	2	0	3	0	2	999	999	3	0	13	5	0	8	43	84	42	46	31
1407	43	0	1	3	0	0	3	0	0	0	3	0	3	0	0	0	999	999	3	0	13	7	3	3	42	86	45	42	38
1408	17	0	0	3	3	0	0	0	3	0	0	3	0	1	0	0	999	999	3	0	13	1	3	9	38	89	49	39	48
1409	50	1	1	0	0	0	3	3	3	0	0	0	0	0	0	3	999	999	3	0	13	4	6	3	35	86	49	43	39
1410	26	0	0	2	3	0	0	0	3	2	0	3	0	0	0	0	999	999	3	0	13	0	5	8	31	81	40	41	28
1411	25	0	1	2	3	0	0	0	3	0	0	3	0	0	0	1	999	999	3	0	13	2	3	8	46	84	44	45	40
1412	47	2	0	2	1	0	0	0	3	0	1	0	0	2	1	3	999	999	3	0	13	7	1	5	24	85	39	41	35
1413	17	0	3	0	0	1	1	0	1	0	0	0	0	3	1	3	999	999	3	0	13	11	1	1	37	90	39	37	40
1414	22	1	1	2	0	1	1	3	2	0	0	0	0	0	3	0	999	999	3	0	13	5	4	4	35	91	40	37	37
1415	32	1	0	0	2	0	2	2	3	2	0	0	0	0	0	2	999	999	3	0	13	2	8	3	38	81	38	42	38
1416	42	1	1	3	1	1	0	1	3	0	1	2	0	0	0	0	999	999	3	0	13	3	2	8	38	98	40	41	41
1417	18	0	0	0	1	1	3	1	2	0	0	2	0	0	0	3	999	999	3	0	13	4	5	4	49	80	44	46	37
1418	27	0	1	0	1	0	3	1	3	1	0	0	0	0	2	1	999	999	3	0	13	4	6	3	49	95	48	35	37
1419	28	0	0	1	0	0	3	3	3	0	0	3	0	0	0	1	999	999	3	0	14	1	6	7	40	89	39	38	32
1420	23	0	0	3	1	0	1	1	3	1	0	1	0	1	1	1	999	999	3	0	14	3	4	7	31	85	44	38	42
1421	19	1	1	0	0	1	2	1	1	2	0	0	0	2	2	2	999	999	3	0	14	8	5	1	31	89	31	36	44
1422	40	0	0	0	1	3	1	1	3	1	0	2	0	0	0	2	999	999	3	0	14	5	4	5	44	79	41	42	31
1423	23	0	1	3	1	1	1	1	3	0	0	3	0	0	0	0	999	999	3	0	14	2	3	9	24	88	55	42	32
1424	28	1	0	3	0	3	2	0	3	3	0	0	0	0	0	0	999	999	3	0	14	3	5	6	27	80	42	40	31
1425	23	0	1	3	0	0	0	0	3	0	0	1	0	2	1	3	999	999	3	0	14	7	0	7	31	86	46	43	42
1426	53	0	0	3	0	0	1	0	2	0	0	3	3	0	0	2	999	999	3	0	14	5	1	8	35	89	42	46	42
1427	35	0	1	0	0	1	3	1	3	2	0	2	0	0	1	0	999	999	3	0	14	3	6	5	40	80	44	46	35
1428	29	0	1	3	1	1	1	1	3	1	1	0	0	0	1	0	999	999	3	0	14	4	4	6	33	89	44	39	33
1429	27	0	0	2	1	1	1	1	2	1	0	2	0	3	0	0	999	999	3	0	14	4	4	6	43	72	45	38	26
1430	18	0	0	3	0	1	1	0	3	0	0	0	0	2	2	2	999	999	3	0	14	7	1	6	38	92	43	46	34
1431	29	0	0	3	2	1	3	0	3	2	0	0	0	0	0	0	999	999	3	0	14	1	7	6	45	84	41	33	36
1432	45	0	0	3	0	0	1	0	3	0	0	3	0	1	0	3	999	999	3	0	14	4	1	9	37	90	50	43	44
1433	18	0	3	0	0	3	0	0	3	0	0	0	1	1	0	3	999	999	3	0	14	11	0	3	44	97	40	46	34
1434	41	0	1	1	2	0	1	2	3	1	1	0	0	1	0	1	999	999	3	0	14	4	6	4	47	82	43	35	36
1435	31	0	0	3	1	1	0	1	0	0	0	3	0	3	0	3	999	999	3	0	15	7	2	6	40	82	28	53	32
1436	47	0	0	0	2	3	0	1	3	1	0	2	0	3	0	0	999	999	3	0	15	6	4	5	40	82	40	42	25
1437	23	1	1	0	1	1	1	3	1	2	1	0	1	2	0	1	999	999	3	0	15	7	7	1	35	80	41	36	40
1438	20	1	1	0	1	0	1	2	3	1	0	3	1	0	1	1	999	999	3	0	15	4	5	6	35	78	39	33	39
1439	33	0	1	3	2	0	1	1	2	0	0	2	0	0	0	3	999	999	3	0	15	4	4	7	45	74	41	33	41
1440	45	0	3	0	0	3	3	0	0	0	3	0	3	0	0	0	999	999	3	0	15	12	3	0	34	91	37	42	34
1441	40	0	1	0	3	3	3	0	3	2	0	0	0	0	0	0	999	999	3	0	15	4	8	3	45	80	44	38	30
1442	41	0	3	1	0	3	3	1	0	1	0	0	0	0	0	3	999	999	3	0	15	9	5	1	30	92	43	42	40
1443	33	0	1	0	1	1	1	1	3	1	0	3	1	0	0	2	999	999	3	0	15	5	4	6	37	82	44	37	51
1444	35	0	0	0	3	3	3	0	3	3	0	0	0	0	0	0	999	999	3	0	15	3	9	3	35	82	39	40	43
1445	27	0	1	3	1	1	1	1	3	0	0	3	1	0	0	0	999	999	3	0	15	3	3	9	33	87	39	38	34
1446	32	0	1	3	1	0	1	1	2	1	1	3	1	0	0	0	999	999	3	0	15	3	4	8	35	83	46	41	31
1447	25	0	1	2	0	3	0	1	3	2	0	0	0	0	3	0	999	999	3	0	15	7	3	5	43	83	44	41	39
1448	26	1	0	0	0	0	3	3	3	0	0	0	3	0	3	0	999	999	3	0	15	6	6	3	36	85	43	40	49
1449	36	0	0	0	3	3	1	0	3	0	0	2	0	0	3	0	999	999	3	0	15	6	4	5	39	85	39	38	38
1450	23	0	0	0	0	0	3	0	3	0	0	0	2	2	2	3	999	999	3	0	15	9	3	3	28	94	38	48	44
1451	23	0	0	3	0	0	3	2	3	0	0	3	0	1	0	0	999	999	3	0	15	1	5	9	44	72	37	44	36
1452	33	1	3	0	2	0	3	0	3	1	0	0	0	0	3	0	999	999	3	0	15	6	6	3	49	85	46	42	26
1453	38	0	3	1	3	0	1	1	2	0	0	0	0	1	0	3	999	999	3	0	15	7	5	3	46	85	28	32	40
1454	44	0	0	0	3	0	0	1	0	0	0	3	0	3	3	3	999	999	3	0	16	9	4	3	27	77	31	44	45
1455	21	0	3	0	1	3	3	1	3	1	0	0	0	0	0	1	999	999	3	0	16	7	6	3	46	74	43	40	46
1456	31	0	1	0	3	1	1	1	3	0	2	3	1	0	0	0	999	999	3	0	16	5	5	6	37	79	41	31	38
1457	31	1	0	3	0	0	1	0	2	2	0	3	3	0	0	2	999	999	3	0	16	5	3	8	39	88	51	43	27
1458	24	0	0	3	0	0	3	2	2	0	0	0	0	1	3	2	999	999	3	0	16	6	5	5	44	87	25	32	41
1459	32	0	0	3	3	1	0	0	3	3	0	3	0	0	0	0	999	999	3	0	16	1	6	9	45	81	52	46	28
1460	40	1	1	0	3	1	3	1	2	2	0	0	0	0	0	3	999	999	3	0	16	5	9	2	32	86	48	40	37
1461	52	0	1	0	0	1	1	1	3	0	0	3	0	3	3	0	999	999	3	0	16	8	2	6	30	89	43	44	49
1462	23	0	3	0	1	0	1	1	3	0	0	3	0	3	1	0	999	999	3	0	16	7	3	6	39	92	45	42	38
1463	33	0	0	3	1	1	3	0	3	0	0	2	0	0	0	3	999	999	3	0	16	4	4	8	31	84	48	43	45
1464	46	0	3	3	0	0	3	0	3	0	0	3	1	0	0	0	999	999	3	0	16	4	3	9	31	92	43	42	42
1465	34	2	1	2	1	3	1	1	3	1	0	2	1	0	0	0	999	999	3	0	16	5	4	7	25	90	41	44	36
1466	18	0	1	0	2	0	1	1	3	3	0	3	0	2	0	0	999	999	3	0	16	3	7	6	44	92	47	41	31
1467	23	1	1	0	2	1	1	1	2	1	1	0	1	2	1	2	999	999	3	0	16	9	5	2	29	73	41	28	46
1468	18	0	3	0	1	3	1	0	3	1	1	0	0	0	0	3	999	999	3	0	16	10	3	3	36	84	46	27	46
1469	29	0	1	3	1	1	3	1	3	1	1	0	1	0	0	0	999	999	3	0	16	4	6	6	45	90	52	45	31
1470	26	0	0	3	1	1	1	0	3	2	0	3	0	0	0	2	999	999	3	0	16	3	4	9	44	89	41	43	47
1471	34	1	0	0	3	3	3	3	0	3	0	0	0	0	0	2	999	999	3	0	17	5	12	0	26	81	43	37	36
1472	65	0	0	3	2	3	3	0	3	3	0	0	0	0	0	0	999	999	3	0	17	3	8	6	28	92	48	39	41
1473	22	1	0	0	2	1	3	0	2	3	0	0	0	3	0	3	999	999	3	0	17	7	8	2	38	77	42	38	47
1474	57	0	3	0	0	3	0	1	2	2	0	3	3	0	0	0	999	999	3	0	17	9	3	5	37	76	44	37	39
1475	47	0	1	2	3	1	1	0	3	1	1	0	1	1	1	1	999	999	3	0	17	7	5	5	39	90	39	37	38
1476	38	2	1	3	0	1	3	1	3	1	0	3	0	0	0	1	999	999	3	0	17	3	5	9	41	85	48	45	37
1477	55	0	1	0	3	1	3	1	2	1	1	0	0	1	1	2	999	999	3	0	17	7	8	2	36	86	44	43	35
1478	33	0	1	0	3	3	0	1	3	1	1	0	0	1	3	0	999	999	3	0	17	9	5	3	34	87	46	51	43
1479	47	1	3	3	0	2	1	0	3	1	0	0	0	0	1	3	999	999	3	0	17	9	2	6	33	90	43	41	41
1480	33	1	1	0	0	1	3	3	3	3	0	0	1	0	0	2	999	999	3	0	17	5	9	3	32	82	41	37	44
1481	18	1	0	3	0	2	3	0	2	2	0	0	0	0	2	3	999	999	3	0	17	7	5	5	37	82	46	45	35
1482	30	1	1	0	1	3	3	1	3	1	0	0	3	0	1	0	999	999	3	0	17	8	6	3	26	90	48	45	43
1483	17	0	2	1	1	3	1	1	1	0	3	1	1	0	1	1	999	999	3	0	17	11	3	3	43	89	46	49	31
1484	33	0	2	3	0	2	2	0	0	0	0	0	0	3	3	2	999	999	3	0	17	12	2	3	41	97	38	47	35
1485	38	0	0	0	1	3	3	0	3	1	3	0	0	0	3	0	999	999	3	0	17	9	5	3	38	94	53	41	40
1486	38	2	0	3	0	3	3	3	3	0	0	3	0	0	0	0	999	999	3	0	18	3	6	9	38	78	45	47	45
1487	18	0	3	2	3	1	2	1	2	0	0	0	0	2	0	2	999	999	3	0	18	8	6	4	40	81	31	37	40
1488	39	0	1	0	1	0	1	1	3	1	3	3	1	0	0	3	999	999	3	0	18	8	4	6	36	75	35	48	38
1489	31	1	0	3	1	1	3	1	3	0	3	0	0	0	0	3	999	999	3	0	18	7	5	6	41	95	38	41	39
1490	36	0	0	3	0	3	1	3	3	0	0	0	0	0	2	3	999	999	3	0	18	8	4	6	36	85	42	42	44
1491	44	0	0	1	1	1	1	0	3	0	1	1	0	3	3	3	999	999	3	0	18	11	2	5	33	87	50	42	39
1492	36	0	1	0	0	1	3	1	3	3	0	0	2	2	2	0	999	999	3	0	18	8	7	3	31	92	49	40	46
1493	21	0	3	2	1	1	2	0	3	0	0	0	0	3	3	0	999	999	3	0	18	10	3	5	52	88	37	39	32
1494	38	1	0	0	3	0	0	3	3	0	0	0	0	3	3	3	999	999	3	0	18	9	6	3	32	77	43	39	35
1495	34	2	1	1	3	1	1	1	3	0	1	2	1	0	3	0	999	999	3	0	18	7	5	6	45	78	41	44	31
1496	35	0	1	3	1	0	3	1	3	1	1	3	0	0	0	1	999	999	3	0	18	3	6	9	28	85	40	41	45
1497	20	0	3	3	3	0	1	0	3	3	0	2	0	0	0	0	999	999	3	0	18	3	7	8	39	77	49	43	31
1498	38	2	1	3	1	1	3	1	0	1	1	3	1	0	1	1	999	999	3	0	18	6	6	6	28	81	41	34	36
1499	37	0	0	3	1	0	3	0	3	0	0	0	3	2	0	3	999	999	3	0	18	8	4	6	45	86	48	40	35
1500	32	0	0	3	2	3	0	0	3	0	1	3	0	2	1	0	999	999	3	0	18	7	2	9	40	82	42	34	36
1501	33	0	0	0	3	0	3	3	3	0	0	3	0	0	0	3	999	999	3	0	18	3	9	6	39	87	52	49	41
1502	42	0	1	3	1	1	3	1	3	1	0	0	1	3	0	0	999	999	3	0	18	6	6	6	50	86	47	40	34
1503	32	0	1	2	1	1	1	1	3	1	1	3	1	0	0	3	999	999	3	0	19	7	4	8	32	75	46	34	50
1504	34	0	0	3	3	1	1	1	3	1	0	2	1	3	0	0	999	999	3	0	19	5	6	8	28	73	43	41	37
1505	32	2	1	3	3	1	3	0	3	3	0	2	0	0	0	0	999	999	3	0	19	2	9	8	41	78	48	42	40
1506	18	0	0	2	3	0	0	3	3	3	0	2	0	0	0	3	999	999	3	0	19	3	9	7	34	81	43	42	54
1507	20	1	2	0	2	0	2	3	2	0	2	2	0	2	2	0	999	999	3	0	19	8	7	4	36	85	36	36	36
1508	27	1	3	0	3	1	1	1	3	2	0	1	0	2	0	2	999	999	3	0	19	8	7	4	43	78	35	39	30
1509	41	1	3	1	0	0	2	2	2	0	1	0	3	0	2	3	999	999	3	0	19	12	4	3	34	82	44	40	34
1510	29	0	0	0	3	0	3	3	3	0	0	3	0	0	1	3	999	999	3	0	19	4	9	6	37	82	44	39	39
1511	39	2	1	3	0	0	3	0	3	2	0	2	0	2	1	2	999	999	3	0	19	6	5	8	45	87	47	39	42
1512	24	0	1	0	0	3	1	0	3	1	3	0	3	2	2	0	999	999	3	0	19	14	2	3	29	90	49	36	42
1513	23	0	1	3	0	3	3	0	2	1	0	3	1	0	0	2	999	999	3	0	19	7	4	8	33	89	36	35	31
1514	28	0	1	1	1	1	3	1	3	3	0	1	1	0	1	2	999	999	3	0	19	6	8	5	36	87	49	43	32
1515	51	0	0	1	2	2	0	0	3	1	3	0	0	3	2	2	999	999	3	0	19	12	3	4	30	91	40	39	44
1516	17	0	1	0	3	1	1	3	1	3	1	0	0	3	2	0	999	999	3	0	19	8	10	1	37	80	43	33	36
1517	25	0	1	3	3	1	0	1	3	1	0	0	0	3	3	0	999	999	3	0	19	8	5	6	38	88	47	40	38
1518	29	0	1	0	1	2	2	1	3	0	0	0	2	2	2	3	999	999	3	0	19	12	4	3	45	88	39	42	45
1519	39	2	0	3	1	0	2	1	3	3	1	1	0	2	0	2	999	999	3	0	19	5	7	7	47	81	51	39	33
1520	54	0	1	2	3	1	1	1	3	1	1	2	1	0	1	1	999	999	3	0	19	6	6	7	44	74	50	38	42
1521	22	0	1	3	1	1	3	1	3	1	1	3	0	0	1	0	999	999	3	0	19	4	6	9	52	88	51	44	41
1522	55	0	3	3	0	0	3	0	0	0	0	2	0	3	3	3	999	999	3	0	20	12	3	5	50	86	43	38	51
1523	38	0	3	3	3	3	3	0	3	1	0	0	0	0	0	1	999	999	3	0	20	7	7	6	52	80	45	44	28
1524	52	1	0	0	3	3	3	3	0	3	3	2	0	0	0	0	999	999	3	0	20	6	12	2	28	77	50	46	42
1525	18	0	2	3	1	1	1	1	3	1	1	3	0	0	0	3	999	999	3	0	20	7	4	9	30	86	53	31	32
1526	16	1	0	3	2	3	3	0	3	0	0	1	0	3	0	2	999	999	3	0	20	8	5	7	42	85	47	40	32
1527	28	0	1	3	1	1	1	1	2	2	3	3	0	2	0	0	999	999	3	0	20	7	5	8	44	91	52	36	40
1528	26	0	3	3	3	1	3	2	2	3	0	0	0	0	0	0	999	999	3	0	20	4	11	5	50	79	44	38	30
1529	35	0	3	0	3	3	3	1	1	1	0	2	3	0	0	0	999	999	3	0	20	9	8	3	35	76	37	46	36
1530	32	0	0	3	1	3	1	1	3	1	1	0	0	0	3	3	999	999	3	0	20	10	4	6	41	78	37	42	28
1531	20	0	1	0	1	0	1	1	3	1	1	1	1	3	3	3	999	999	3	0	20	12	4	4	39	83	47	40	28
1532	37	1	0	3	3	2	3	0	3	3	0	0	0	0	1	2	999	999	3	0	20	5	9	6	42	80	39	37	32
1533	40	0	1	3	1	3	3	1	2	3	3	0	0	0	0	0	999	999	3	0	20	7	8	5	36	96	54	39	38
1534	25	0	1	3	0	0	3	0	1	0	3	0	3	0	3	3	999	999	3	0	20	13	3	4	44	82	45	37	35
1535	31	0	2	3	2	3	3	0	3	2	0	0	0	2	0	0	999	999	3	0	20	7	7	6	49	82	56	42	34
1536	47	0	1	3	3	1	1	1	3	1	1	1	1	0	1	3	999	999	3	0	21	8	6	7	28	80	37	36	48
1537	37	0	3	1	3	3	1	0	3	0	0	1	1	1	1	3	999	999	3	0	21	12	4	5	35	82	40	44	40
1538	21	0	0	0	3	0	3	3	3	3	0	0	3	0	0	3	999	999	3	0	21	6	12	3	44	77	38	45	28
1539	36	0	2	0	2	2	2	0	2	2	2	2	2	3	0	0	999	999	3	0	21	11	6	4	46	81	48	45	39
1540	39	0	1	0	1	1	1	2	3	3	1	3	1	2	1	1	999	999	3	0	21	8	7	6	50	91	50	38	32
1541	42	0	0	0	0	3	3	0	3	0	3	0	3	0	3	3	999	999	3	0	21	15	3	3	48	96	49	45	32
1542	35	0	0	2	1	2	3	1	3	3	3	0	3	0	0	0	999	999	3	0	21	8	8	5	44	81	45	32	38
1543	26	0	2	3	0	0	3	0	2	0	3	2	0	0	3	3	999	999	3	0	21	11	3	7	49	82	50	37	32
1544	27	0	0	0	3	0	3	1	0	3	2	3	0	3	0	3	999	999	3	0	21	8	10	3	52	71	37	44	34
1545	18	0	0	3	2	3	3	1	3	0	0	1	1	0	2	2	999	999	3	0	21	8	6	7	53	87	35	40	30
1546	49	1	0	1	0	3	2	3	2	2	0	0	0	3	3	3	999	999	3	0	22	12	7	3	30	73	30	30	29
1547	30	2	3	3	3	3	2	1	3	1	0	0	0	3	0	0	999	999	3	0	22	9	7	6	30	82	39	50	35
1548	43	1	3	0	3	3	3	0	3	1	0	0	0	0	3	3	999	999	3	0	22	12	7	3	46	78	47	44	33
1549	22	0	0	2	1	3	3	2	2	3	0	3	0	0	0	3	999	999	3	0	22	6	9	7	49	76	39	37	29
1550	39	0	1	3	3	3	3	0	2	0	0	2	0	2	0	3	999	999	3	0	22	9	6	7	46	75	39	39	31
1551	20	0	3	0	2	2	2	0	0	3	2	1	1	2	1	3	999	999	3	0	22	14	7	1	48	73	37	44	21
1552	42	1	1	3	3	3	1	1	3	1	1	2	1	2	0	0	999	999	3	0	22	8	6	8	31	85	44	37	46
1553	26	0	3	0	1	3	3	0	3	3	0	0	3	3	0	0	999	999	3	0	22	12	7	3	36	81	45	54	36
1554	17	0	3	0	3	0	0	3	3	0	3	3	3	0	0	1	999	999	3	0	22	10	6	6	48	69	35	45	30
1555	28	0	3	0	3	3	3	3	2	3	0	0	1	0	0	1	999	999	3	0	22	8	12	2	41	74	42	42	38
1556	39	1	2	0	0	0	1	1	3	2	2	3	2	2	2	2	999	999	3	0	22	12	4	6	33	85	40	38	31
1557	24	0	1	3	1	1	1	1	3	3	1	0	1	2	1	3	999	999	3	0	22	10	6	6	40	82	41	50	37
1558	39	0	2	2	3	1	1	1	3	3	0	2	1	0	1	2	999	999	3	0	22	7	8	7	46	77	47	34	33
1559	38	0	0	3	3	3	3	1	3	3	0	2	0	0	1	0	999	999	3	0	22	4	10	8	45	78	33	34	31
1560	36	0	0	3	3	0	3	3	3	1	0	3	0	3	0	0	999	999	3	0	22	3	10	9	35	84	41	37	35
1561	31	0	2	0	2	3	1	2	2	3	3	0	2	1	1	0	999	999	3	0	22	12	8	2	53	84	44	38	38
1562	27	1	3	3	1	3	3	0	3	3	0	0	0	0	0	3	999	999	3	0	22	9	7	6	42	80	40	46	32
1563	21	0	3	0	1	2	3	3	3	0	0	1	3	0	3	1	999	999	3	0	23	12	7	4	37	81	43	39	35
1564	26	0	3	0	2	3	2	1	3	2	2	0	3	2	0	0	999	999	3	0	23	13	7	3	44	80	39	40	25
1565	33	0	1	3	3	3	3	1	0	3	0	3	0	0	3	0	999	999	3	0	23	7	10	6	51	82	51	39	40
1566	39	1	2	2	3	1	2	2	2	0	0	2	1	2	2	2	999	999	3	0	23	10	7	6	40	77	33	31	35
1567	28	0	3	3	3	3	3	3	2	0	0	2	0	0	1	0	999	999	3	0	23	7	9	7	51	76	47	30	43
1568	33	0	0	3	3	1	1	1	3	3	0	3	0	2	0	3	999	999	3	0	23	6	8	9	44	80	40	38	36
1569	36	0	3	0	0	3	3	3	3	3	0	0	2	0	3	0	999	999	3	0	23	11	9	3	30	89	51	41	45
1570	31	0	1	1	3	3	3	1	3	0	3	3	1	0	1	0	999	999	3	0	23	9	7	7	38	90	48	37	42
1571	21	0	1	3	0	2	2	0	3	0	2	2	2	2	2	2	999	999	3	0	23	13	2	8	40	98	44	36	36
1572	27	0	3	3	3	3	1	0	3	1	0	0	1	0	3	3	999	999	3	0	24	13	5	6	42	82	44	33	43
1573	36	0	3	3	3	3	1	1	3	1	0	0	3	0	0	3	999	999	3	0	24	12	6	6	25	73	36	27	33
1574	40	1	3	0	0	2	3	1	3	2	3	0	3	2	0	2	999	999	3	0	24	15	6	3	38	66	39	44	39
1575	41	0	0	0	3	3	3	3	3	2	2	2	0	0	0	3	999	999	3	0	24	8	11	5	46	75	37	34	39
1576	46	1	3	1	1	0	3	1	0	3	0	3	3	3	3	0	999	999	3	0	24	12	8	4	37	82	39	43	32
1577	22	0	3	1	2	1	0	3	3	2	3	3	0	0	0	3	999	999	3	0	24	10	7	7	32	82	43	33	40
1578	42	1	3	0	1	3	3	0	0	0	3	3	3	0	3	2	999	999	3	0	24	17	4	3	42	95	53	40	35
1579	29	0	3	0	3	3	3	1	0	3	3	0	3	0	3	0	999	999	3	0	25	15	10	0	44	72	41	34	28
1580	34	0	3	2	2	2	3	3	3	1	1	1	0	1	2	1	999	999	3	0	25	10	9	6	30	87	36	35	34
1581	53	0	3	3	0	1	3	3	3	0	0	0	0	3	3	3	999	999	3	0	25	13	6	6	27	82	31	34	44
1582	23	0	1	2	1	1	1	3	0	3	3	2	2	2	2	2	999	999	3	0	25	13	8	4	35	89	33	36	39
1583	20	1	1	0	3	3	3	1	3	3	0	2	1	2	3	0	999	999	3	0	25	10	10	5	45	78	43	41	33
1584	17	1	3	0	3	0	3	2	3	2	3	0	3	2	1	0	999	999	3	0	25	12	10	3	43	71	41	34	31
1585	34	0	2	3	2	3	1	1	3	3	0	3	0	3	1	0	999	999	3	0	25	9	7	9	40	90	47	41	39
1586	23	0	3	0	3	1	1	3	3	2	1	3	1	1	3	0	999	999	3	0	25	10	9	6	47	73	37	39	29
1587	33	0	0	2	2	0	3	3	2	3	3	2	0	3	0	2	999	999	3	0	25	8	11	6	44	88	39	36	41
1588	38	1	3	0	1	3	3	1	2	3	1	2	1	0	3	2	999	999	3	0	25	13	8	4	44	79	47	41	41
1589	24	0	0	0	3	3	3	0	2	1	0	2	3	3	3	2	999	999	3	0	25	14	7	4	42	85	34	36	31
1590	45	0	3	3	3	1	1	0	3	1	1	1	3	1	1	3	999	999	3	0	25	13	5	7	45	76	38	45	35
1591	16	1	3	2	3	2	1	0	2	2	2	3	3	2	0	1	999	999	3	0	26	13	6	7	53	65	40	30	32
1592	27	1	3	0	3	3	3	0	3	0	2	2	1	2	2	2	999	999	3	0	26	15	6	5	22	82	31	46	41
1593	18	0	3	3	3	3	2	1	3	2	2	0	0	1	0	3	999	999	3	0	26	12	8	6	46	77	39	41	38
1594	36	1	3	0	3	2	3	0	3	3	0	0	0	3	3	3	999	999	3	0	26	14	9	3	32	82	40	39	40
1595	56	0	1	0	3	1	1	1	3	3	0	3	1	3	3	3	999	999	3	0	26	12	8	6	47	73	41	40	29
1596	18	0	1	3	1	2	2	1	2	2	2	2	2	2	2	2	999	999	3	0	26	13	6	7	51	89	39	27	42
1597	33	1	1	3	3	3	3	1	3	3	1	0	1	0	1	3	999	999	3	0	26	10	10	6	43	78	39	32	35
1598	47	0	3	0	2	3	3	0	3	1	0	2	3	0	3	3	999	999	3	0	26	15	6	5	38	66	46	31	37
1599	43	1	3	3	0	3	1	0	3	1	0	3	3	3	3	0	999	999	3	0	26	15	2	9	21	87	36	39	25
1600	43	0	2	3	3	3	3	2	3	1	1	2	0	1	1	1	999	999	3	0	26	9	9	8	43	80	40	50	29
1601	17	0	3	2	0	3	1	2	3	0	3	0	2	2	2	3	999	999	3	0	26	18	3	5	43	92	44	39	37
1602	17	0	1	0	3	0	3	1	2	3	3	3	1	0	3	3	999	999	3	0	26	11	10	5	42	86	35	41	48
1603	31	0	1	3	3	3	3	1	3	2	0	0	0	3	3	2	999	999	3	0	27	12	9	6	43	81	36	35	36
1604	20	0	1	0	3	1	3	3	3	3	3	3	3	0	1	0	999	999	3	0	27	9	12	6	52	68	33	41	28
1605	46	0	3	3	0	3	0	1	3	0	1	3	3	3	1	3	999	999	3	0	27	17	1	9	44	71	44	46	41
1606	37	0	2	3	3	2	2	0	2	0	1	3	3	2	1	3	999	999	3	0	27	14	5	8	45	77	37	40	41
1607	18	1	3	0	3	3	3	3	0	3	1	1	3	0	3	1	999	999	3	0	27	14	12	1	39	74	31	41	30
1608	30	0	1	3	3	0	0	0	2	3	3	3	0	3	3	3	999	999	3	0	27	13	6	8	33	93	45	35	42
1609	21	0	3	3	1	2	3	3	2	1	0	2	3	1	3	0	999	999	3	0	27	12	8	7	31	90	44	41	37
1610	51	0	3	3	3	3	3	1	3	1	1	3	3	0	1	0	999	999	3	0	28	11	8	9	29	78	40	38	42
1611	24	0	1	2	1	3	3	3	3	0	3	3	2	1	1	2	999	999	3	0	28	13	7	8	37	86	41	40	33
1612	17	1	3	3	2	3	3	1	0	2	3	0	0	3	3	3	999	999	3	0	29	18	8	3	38	83	47	47	44
1613	37	0	0	1	0	2	3	3	3	3	3	2	0	3	3	3	999	999	3	0	29	14	9	6	45	89	42	45	43
1614	36	0	1	3	1	3	3	1	3	3	1	3	1	0	3	3	999	999	3	0	29	12	8	9	42	84	40	35	37
1615	27	0	1	3	3	1	3	3	3	2	3	2	0	1	1	3	999	999	3	0	29	10	11	8	46	83	52	45	32
1616	32	0	3	2	3	3	3	1	3	3	3	3	3	0	0	0	999	999	3	0	30	12	10	8	41	70	45	40	40
1617	41	1	0	3	3	0	3	3	3	3	0	0	3	3	3	3	999	999	3	0	30	12	12	6	40	68	40	30	42
1618	19	0	3	0	3	3	3	0	3	3	3	0	3	0	3	3	999	999	3	0	30	18	9	3	51	71	36	29	20
1619	24	0	1	3	3	3	3	3	2	3	3	0	0	0	3	3	999	999	3	0	30	13	12	5	49	73	41	31	29
1620	33	1	3	0	2	3	3	2	3	2	0	0	3	3	3	3	999	999	3	0	30	18	9	3	40	72	38	32	36
1621	50	1	3	3	3	3	3	1	3	3	3	0	3	0	2	0	999	999	3	0	30	14	10	6	46	73	45	36	32
1622	43	0	3	3	1	3	3	1	3	3	3	1	1	1	3	1	999	999	3	0	30	15	8	7	45	93	43	33	27
1623	20	0	2	2	3	2	3	3	3	3	2	2	0	0	2	3	999	999	3	0	30	11	12	7	49	77	47	33	30
1624	29	0	3	3	3	3	1	1	3	1	3	1	3	1	3	1	999	999	3	0	30	17	6	7	38	88	45	49	46
1625	19	2	3	3	2	2	1	1	3	1	3	2	2	2	3	2	999	999	3	0	30	17	5	8	49	86	32	33	29
1626	26	0	0	1	3	3	3	1	2	3	3	2	1	2	3	3	999	999	3	0	30	15	10	5	47	80	36	46	39
1627	31	0	2	3	3	3	3	1	3	1	0	3	3	3	0	2	999	999	3	0	30	13	8	9	46	80	39	37	35
1628	23	0	3	3	3	3	3	3	3	3	3	0	0	3	1	0	999	999	3	0	31	13	12	6	49	79	47	25	33
1629	33	1	3	0	3	3	3	1	3	3	3	3	3	0	3	0	999	999	3	0	31	15	10	6	44	72	32	36	30
1630	23	0	3	3	3	1	3	3	3	1	3	3	3	0	1	1	999	999	3	0	31	12	10	9	39	86	48	41	50
1631	43	0	3	0	2	3	3	3	2	3	3	0	3	0	3	3	999	999	3	0	31	18	11	2	48	85	35	38	35
1632	29	0	0	3	3	3	3	1	3	1	0	3	2	3	3	3	999	999	3	0	31	14	8	9	51	77	40	49	38
1633	24	0	3	3	2	3	2	1	3	3	2	3	3	1	1	2	999	999	3	0	32	15	8	9	47	91	51	40	42
1634	27	0	1	3	2	3	3	2	3	3	3	3	0	0	3	3	999	999	3	0	32	13	10	9	42	70	42	26	41
1635	36	1	3	3	3	3	3	1	3	0	3	0	3	3	1	3	999	999	3	0	32	19	7	6	41	71	32	30	36
1636	21	2	3	3	3	3	3	0	2	1	2	3	3	3	1	2	999	999	3	0	32	17	7	8	49	73	43	44	33
1637	20	0	3	0	2	3	3	0	3	3	3	3	0	3	3	3	999	999	3	0	32	18	8	6	51	79	43	43	37
1638	20	0	1	3	3	3	3	1	1	3	3	3	3	2	3	0	999	999	3	0	32	15	10	7	47	87	43	48	29
1639	43	2	0	1	2	2	2	3	1	3	3	3	3	3	3	3	999	999	3	0	32	17	10	5	44	83	41	36	53
1640	31	0	3	0	3	3	1	1	3	3	3	3	1	3	3	3	999	999	3	0	33	19	8	6	42	67	30	39	34
1641	23	0	3	3	3	3	3	1	3	3	1	0	3	3	1	3	999	999	3	0	33	17	10	6	56	72	32	42	26
1642	26	0	1	3	3	3	3	1	3	1	3	3	3	3	0	3	999	999	3	0	33	16	8	9	44	73	31	37	38
1643	41	0	3	3	3	3	3	1	3	0	3	0	3	3	3	3	999	999	3	0	34	21	7	6	31	72	38	35	36
1644	16	0	1	1	1	3	3	3	3	1	3	3	3	3	3	3	999	999	3	0	34	19	8	7	53	78	38	35	30
1645	37	0	3	2	3	3	3	3	3	3	0	3	3	0	3	3	999	999	3	0	35	15	12	8	53	64	44	39	21
1646	33	0	3	0	3	3	3	1	3	3	3	3	3	3	1	3	999	999	3	0	35	19	10	6	38	75	43	41	39
1647	20	0	3	3	3	2	3	2	3	3	2	2	3	2	3	2	999	999	3	0	36	17	11	8	52	67	39	35	25
1648	22	0	3	3	3	3	3	1	3	1	1	3	3	3	3	3	999	999	3	0	36	19	8	9	40	72	37	46	33
1649	34	0	0	3	2	3	3	1	3	3	3	3	3	3	3	3	999	999	3	0	36	18	9	9	38	80	30	37	31
1650	33	0	3	3	2	3	2	0	3	2	3	3	3	3	3	3	999	999	3	0	36	21	6	9	49	79	42	29	38
1651	33	0	3	3	3	3	3	1	3	3	1	3	1	3	3	3	999	999	3	0	36	17	10	9	51	74	35	42	30
1652	39	0	3	3	3	3	3	1	3	3	3	3	3	2	1	3	999	999	3	0	37	18	10	9	37	77	29	36	44
1653	19	0	3	3	3	3	3	1	2	3	3	3	3	3	1	3	999	999	3	0	37	19	10	8	50	74	49	34	23
1654	34	0	3	3	3	3	3	3	3	1	3	3	3	0	3	3	999	999	3	0	37	18	10	9	50	73	48	33	31
1655	19	2	3	3	3	3	3	1	3	3	3	0	3	3	3	3	999	999	3	0	37	21	10	6	47	79	39	44	46
1656	31	0	3	2	2	3	3	2	3	2	3	2	3	3	3	3	999	999	3	0	37	21	9	7	45	80	46	48	37
1657	32	0	1	3	3	3	3	3	3	3	3	3	1	3	3	3	999	999	3	0	38	17	12	9	43	70	30	33	45
1658	25	0	3	3	3	3	3	3	3	3	1	1	3	3	3	3	999	999	3	0	38	19	12	7	44	72	38	41	43
1659	22	0	3	3	3	3	3	3	3	2	3	3	3	0	3	3	999	999	3	0	38	18	11	9	40	77	33	44	31
1660	23	0	3	3	3	3	3	1	3	1	3	3	3	3	3	3	999	999	3	0	38	21	8	9	44	79	37	29	44
1661	19	2	3	3	3	3	3	0	3	3	3	3	3	3	3	3	999	999	3	0	39	21	9	9	24	75	36	40	24
1662	37	0	3	3	3	3	3	0	3	3	3	3	3	3	3	3	999	999	3	0	39	21	9	9	45	72	31	33	35
1663	22	0	3	0	3	3	3	3	3	3	3	3	3	3	3	3	999	999	3	0	39	21	12	6	56	63	33	28	35
1664	38	2	3	3	3	3	3	3	3	3	3	3	3	0	3	3	999	999	3	0	39	18	12	9	37	87	37	44	45
1665	30	0	3	3	3	3	3	1	3	3	3	3	3	3	3	3	999	999	3	0	40	21	10	9	42	76	30	38	39
1666	28	1	3	3	3	3	3	1	3	3	3	3	3	3	3	3	999	999	3	0	40	21	10	9	42	67	34	31	35
1667	20	0	3	3	3	3	3	1	3	3	3	3	3	3	3	3	999	999	3	0	40	21	10	9	54	70	43	33	32

## Sheet: codes
Missing data	999
Sex
	0	female
	1	male
	2	other/non-binary
Were you diagnosed with autism in a clinically established conditions?
	0	no
	1	yes
Do you have a diagnosis of Autism or Autism Spectrum established with ADOS?
	0	no
	1	yes
