# Supplementary material for: Development and Initial Validation of The Russian Version of The RAADS-14: A Self-Report Questionnaire to Assess Autistic Traits
Source: Research Square preprint supplement (doi:10.21203/rs.3.rs-109635/v1), 2020-11-25
Supplement: Supplementary file 1 [file f47ac5d8ff065715bb2a4901.pdf]

This document is a Supplementary file 1 to a manuscript sent for peer review to the Scientific Reports journal

Manuscript title: **Development and initial validation of the Russian version of the RAADS-14: a self-report questionnaire to assess autistic traits**

Authors: **Ivan Skorokhodov, Ksenia Vergeles, Elena Skorokhodova, Svetlana Firsova, Galina Portnova, Anton Varlamov**

## RAADS-14 Rus

Пожалуйста, оцените, насколько верно каждое из утверждений наиболее точно описывает вас в настоящее время и в детстве (до 16 лет), и поставьте отметку в соответствующей графе. Пожалуйста, ограничьте свой выбор одним ответом для каждого пункта.

| Переживания и индивидуальные особенности, которые могут вас характеризовать                                                    | Верно и сейчас, и в детстве | Верно только сейчас      | Было верно только для возраста до 16 лет | Неверно и никогда не было верно |
|--------------------------------------------------------------------------------------------------------------------------------|-----------------------------|--------------------------|------------------------------------------|---------------------------------|
| 1. Во время разговора с другими людьми мне сложно понять, что они чувствуют                                                    | <input type="checkbox"/>    | <input type="checkbox"/> | <input type="checkbox"/>                 | <input type="checkbox"/>        |
| 2. Мне очень неприятно ощущать прикосновение некоторых обычных материалов к своей коже, хотя других они, похоже, не раздражают | <input type="checkbox"/>    | <input type="checkbox"/> | <input type="checkbox"/>                 | <input type="checkbox"/>        |
| 3. Мне очень сложно действовать и работать в коллективах                                                                       | <input type="checkbox"/>    | <input type="checkbox"/> | <input type="checkbox"/>                 | <input type="checkbox"/>        |
| 4. Мне сложно понять, что от меня ожидают другие люди                                                                          | <input type="checkbox"/>    | <input type="checkbox"/> | <input type="checkbox"/>                 | <input type="checkbox"/>        |
| 5. Я часто не знаю как вести себя при взаимодействии с другими людьми                                                          | <input type="checkbox"/>    | <input type="checkbox"/> | <input type="checkbox"/>                 | <input type="checkbox"/>        |
| 6. Я могу поболтать о пустяках с другими людьми                                                                                | <input type="checkbox"/>    | <input type="checkbox"/> | <input type="checkbox"/>                 | <input type="checkbox"/>        |
| 7. Когда я чувствую, что перегружен ощущениями, мне нужно уединиться, чтобы приглушить их.                                     | <input type="checkbox"/>    | <input type="checkbox"/> | <input type="checkbox"/>                 | <input type="checkbox"/>        |
| 8. Как находить друзей и общаться – загадка для меня                                                                           | <input type="checkbox"/>    | <input type="checkbox"/> | <input type="checkbox"/>                 | <input type="checkbox"/>        |

| Переживания и индивидуальные особенности, которые могут вас характеризовать |                                                                                                                                              | Верно и сейчас, и в детстве | Верно только сейчас      | Было верно только для возраста до 16 лет | Неверно и никогда не было верно |
|-----------------------------------------------------------------------------|----------------------------------------------------------------------------------------------------------------------------------------------|-----------------------------|--------------------------|------------------------------------------|---------------------------------|
| 9.                                                                          | Когда я разговариваю с кем-то, мне трудно понять, когда моя очередь говорить или слушать                                                     | <input type="checkbox"/>    | <input type="checkbox"/> | <input type="checkbox"/>                 | <input type="checkbox"/>        |
| 10.                                                                         | Иногда мне приходится затыкать уши, чтобы приглушить нестерпимый шум (например, звук пылесоса или слишком громкий или многословный разговор) | <input type="checkbox"/>    | <input type="checkbox"/> | <input type="checkbox"/>                 | <input type="checkbox"/>        |
| 11.                                                                         | Мне бывает очень сложно понять выражение лица, позу и значение жестов собеседника.                                                           | <input type="checkbox"/>    | <input type="checkbox"/> | <input type="checkbox"/>                 | <input type="checkbox"/>        |
| 12.                                                                         | Я концентрируюсь на деталях, а не на общей идее                                                                                              | <input type="checkbox"/>    | <input type="checkbox"/> | <input type="checkbox"/>                 | <input type="checkbox"/>        |
| 13.                                                                         | Я воспринимаю сказанное слишком буквально, поэтому часто упускаю, что пытается сказать собеседник                                            | <input type="checkbox"/>    | <input type="checkbox"/> | <input type="checkbox"/>                 | <input type="checkbox"/>        |
| 14.                                                                         | Меня очень расстраивает, когда мне приходится изменять привычный образ действий                                                              | <input type="checkbox"/>    | <input type="checkbox"/> | <input type="checkbox"/>                 | <input type="checkbox"/>        |

## **Подсчет баллов**

Большинство вопросов имеют прямое кодирование.

Верно и сейчас, и в детстве = 3, Верно только сейчас = 2, Было верно только для возраста до 16 лет = 1, Неверно и никогда не было верно = 0

В вопросах, отмеченных буквой R следует использовать обратное кодирование (Верно и сейчас, и в детстве = 3, Верно только сейчас = 2, Было верно только для возраста до 16 лет = 1, Неверно и никогда не было верно = 0).

Для оценки каждой из шкал сложите результаты соответствующих вопросов: Социальная ментализация (СМ) (5 пунктов, минимальное значение 0, максимальное значение 15): 1, 4, 9, 11, 13

Сложности социального взаимодействия (ССВ) (5 пунктов, минимальное значение 0, максимальное значение 15): 3, 5, 6R, 8

Сенсорное восприятие и когнитивный стиль (СВиКС) (4 пункта, минимальное значение 0, максимальное значение 12): 2, 7, 10, 12, 14

Итоговая оценка получается сложением результатов по всем трём шкалам и может использоваться при скрининге расстройств аутистического спектра (минимально возможное значение 0 баллов, максимально возможное значение 42 балла).

## **Интерпретация результатов:**

От 0 до 16 баллов — низкая выраженность аутистических характеристик и очень низкий риск наличия РАС;

От 17 до 21 балла — умеренная выраженность аутистических характеристик, низкий риск наличия РАС;

От 22 до 29 баллов — высокая выраженность аутистических характеристик, значительный риск наличия РАС;

От 30 до 42 баллов — очень высокая выраженность аутистических характеристик, высокий риск наличия РАС.

## RAADS-14

Please choose one of the following alternatives:

This is true or describes me now and when I was young.

This was true or describes me only now (refers to skills acquired).

This was true only when I was young (16 years or younger).

This was never true and never described me.

Please answer the questions according to what is true for you. Check only one column per statement!

| Some life experiences and personality characteristics that may apply to you |                                                                                                                               | True now and when I was young | True only now            | True only when I was younger than 16 | Never true               |
|-----------------------------------------------------------------------------|-------------------------------------------------------------------------------------------------------------------------------|-------------------------------|--------------------------|--------------------------------------|--------------------------|
| 1.                                                                          | It is difficult for me to understand how other people are feeling when we are talking                                         | <input type="checkbox"/>      | <input type="checkbox"/> | <input type="checkbox"/>             | <input type="checkbox"/> |
| 2.                                                                          | Some ordinary textures that do not bother others feel very offensive when they touch my skin                                  | <input type="checkbox"/>      | <input type="checkbox"/> | <input type="checkbox"/>             | <input type="checkbox"/> |
| 3.                                                                          | It is very difficult for me to work and function in groups                                                                    | <input type="checkbox"/>      | <input type="checkbox"/> | <input type="checkbox"/>             | <input type="checkbox"/> |
| 4.                                                                          | It is difficult to figure out what other people expect of me                                                                  | <input type="checkbox"/>      | <input type="checkbox"/> | <input type="checkbox"/>             | <input type="checkbox"/> |
| 5.                                                                          | I often don't know how to act in social situations                                                                            | <input type="checkbox"/>      | <input type="checkbox"/> | <input type="checkbox"/>             | <input type="checkbox"/> |
| 6.                                                                          | I can chat and make small talk with people                                                                                    | <input type="checkbox"/>      | <input type="checkbox"/> | <input type="checkbox"/>             | <input type="checkbox"/> |
| 7.                                                                          | When I feel overwhelmed by my senses, I have to isolate myself to shut them down                                              | <input type="checkbox"/>      | <input type="checkbox"/> | <input type="checkbox"/>             | <input type="checkbox"/> |
| 8.                                                                          | How to make friends and socialize is a mystery to me                                                                          | <input type="checkbox"/>      | <input type="checkbox"/> | <input type="checkbox"/>             | <input type="checkbox"/> |
| 9.                                                                          | When talking to someone, I have a hard time telling when it is my turn to talk or to listen                                   | <input type="checkbox"/>      | <input type="checkbox"/> | <input type="checkbox"/>             | <input type="checkbox"/> |
| 10.                                                                         | Sometimes I have to cover my ears to block out painful noises (like vacuum cleaners or people talking too much or too loudly) | <input type="checkbox"/>      | <input type="checkbox"/> | <input type="checkbox"/>             | <input type="checkbox"/> |

| Some life experiences and personality characteristics that may apply to you |                                                                                          | True now and when I was young | True only now            | True only when I was younger than 16 | Never true               |
|-----------------------------------------------------------------------------|------------------------------------------------------------------------------------------|-------------------------------|--------------------------|--------------------------------------|--------------------------|
| 11.                                                                         | It can be very hard to read someone's face, hand, and body movements when we are talking | <input type="checkbox"/>      | <input type="checkbox"/> | <input type="checkbox"/>             | <input type="checkbox"/> |
| 12.                                                                         | I focus on details rather than the overall idea                                          | <input type="checkbox"/>      | <input type="checkbox"/> | <input type="checkbox"/>             | <input type="checkbox"/> |
| 13.                                                                         | I take things too literally, so I often miss what people are trying to say               | <input type="checkbox"/>      | <input type="checkbox"/> | <input type="checkbox"/>             | <input type="checkbox"/> |
| 14.                                                                         | I get extremely upset when the way I like to do things is suddenly changed               | <input type="checkbox"/>      | <input type="checkbox"/> | <input type="checkbox"/>             | <input type="checkbox"/> |

## RAADS-14 Screen

### Scoring:

- All items (except item 6 which is reversed and therefore marked with\*) range from 3 to 0.
- The score ranges from a minimum of 0 to a maximum of 42.

### RAADS-14 Screen contains three subdomains:

- Mentalizing deficits: items 1, 4, 9, 11, 12, 13, 14 (explaining 32.5% of the variance)
- Social anxiety: items 3,5,6,8 (explaining 8.5% of the variance)
- Sensory reactivity: items 2,7,10 (explaining 6.4% of the variance)

### Median score for different populations:

- **32** in 135 adults with normal intelligence diagnosed with autism spectrum disorder (ASD).
- **15** in 344 adults with normal intelligence diagnosed with attention deficit hyperactivity disorder (ADHD).
- **11** in the collapsed group of 164 adults with other psychiatric disorders, specified as psychotic disorder (n=30), mood disorder (n=59), anxiety disorder or OCD (n=67) and borderline personality disorder (n=39). The sums of reported diagnoses exceed the number of patients in the group because of co-occurring diagnoses.
- **3** in 590 non-psychiatric controls

### A cut-off score of 14 or above reached a sensitivity of 97% and a specificity of:

- 46% for the ADHD group.
- 64% for the other psychiatric disorders group (described above).
- 95% for the non-psychiatric controls.

### The discriminatory power of the first five items in the RAADS-14 Screen:

- A cut-off point of 4 or greater from a maximum of 15 points yielded a sensitivity of 93% and a specificity of 45% in the ADHD sample, 49% in the other psychiatric disorders group, and 90% in the non-psychiatric sample.

RAADS-14-Screen is an abridged version of Ritvo Autism and Asperger Diagnostic Scale-Revised (RAADS-R). Cite: Eriksson JM, Andersen MJ, Bejerot S. RAADS-14 Screen: validity of a screening tool for Autism Spectrum Disorder in an adult psychiatric population. Molecular Autism 2013; 4:49.
